# Supplementary material for: Cyclization of N-Boc-(E)-α,β-unsaturated γ-amino acid active esters into N-Boc-(Z)-α,β-unsaturated γ-lactams through E → Z isomerization
Source: Royal Society of Chemistry journal article supplement (doi:10.1039/d3ob00127j), 2023-01-01
Supplement: d3ob00127j1.pdf [file d3ob00127j1.pdf]

## Supporting Information

### Cyclization of *N*-Boc-(*E*)- $\alpha,\beta$ -Unsaturated $\gamma$ -Amino Acid Active Esters into *N*-Boc-(*Z*)- $\alpha,\beta$ -Unsaturated $\gamma$ -Lactams through *E*→*Z* Isomerization

Manjeet Singh, Manish Kumar, Sachin A. Nalawade, DRGKoppalu R. Puneeth Kumar and Hosahudya N. Gopi\*

Department of Chemistry, Indian Institute of Science Education and Research, Dr. Homi Bhabha Road, Pashan, Pune-411 008, E-mail: [hn.gopi@iiserpune.ac.in](mailto:hn.gopi@iiserpune.ac.in)

#### Table of Contents

|                                                                                           |     |
|-------------------------------------------------------------------------------------------|-----|
| 1. Materials and methods.....                                                             | S2  |
| 2. Synthetic procedures for OPfp/ONp esters of ( <i>E</i> )-vinylogous amino acids.....   | S2  |
| 3. Reaction condition optimization .....                                                  | S10 |
| 4. Transformation of active esters into $\alpha,\beta$ -unsaturated $\gamma$ -lactam..... | S11 |
| 5. Determining the kinetic parameters of lactamization reaction by UV experiments.....    | S19 |
| 6. Determination of extent of activation by $^1\text{H}$ NMR and IR Experiment.....       | S21 |
| 7. ORTEP diagrams and crystallographic information.....                                   | S23 |
| 8. $^1\text{H}$ , $^{13}\text{C}$ and $^{19}\text{F}$ NMR data.....                       | S29 |
| 9. Mass spectra and IR spectra.....                                                       | S74 |
| 10. HPLC traces.....                                                                      | S85 |
| 11. References.....                                                                       | S85 |

## 1. Materials and methods

All the cyclization reactions were performed under N<sub>2</sub> conditions. All the amino acids, Boc anhydride, Benzyl chloroformate, N-hydroxysuccinimide, NaBH<sub>4</sub>, Oxone, HBTU, HOBT, Ethyl bromoacetate, Triphenyl Phosphine (PPh<sub>3</sub>), Trifluoroacetic acid (TFA), N,N-Diisopropylethylamine (DIPEA), DMF, EtOAc, Hexane, were purchased from different commercial sources. Ethyl acetate, Hexane, and THF (over sodium) were distilled before use. Column chromatography was performed on silica gel (60-120). Reactions were monitored by analytical thin layer chromatography (TLC) and confirmed by UV light chamber and KMnO<sub>4</sub> or ninhydrin staining. <sup>1</sup>H NMR, <sup>13</sup>C NMR, and <sup>19</sup>F NMR spectra were recorded in deuterated solvents on 400 MHz, 101 MHz, and 377 MHz NMR machines respectively using the residual solvent signal as the internal standard (CDCl<sub>3</sub>). Chemical shifts are reported in parts per million (ppm, δ) relative to tetramethyl silane (δ 0.00). <sup>1</sup>H NMR splitting patterns are assigned as singlet (s), doublet (d), broad singlet (bs), triplet (t), doublet of doublets (dd), and quintet (qn). Coupling constants (*J*) are reported in Hertz (Hz). Mass spectra were recorded using HRMS Electron Spray Ionization (ESI). IR spectra were recorded on an IR spectrometer. HPLC was done using a Chiralpak<sup>®</sup>-IC column (4.6 mmφ x 250 mmL) of particle size 5 μm. The X-ray data were collected at low temperatures (100, 120 K and 150 K) on a Bruker APEX (II) DUO CCD diffractometer using Mo K<sub>α</sub> (λ = 0.71073 Å) and Cu K<sub>α</sub> radiation (λ = 1.54178 Å) graphite monochromated radiation.

## 2. Synthetic procedures for OPfp/ONp esters of (*E*)-vinyllogous amino acids.

The *N*-protected α,β-unsaturated γ-amino esters (Boc/CbzHN-(*S,E*)d<sup>2,3</sup>γXxx-OEt) were prepared by the previously reported procedures.<sup>1</sup> Boc/Cbz and ethyl ester protecting groups were used to protect the *N*- terminus and *C*- terminus of the (*E*)-vinyllogous amino acids, respectively and the ethyl ester was deprotected by base hydrolysis using 1*N* NaOH, to obtain **1a-1g**.<sup>1</sup> The synthetic details of OPfp esters synthesis is given below. The purification of final OPfp esters was carried out through silica gel column chromatography using ethyl acetate and hexane solvent gradient as eluent.

**A) General procedure for the synthesis of OPfp esters of (*E*)-vinyllogous amino acids (**2a-2g**).**

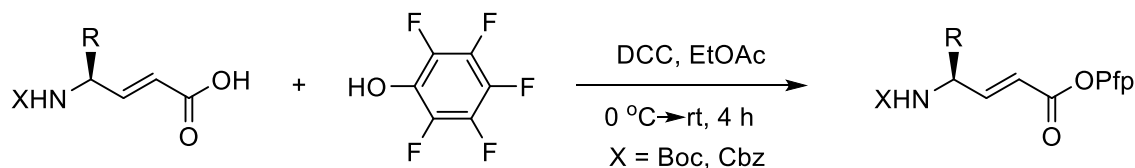

**Scheme S1:** Synthesis of active esters Boc/CbzHN-(*S,E*)-d<sup>2,3</sup>γXxx-OPfp (**2a-2g**).

Boc/CbzHN-d<sup>2,3</sup>γXxx-OH (2 mmol) was dissolved in 50 mL of EtOAc, to this solution DCC (459 mg, 2.2 mmol) was added under ice-cold conditions, after stirring the reaction mixture for about 5 min, pentafluorophenol (368 mg, 2 mmol) was added.<sup>2</sup> The reaction mixture was allowed to be stirred for 4 h at room temperature. After completion of the reaction (progress of the reaction monitored by TLC), filtration was done by using a sintered funnel for removing urea (DCU) from the reaction mixture in form of residue. The filtrate part containing the product was concentrated under reduced pressure. The obtained crude product was purified through a silica gel (60-120 mesh) column by ethyl acetate and hexane mixture as eluent.

**Boc-(*S,E*)-d<sup>2,3</sup>γPhe-OPfp (**2a**)** A mixture of Boc-(*S,E*)-d<sup>2,3</sup>γPhe-OH (**1a**, 582 mg, 2 mmol), DCC (454 mg, 2.2 mmol), EtOAc (50 mL) in 100 ml round bottom flask with a magnetic stirring bar was stirred vigorously for 5 min. at 0 °C under N<sub>2</sub> atmosphere. Then, pentafluorophenol (368 mg, 2 mmol) was added to the above reaction mixture. The progress of the reaction is monitored by TLC, after the completion of the reaction, filtration was done by using a sintered funnel for removing urea (DCU) from the reaction mixture in form of residue. The filtrate part containing the product was concentrated under reduced pressure. The reaction mixture was purified by column chromatography (1–10% EtOAc in hexane) to provide an active ester as a white solid in 94% yield.

R<sub>f</sub> = 0.85 (20% EtOAc in hexane). M.p. 102-104 °C. [α]<sub>D</sub><sup>25</sup> = +6 (c 0.1, MeOH). <sup>1</sup>H NMR (400 MHz, Chloroform-*d*) δ 7.36 – 7.31 (m, 2H), 7.31 – 7.26 (m, 1H), 7.26 – 7.21 (m, 1H), 7.19 (dd, *J* = 8.3, 1.5 Hz, 2H), 6.10 (dd, *J* = 15.7, 1.7 Hz, 1H), 4.73 (s, 1H), 4.61 (s, 1H), 2.96 (d, *J* = 6.9 Hz, 2H), 1.42 (s, 9H). <sup>13</sup>C NMR (101 MHz, Chloroform-*d*) δ 161.82, 155.09, 153.40, 142.56, 140.87, 140.11, 139.28, 138.34, 136.74, 135.98, 129.48, 128.89, 127.30, 117.83, 80.44, 52.74, 40.70, 28.40. <sup>19</sup>F NMR

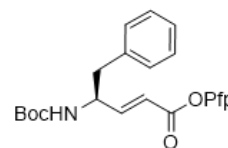

(377 MHz, Chloroform-*d*)  $\delta$  -152.50, -158.07, -162.40. HRMS (ESI) calculated for  $C_{22}H_{20}F_5NO_4Na$   $[M+Na]^+$   $m/z$  480.1209 found 480.1206. IR: 1765  $cm^{-1}$ .

**Boc-(*S,E*)- $d^{2,3}$ Leu-OPfp (2b)** A mixture of Boc-(*S,E*)- $d^{2,3}$ Leu-OH (**1b**, 514 mg, 2 mmol), DCC (454 mg, 2.2 mmol), EtOAc (50 mL) in 100 ml round bottom flask with a magnetic stirring bar was stirred vigorously for 5 min. at 0 °C under  $N_2$  atmosphere. Then, pentafluorophenol (368 mg, 2 mmol) was added to the above reaction mixture. The progress of the reaction is monitored by TLC, after the completion of the reaction, filtration was done by using a sintered funnel for removing urea (DCU) from the reaction mixture in form of residue. The filtrate part containing the product was concentrated under reduced pressure. The reaction mixture was purified by column chromatography (1–10% EtOAc in hexane) to provide an active ester as a white solid in 90% yield.

$R_f$  = 0.85 (20% EtOAc in hexane). M.p. 97-99 °C.  $[\alpha]_D^{25}$  = -22 ( $c$  0.1, MeOH).  $^1H$  NMR (400 MHz, Chloroform-*d*)  $\delta$  7.16 (dd,  $J$  = 15.6, 5.1 Hz, 1H), 6.16 (dd,  $J$  = 15.6, 1.6 Hz, 1H), 4.53 (d,  $J$  = 8.4 Hz, 1H), 4.46 (s, 1H), 1.77 – 1.72 (m, 1H), 1.46 (s, 9H), 1.44 (d,  $J$  = 7.1 Hz, 2H), 0.97 (dd,  $J$  = 6.6, 0.9 Hz, 6H).  $^{13}C$  NMR (101 MHz, Chloroform-*d*)  $\delta$  162.06, 155.24, 154.80, 142.60, 140.86, 140.06, 139.29, 138.34, 136.75, 117.07, 80.24, 50.28, 43.61, 28.47, 24.94, 22.95, 22.12.  $^{19}F$  NMR (377 MHz, Chloroform-*d*)  $\delta$  -152.40, -158.20, -162.42. HRMS (ESI) calculated for  $C_{19}H_{22}F_5NO_4Na$   $[M+Na]^+$   $m/z$  446.1366 found 446.1361. IR: 1765  $cm^{-1}$ .

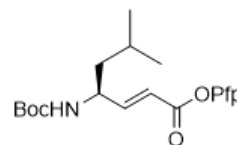

**Boc-(*S,E*)- $d^{2,3}$ Val-OPfp (2c)** A mixture of Boc-(*S,E*)- $d^{2,3}$ Val-OH (**1c**, 482 mg, 2 mmol), DCC (454 mg, 2.2 mmol), EtOAc (50 mL) in 100 ml round bottom flask with a magnetic stirring bar was stirred vigorously for 5 min. at 0 °C under  $N_2$  atmosphere. Then, pentafluorophenol (368 mg, 2 mmol) was added to the above reaction mixture. The progress of the reaction is monitored by TLC, after the completion of the reaction, filtration was done by using a sintered funnel for removing urea (DCU) from the reaction mixture in form of residue. The filtrate part containing the product was concentrated under reduced pressure. The reaction mixture was purified by column chromatography (1–10% EtOAc in hexane) to provide an active ester as a white solid in 91% yield.

$R_f = 0.86$  (20% EtOAc in hexane). M.p. 129-131 °C.  $[\alpha]_D^{25} = -25$  ( $c$  0.1, MeOH).  $^1\text{H NMR}$  (400 MHz, Chloroform- $d$ )  $\delta$  7.19 (dd,  $J = 15.6, 5.1$  Hz, 1H), 6.17 (dd,  $J = 15.6, 1.8$  Hz, 1H), 4.64 (d,  $J = 9.2$  Hz, 1H), 4.30 (s, 1H), 1.99 – 1.89 (m, 1H), 1.47 (s, 9H), 0.98 (dd,  $J = 12.5, 6.8$  Hz, 6H).  $^{13}\text{C NMR}$  (101 MHz, Chloroform- $d$ )  $\delta$  161.92, 155.48, 153.38, 142.71, 141.09, 140.11, 139.33, 138.36, 136.77, 118.23, 80.27, 57.15, 32.37, 28.49, 19.14, 18.19.  $^{19}\text{F NMR}$  (377 MHz, Chloroform- $d$ )  $\delta$  -152.46, -158.15, -162.44. HRMS (ESI) calculated for  $\text{C}_{18}\text{H}_{20}\text{F}_5\text{NO}_4\text{Na}$   $[\text{M}+\text{Na}]^+$   $m/z$  432.1209 found 432.1215. IR: 1759  $\text{cm}^{-1}$ .

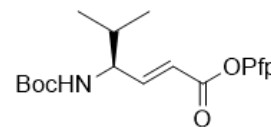

**Boc-(*S,E*)- $d^{2,3}$  $\gamma$ Ala-OPfp (2d)** A mixture of Boc-(*S,E*)- $d^{2,3}$  $\gamma$ Ala-OH (**1d**, 430 mg, 2 mmol), DCC (454 mg, 2.2 mmol), EtOAc (50 mL) in 100 ml round bottom flask with a magnetic stirring bar was stirred vigorously for 5 min. at 0 °C under  $\text{N}_2$  atmosphere. Then, pentafluorophenol (368, 2 mmol) was added to the above reaction mixture. The progress of the reaction is monitored by TLC, after the completion of the reaction, filtration was done by using a sintered funnel for removing urea (DCU) from the reaction mixture in form of residue. The filtrate part containing the product was concentrated under reduced pressure. The reaction mixture was purified by column chromatography (1–10% hexane in EtOAc) to provide an active ester as a white solid in 92% yield.

$R_f = 0.80$  (20% EtOAc in hexane). M.p. 91-93 °C.  $[\alpha]_D^{25} = -29$  ( $c$  0.1, MeOH).  $^1\text{H NMR}$  (400 MHz, Chloroform- $d$ )  $\delta$  7.19 (dd,  $J = 15.7, 4.8$  Hz, 1H), 6.14 (dd,  $J = 15.7, 1.7$  Hz, 1H), 4.63 (s, 1H), 4.51 (s, 1H), 1.46 (s, 9H), 1.34 (d,  $J = 7.0$  Hz, 3H).  $^{13}\text{C NMR}$  (101 MHz, Chloroform- $d$ )  $\delta$  162.04, 155.11, 155.04, 142.59, 140.86, 140.17, 139.28, 138.35, 136.75, 116.91, 80.30, 28.45, 20.12.  $^{19}\text{F NMR}$  (377 MHz, Chloroform- $d$ )  $\delta$  -152.50, -158.16, -162.46. HRMS (ESI) calculated for  $\text{C}_{16}\text{H}_{16}\text{F}_5\text{NO}_4\text{Na}$   $[\text{M}+\text{Na}]^+$   $m/z$  404.0896 found 404.0889. IR: 1764  $\text{cm}^{-1}$ .

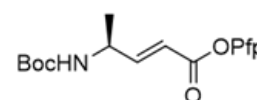

**Boc-(*S,E*)- $d^{2,3}$  $\gamma$ Ile-OPfp (2e)** A mixture of Boc-(*S,E*)- $d^{2,3}$  $\gamma$ Ile-OH (**1e**, 514 mg, 2 mmol), DCC (454 mg, 2.2 mmol), EtOAc (50 mL) in 100 ml round bottom flask with a magnetic stirring bar was stirred vigorously for 5 min. at 0 °C under  $\text{N}_2$  atmosphere. Then, pentafluorophenol (368 mg, 2 mmol) was added to the above reaction mixture. The progress of the reaction is monitored by TLC, after the completion of the reaction, filtration was done by using a sintered funnel for

removing urea (DCU) from the reaction mixture in form of residue. The filtrate part containing the product was concentrated under reduced pressure. The reaction mixture was purified by column chromatography (1–10% EtOAc in hexane) to provide an active ester as a white solid in 90% yield.

$R_f = 0.85$  (20% EtOAc in hexane). M.p. 100-102 °C.  $[\alpha]_D^{25} = -18.5$  ( $c$  0.1, MeOH).  $^1\text{H NMR}$  (400 MHz, Chloroform- $d$ )  $\delta$  7.18 (dd,  $J = 15.7, 5.2$  Hz, 1H), 6.17 (dd,  $J = 15.7, 1.8$  Hz, 1H), 4.66 (d,  $J = 9.1$  Hz, 1H), 4.39 (s, 1H), 1.73 – 1.66 (m, 1H), 1.54 – 1.48 (m, 1H), 1.47 (s, 9H), 1.19 (ddd,  $J = 11.8, 8.3, 6.2$  Hz, 1H), 0.98 – 0.93 (m, 6H).  $^{13}\text{C NMR}$  (101 MHz, Chloroform- $d$ )  $\delta$  161.90, 155.41, 153.20, 140.09, 118.29, 80.24, 56.24, 39.14, 28.48, 25.49, 15.59, 11.75.  $^{19}\text{F NMR}$  (377 MHz, Chloroform- $d$ )  $\delta$  -152.44, -158.17, -162.46. HRMS (ESI) calculated for  $\text{C}_{19}\text{H}_{22}\text{F}_5\text{NO}_4\text{Na}$   $[\text{M}+\text{Na}]^+$   $m/z$  446.1366 found 446.1375. IR: 1764  $\text{cm}^{-1}$ .

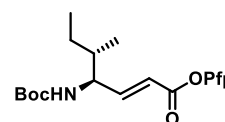

**Boc-(*S,E*)- $d^{2,3}$  $\gamma$ Phg-OPfp (2f)** A mixture of Boc-(*S,E*)- $d^{2,3}$  $\gamma$ Phg-OH (**1f**, 554 mg, 2 mmol), DCC (454 mg, 2.2 mmol), EtOAc (50 mL) in 100 ml round bottom flask with a magnetic stirring bar was stirred vigorously for 5 min. at 0 °C under  $\text{N}_2$  atmosphere. Then, pentafluorophenol (368 mg, 2 mmol) was added to the above reaction mixture. The progress of the reaction is monitored by TLC, after the completion of the reaction, filtration was done by using a sintered funnel for removing urea (DCU) from the reaction mixture in form of residue. The filtrate part containing the product was concentrated under reduced pressure. The reaction mixture was purified by column chromatography (1–10% EtOAc in hexane) to provide an active ester as a white solid in 88% yield.

$R_f = 0.88$  (20% EtOAc in hexane). M.p. 136-138 °C.  $[\alpha]_D^{25} = +9$  ( $c$  0.1, MeOH).  $^1\text{H NMR}$  (400 MHz, Chloroform- $d$ )  $\delta$  7.44 – 7.33 (m, 4H), 7.32 – 7.28 (m, 2H), 6.24 (dd,  $J = 15.6, 1.9$  Hz, 1H), 5.54 (s, 1H), 4.95 (s, 1H), 1.47 (s, 9H).  $^{13}\text{C NMR}$  (101 MHz, Chloroform- $d$ )  $\delta$  161.87, 154.91, 152.76, 140.07, 139.32, 138.42, 136.73, 129.44, 128.75, 127.46, 125.13, 118.15, 80.76, 55.99, 28.47.  $^{19}\text{F NMR}$  (377 MHz, Chloroform- $d$ )  $\delta$  -152.34, -157.99, -162.34. HRMS (ESI) calculated for  $\text{C}_{21}\text{H}_{18}\text{F}_5\text{NO}_4\text{Na}$   $[\text{M}+\text{Na}]^+$   $m/z$  466.1053 found 466.1053. IR: 1764  $\text{cm}^{-1}$ .

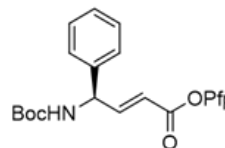

**Cbz-(*S,E*)-d<sup>2,3</sup>γLeu-OPfp (2g)** A mixture of Cbz-(*S,E*)-d<sup>2,3</sup>γLeu-OH (**1g**, 582 mg, 2 mmol), DCC (454 mg, 2.2 mmol), EtOAc (50 mL) in 100 ml round bottom flask with a magnetic stirring bar was stirred vigorously for 5 min. at 0 °C under N<sub>2</sub> atmosphere. Then, pentafluorophenol (368 mg, 2 mmol) was added to the above reaction mixture. The progress of the reaction is monitored by TLC, after the completion of the reaction, filtration was done by using a sintered funnel for removing urea (DCU) from the reaction mixture in form of residue. The filtrate part containing the product was concentrated under reduced pressure. The reaction mixture was purified by column chromatography (1–15% EtOAc in hexane) to provide an active ester as a white solid in 91% yield.

R<sub>f</sub> = 0.82 (20% EtOAc in hexane). [α]<sub>D</sub><sup>25</sup> = -42 (*c* 0.1, MeOH). <sup>1</sup>H NMR (400 MHz, Chloroform-*d*) δ 7.39 – 7.31 (m, 5H), 7.16 (dd, *J* = 15.6, 5.3 Hz, 1H), 6.17 (d, *J* = 15.6 Hz, 1H), 5.14 (s, 2H), 4.83 (d, *J* = 8.4 Hz, 1H), 4.53 (p, *J* = 7.2 Hz, 1H), 1.74 (m, 1H), 1.48 (t, *J* = 7.3 Hz, 2H), 0.97 (d, *J* = 6.6 Hz, 6H). <sup>13</sup>C NMR (101 MHz, Chloroform-*d*) δ 161.95, 155.84, 154.04, 142.69, 140.87, 140.06, 139.28, 138.36, 136.75, 136.20, 128.74, 128.48, 128.32, 117.38, 67.35, 50.80, 43.46, 24.89, 22.91, 22.08. <sup>19</sup>F NMR (377 MHz, Chloroform-*d*) δ -152.39, -158.08, -162.40. HRMS (ESI) calculated for C<sub>22</sub>H<sub>20</sub>F<sub>5</sub>NO<sub>4</sub>Na [M+Na]<sup>+</sup> *m/z* 480.1210 found 480.1209. IR: 1765 cm<sup>-1</sup>.

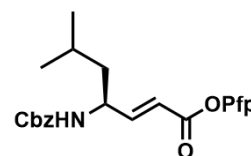

**B) General procedure for the synthesis of ONp esters of (*E*)-vinyllogous amino acids (4a-4c).**

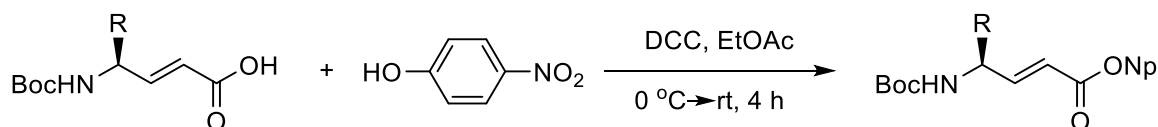

**Scheme S2:** Synthesis of active esters (**4a-4c**).

BocHN-d<sup>2,3</sup>γXxx-OH (2 mmol) was dissolved in 50 mL of EtOAc, to this solution DCC (454 mg, 2.2 mmol) was added under ice-cold conditions, after stirring the reaction mixture for about 5 min, *p*-nitrophenol (278 mg, 2 mmol) was added.<sup>3</sup> The reaction mixture was allowed to be stirred for 4 h at room temperature. After completion of the reaction (progress of the reaction monitored by TLC), filtration was done by using a sintered funnel for removing urea (DCU) from the reaction mixture in form of residue. The filtrate part containing the product was concentrated

under reduced pressure. The obtained crude product was purified through a silica gel (60-120 mesh) column by ethyl acetate and petroleum ethers mixture as eluent.

**Boc-(*S,E*)-d<sup>2,3</sup>γPhe-ONp (4a)** A mixture of Boc-(*S,E*)-d<sup>2,3</sup>γPhe-OH (**1a**, 582 mg, 2 mmol), DCC (454 mg, 2.2 mmol), EtOAc (50 mL) in 100 ml round bottom flask with a magnetic stirring bar was stirred vigorously for 5 min. at 0 °C under N<sub>2</sub> atmosphere. Then, *p*-nitrophenol (278 mg, 2 mmol) was added to the above reaction mixture. The progress of the reaction is monitored by TLC, after the completion of the reaction, filtration was done by using a sintered funnel for removing urea (DCU) from the reaction mixture in form of residue. The filtrate part containing the product was concentrated under reduced pressure. The reaction mixture was purified by column chromatography (1–15% EtOAc in hexane) to provide an active ester as a white solid in 93% yield.

R<sub>f</sub> = 0.86 (20% EtOAc in hexane). M.p. 143-146 °C. [α]<sub>D</sub><sup>25</sup> = -2 (c 0.1, MeOH). <sup>1</sup>H NMR (400 MHz, Chloroform-*d*) δ 8.30 – 8.25 (m, 2H), 7.36 – 7.27 (m, 5H), 7.22 – 7.14 (m, 3H), 6.07 (dd, *J* = 15.6, 1.7 Hz, 1H), 4.70 (bs, 1H), 4.61 (s, 1H), 2.96 (d, *J* = 6.8 Hz, 2H), 1.42 (s, 9H). <sup>13</sup>C NMR (101 MHz, Chloroform-*d*) δ 163.59, 155.51, 155.11, 151.78, 145.45, 136.13, 129.47, 128.89, 127.27, 125.34, 122.56, 119.66, 80.35, 52.75, 40.75, 28.44. HRMS (ESI) calculated for C<sub>22</sub>H<sub>24</sub>N<sub>2</sub>O<sub>6</sub>Na [M+Na]<sup>+</sup> *m/z* 435.1531 found 435.1522. IR: 1743 cm<sup>-1</sup>.

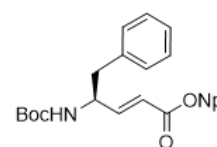

**Boc-(*S,E*)-d<sup>2,3</sup>γLeu-ONp (4b)** A mixture of Boc-(*S,E*)-d<sup>2,3</sup>γLeu-OH (**1b**, 514 mg, 2 mmol), DCC (454 mg, 2.2 mmol), EtOAc (50 mL) in 100 ml round bottom flask with a magnetic stirring bar was stirred vigorously for 5 min. at 0 °C under N<sub>2</sub> atmosphere. Then, *p*-nitrophenol (278 mg, 2 mmol) was added to the above reaction mixture. The progress of the reaction is monitored by TLC, after the completion of the reaction, filtration was done by using a sintered funnel for removing urea (DCU) from the reaction mixture in form of residue. The filtrate part containing the product was concentrated under reduced pressure. The reaction mixture was purified by column chromatography (1–15% EtOAc in hexane) to provide an active ester as a white solid in 91% yield.

R<sub>f</sub> = 0.81 (20% EtOAc in hexane). M.p. 67-69 °C. [α]<sub>D</sub><sup>25</sup> = -40 (c 0.1, MeOH). <sup>1</sup>H NMR (400 MHz, Chloroform-*d*) δ 8.28 (d, *J* = 9.2 Hz, 2H), 7.31 (d, *J* = 9.1 Hz, 2H), 7.09 (dd, *J* = 15.6, 5.4 Hz, 1H), 6.13 (dd, *J* = 15.6, 1.5 Hz, 1H), 4.55 (d, *J* = 8.2 Hz, 1H), 4.44 (t, *J* = 6.5, 1H), 1.73 (dq, *J* = 13.5, 6.8 Hz, 1H), 1.47 (s,

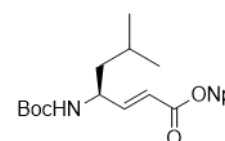



9H), 1.45 – 1.42 (m, 2H), 0.97 (dd,  $J = 6.6, 1.3$  Hz, 6H).  $^{13}\text{C}$  NMR (101 MHz, Chloroform- $d$ )  $\delta$  163.83, 155.34, 153.04, 145.45, 126.32, 125.35, 122.59, 118.96, 115.77, 80.31, 50.30, 43.67, 28.51, 24.94, 22.89, 22.22. HRMS (ESI) calculated for  $\text{C}_{19}\text{H}_{26}\text{N}_2\text{O}_6\text{Na}$   $[\text{M}+\text{Na}]^+$   $m/z$  401.1688 found 401.1682. IR: 1740  $\text{cm}^{-1}$ .

**Boc-(*S,E*)- $\text{d}^{2,3}\gamma\text{Val-ONp}$  (4c)** A mixture of Boc-(*S,E*)- $\text{d}^{2,3}\gamma\text{Val-OH}$  (**1c**, 482 mg, 2 mmol), DCC (454 mg, 2.2 mmol), EtOAc (50 mL) in 100 ml round bottom flask with a magnetic stirring bar was stirred vigorously for 5 min. at 0 °C under  $\text{N}_2$  atmosphere. Then, *p*-nitrophenol (278 mg, 2 mmol) was added to the above reaction mixture. The progress of the reaction is monitored by TLC, after the completion of the reaction, filtration was done by using a sintered funnel for removing urea (DCU) from the reaction mixture in form of residue. The filtrate part containing the product was concentrated under reduced pressure. The reaction mixture was purified by column chromatography (1–15% EtOAc in hexane) to provide an active ester as a white solid in 90% yield.

$R_f = 0.80$  (20% EtOAc in hexane). M.p. 102-104 °C.  $[\alpha]_D^{25} = -44$  ( $c$  0.1, MeOH).  $^1\text{H}$  NMR (400 MHz, Chloroform- $d$ )  $\delta$  8.28 (d,  $J = 9.2$  Hz, 2H), 7.32 (d,  $J = 9.2$  Hz, 2H), 7.12 (dd,  $J = 15.6, 5.4$  Hz, 1H), 6.14 (dd,  $J = 15.7, 1.7$  Hz, 1H), 4.65 (d,  $J = 9.0$  Hz, 1H), 4.27 (s, 1H), 1.93 (dt,  $J = 12.8, 6.3$  Hz, 1H), 1.47 (s, 9H), 0.98 (dd,  $J = 11.2, 6.8$  Hz, 6H).  $^{13}\text{C}$  NMR (101 MHz, Chloroform- $d$ )  $\delta$  163.68, 155.53, 151.64, 145.45, 126.36, 125.34, 122.59, 120.06, 115.92, 80.21, 57.16, 32.32, 28.50, 19.11, 18.23. HRMS (ESI) calculated for  $\text{C}_{18}\text{H}_{24}\text{N}_2\text{O}_6\text{Na}$   $[\text{M}+\text{Na}]^+$   $m/z$  387.1531 found 387.1531. IR: 1740  $\text{cm}^{-1}$ .

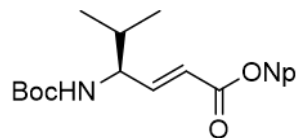

### 3. Reaction condition optimization

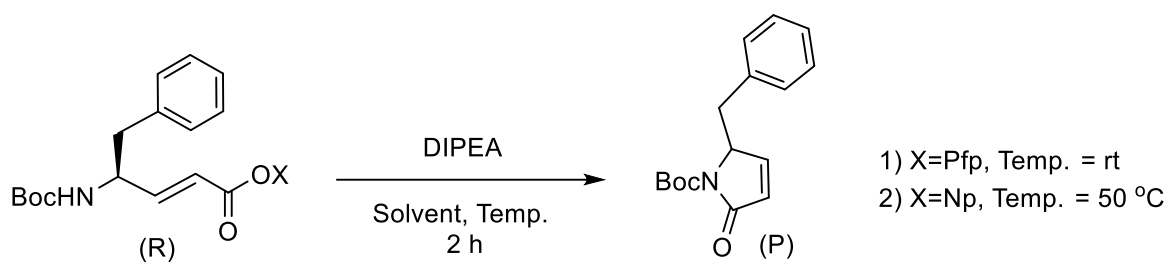

**Scheme S3:** Transformation of OPfp/ONp ester of  $\alpha,\beta$ -unsaturated amino acid into  $\alpha,\beta$ -unsaturated  $\gamma$ -lactam under various reaction conditions.

**Table S1:** List of solvents and reaction conditions used for lactamization.

| Entry | Solvent | Base (eq.) | Yield <sup>a</sup> (%) |
|-------|---------|------------|------------------------|
| 1     | DMF     | DiPEA (1)  | 35                     |
| 2     | Dry DMF | DiPEA (5)  | 88                     |
| 3     | EtOAc   | DiPEA (5)  | 27                     |
| 4     | THF     | DiPEA (5)  | 56                     |
| 5     | DCM     | DiPEA (5)  | 42                     |

<sup>a</sup>Isolated yield.

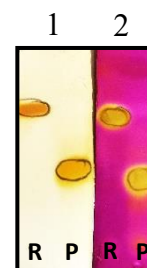

TLC in 20% EtOAc in Pet Ether.

1. Ninhydrin 2. KMnO<sub>4</sub> staining.

**Fig. S1.** TLC analysis of lactamization reaction.

## 4. Transformation of active esters into $\alpha,\beta$ -unsaturated $\gamma$ -lactam.

### A) Synthesis of $\alpha,\beta$ -unsaturated $\gamma$ -lactam from OPfp esters.

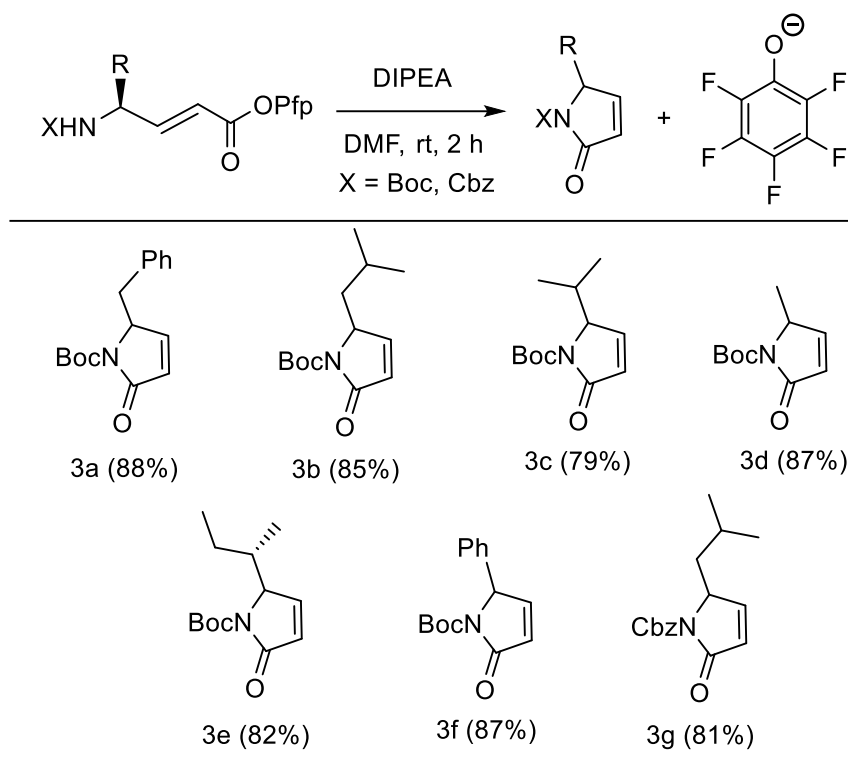

**Scheme S4:** Synthesis of  $N$ -protected-( $Z$ )- $\alpha,\beta$ -unsaturated  $\gamma$ -lactam from OPfp esters of ( $E$ )-vinylglycine derivatives.

Boc- $d^{2,3}\gamma$ Xxx-OPfp (1 mmol) was dissolved in 10 mL of DMF, to this solution DIPEA (0.87 mL, 5 mmol) was added. The reaction mixture was stirred for 2 h at room temperature. After completion of the reaction (monitored by TLC), workup was done by diluting the reaction mixture with ethyl acetate ( $2 \times 50$  mL), followed by successive washings with 10% HCl ( $3 \times 40$  mL), 10%  $\text{Na}_2\text{CO}_3$  ( $3 \times 40$  mL) and brine solution ( $3 \times 25$  mL). The organic layer was dried over anhydrous  $\text{Na}_2\text{SO}_4$  and concentrated under reduced pressure. The obtained crude product was purified through a silica gel (60-120 mesh) column by ethyl acetate and petroleum ethers mixture as eluent.

***tert*-butyl-2-benzyl-5-oxo-2,5-dihydro-1*H*-pyrrole-1-carboxylate (3a)** Boc- $d^{2,3}\gamma$ Phe-OPfp (457 mg, 1 mmol) was dissolved in 10 mL of dry DMF, in a 25 mL of a round bottom flask with a magnetic stirring bar. Then DIPEA (0.87 mL, 5 mmol) was added to the above solution, the

resulting mixture was stirred vigorously at room temperature under an N<sub>2</sub> atmosphere for 2 h. The progress of the reaction is monitored by TLC, after completion of the reaction workup was done by diluting the reaction mixture with ethyl acetate (100 mL), followed by successive washings with 10% HCl (3 × 40 mL), 10% Na<sub>2</sub>CO<sub>3</sub> (3 × 40 mL) and brine solution (2 × 30 mL). The organic layer was dried over anhydrous Na<sub>2</sub>SO<sub>4</sub> and concentrated under reduced pressure. The reaction mixture was purified by column chromatography (5–25% EtOAc in hexane) to provide a **3a** as a white solid in 88% yield.

R<sub>f</sub> = 0.55 (20% EtOAc in hexane). M.p. 99–102 °C. [α]<sub>D</sub><sup>25</sup> = +6 (c 0.1, MeOH). <sup>1</sup>H NMR (400 MHz, Chloroform-*d*) δ 7.34 – 7.27 (m, 3H), 7.17 – 7.13 (m, 2H), 7.02 (dd, *J* = 6.1, 2.0 Hz, 1H), 6.02 (dd, *J* = 6.1, 1.6 Hz, 1H), 4.75 (ddt, *J* = 9.5, 3.8, 1.8 Hz, 1H), 3.55 (dd, *J* = 13.1, 3.9 Hz, 1H), 2.74 (dd, *J* = 13.1, 9.5 Hz, 1H), 1.63 (s, 9H). <sup>13</sup>C NMR (101 MHz, Chloroform-*d*) δ 169.20, 150.05, 149.64, 135.76, 129.51, 128.84, 127.30, 126.79, 83.34, 63.51, 38.74, 28.37. HRMS (ESI) calculated for C<sub>16</sub>H<sub>19</sub>NO<sub>3</sub>Na [M+Na]<sup>+</sup> *m/z* 296.1262, found 296.1262.

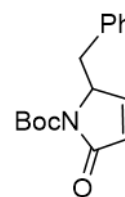

**tert-butyl-2-isobutyl-5-oxo-2,5-dihydro-1H-pyrrole-1-carboxylate (3b)** Boc-d<sup>2,3</sup>γLeu-OPfp (423 mg, 1 mmol) was dissolved in 10 mL of dry DMF, in a 25 ml of round bottom flask with a magnetic stirring bar. Then DIPEA (0.87 mL, 5 mmol) was added to the above solution, the resulting mixture was stirred vigorously at room temperature under an N<sub>2</sub> atmosphere for 2 h. The progress of the reaction is monitored by TLC, after completion of the reaction workup was done by diluting the reaction mixture with ethyl acetate (100 mL), followed by successive washings with 10% HCl (3 × 40 mL), 10% Na<sub>2</sub>CO<sub>3</sub> (3 × 40 mL) and brine solution (2 × 30 mL). The organic layer was dried over anhydrous Na<sub>2</sub>SO<sub>4</sub> and concentrated under reduced pressure. The reaction mixture was purified by column chromatography (5–25% EtOAc in hexane) to provide a **3b** as an oily liquid with an 85% yield.

R<sub>f</sub> = 0.60 (20% EtOAc in hexane). [α]<sub>D</sub><sup>25</sup> = +2 (c 0.1, MeOH). <sup>1</sup>H NMR (400 MHz, Chloroform-*d*) δ 7.22 (dd, *J* = 6.1, 2.0 Hz, 1H), 6.08 (dd, *J* = 6.1, 1.6 Hz, 1H), 4.60 (ddt, *J* = 9.9, 3.7, 1.8 Hz, 1H), 1.67 (td, *J* = 4.5, 2.3 Hz, 1H), 1.56 (s, 9H), 1.47 – 1.41 (m, 2H), 0.99 (d, *J* = 6.6 Hz, 3H), 0.94 (d, *J* = 6.6 Hz, 3H). <sup>13</sup>C NMR (101 MHz, Chloroform-*d*) δ 169.43, 150.69, 149.45, 126.46, 83.01, 61.54, 41.27, 28.28, 25.29, 24.05, 22.29. HRMS (ESI) calculated for C<sub>13</sub>H<sub>21</sub>NO<sub>3</sub>Na [M+Na]<sup>+</sup> *m/z* 262.1418, found 262.1418.

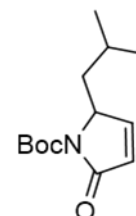

**tert-butyl-2-isopropyl-5-oxo-2,5-dihydro-1H-pyrrole-1-carboxylate (3c)** Boc-d<sup>2,3</sup>γVal-OPfp (409 mg, 1 mmol) was dissolved in 10 mL of dry DMF, in a 25 ml of round bottom flask with a magnetic stirring bar. Then DIPEA (0.87 mL, 5 mmol) was added to the above solution, the resulting mixture was stirred vigorously at room temperature under an N<sub>2</sub> atmosphere for 2 h. The progress of the reaction is monitored by TLC, after completion of the reaction workup was done by diluting the reaction mixture with ethyl acetate (100 mL), followed by successive washings with 10% HCl (3 × 40 mL), 10% Na<sub>2</sub>CO<sub>3</sub> (3 × 40 mL) and brine solution (2 × 30 mL). The organic layer was dried over anhydrous Na<sub>2</sub>SO<sub>4</sub> and concentrated under reduced pressure. The reaction mixture was purified by column chromatography (5–25% EtOAc in hexane) to provide a **3c** as an oily liquid in 79% yield.

R<sub>f</sub> = 0.58 (20% EtOAc in hexane). [α]<sub>D</sub><sup>25</sup> = +4 (c 0.1, MeOH). <sup>1</sup>H NMR (400 MHz, Chloroform-*d*) δ 7.12 (dd, *J* = 6.2, 2.0 Hz, 1H), 6.14 (dd, *J* = 6.2, 1.7 Hz, 1H), 4.55 (dt, *J* = 3.9, 1.8 Hz, 1H), 2.59 (qt, *J* = 6.9, 3.5 Hz, 1H), 1.54 (s, 9H), 1.09 (d, *J* = 7.1 Hz, 3H), 0.66 (d, *J* = 6.9 Hz, 3H). <sup>13</sup>C NMR (101 MHz, Chloroform-*d*) δ 169.70, 149.73, 147.94, 127.92, 83.00, 67.41, 28.99, 28.23, 19.63, 14.98. HRMS (ESI) calculated for C<sub>12</sub>H<sub>19</sub>NO<sub>3</sub>Na [M+Na]<sup>+</sup> *m/z* 248.1262, found 248.1261.

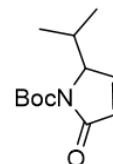

**tert-butyl-2-methyl-5-oxo-2,5-dihydro-1H-pyrrole-1-carboxylate (3d)** Boc-d<sup>2,3</sup>γAla-OPfp (381 mg, 1 mmol) was dissolved in 10 mL of dry DMF, in a 25 ml of round bottom flask with a magnetic stirring bar. Then DIPEA (0.87 mL, 5 mmol) was added to the above solution, the resulting mixture was stirred vigorously at room temperature under an N<sub>2</sub> atmosphere for 2 h. The progress of the reaction is monitored by TLC, after completion of the reaction workup was done by diluting the reaction mixture with ethyl acetate (100 mL), followed by successive washings with 10% HCl (3 × 40 mL), 10% Na<sub>2</sub>CO<sub>3</sub> (3 × 40 mL) and brine solution (2 × 30 mL). The organic layer was dried over anhydrous Na<sub>2</sub>SO<sub>4</sub> and concentrated under reduced pressure. The reaction mixture was purified by column chromatography (5–25% EtOAc in hexane) to provide a **3d** as an oily liquid in 87% yield.

R<sub>f</sub> = 0.52 (20% EtOAc in hexane). [α]<sub>D</sub><sup>25</sup> = +6 (c 0.1, MeOH). <sup>1</sup>H NMR (400 MHz, Chloroform-*d*) δ 7.09 (dd, *J* = 6.1, 2.0 Hz, 1H), 6.06 (dd, *J* = 6.1, 1.7 Hz, 1H), 4.61 (dt, *J* = 6.7, 1.8 Hz, 1H), 1.56 (s, 9H), 1.43 (d, *J* = 6.7 Hz, 3H). <sup>13</sup>C NMR (101 MHz, Chloroform-*d*) δ 169.30, 151.90, 149.53, 126.07, 83.04, 58.53, 28.28, 18.30. HRMS (ESI) calculated for C<sub>11</sub>H<sub>18</sub>NO<sub>3</sub>Na [M+Na]<sup>+</sup> *m/z* 220.0949, found 220.0955.

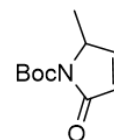

**tert-butyl-2-((S)-sec-butyl)-5-oxo-2,5-dihydro-1H-pyrrole-1-carboxylate (3e)** Boc-d<sup>2,3</sup>γIle-OPfp (423 mg, 1 mmol) was dissolved in 10 mL of dry DMF, in a 25 ml of round bottom flask with a magnetic stirring bar. Then DIPEA (0.87 mL, 5 mmol) was added to the above solution, the resulting mixture was stirred vigorously at room temperature under an N<sub>2</sub> atmosphere for 2 h. The progress of the reaction is monitored by TLC, after completion of the reaction workup was done by diluting the reaction mixture with ethyl acetate (100 mL), followed by successive washings with 10% HCl (3 × 40 mL), 10% Na<sub>2</sub>CO<sub>3</sub> (3 × 40 mL) and brine solution (2 × 30 mL). The organic layer was dried over anhydrous Na<sub>2</sub>SO<sub>4</sub> and concentrated under reduced pressure. The reaction mixture was purified by column chromatography (5–25% EtOAc in hexane) to provide a **3e** as an oily liquid in 82% yield.

R<sub>f</sub> = 0.60 (20% EtOAc in hexane). [α]<sub>D</sub><sup>25</sup> = -6 (c 0.1, MeOH). <sup>1</sup>H NMR (400 MHz, Chloroform-*d*, mixture of two isomers in ratio of 1:1) δ 7.12 (dd, *J* = 6.2, 2.0 Hz, 1H), 7.07 (dd, *J* = 6.1, 2.1 Hz, 1H), 6.12 (dd, *J* = 6.2, 1.7 Hz, 1H), 6.09 (dd, *J* = 6.2, 1.8 Hz, 1H), 4.64 (dt, *J* = 4.0, 1.9 Hz, 1H), 4.55 (dt, *J* = 3.9, 1.9 Hz, 1H), 2.30 (dddd, *J* = 20.7, 10.5, 7.0, 3.2 Hz, 2H), 1.53 (s, 18H), 1.44 – 1.23 (m, 4H), 1.06 (d, *J* = 7.1 Hz, 3H), 1.02 (t, *J* = 7.4 Hz, 3H), 0.82 (t, *J* = 7.4 Hz, 3H), 0.61 (d, *J* = 6.9 Hz, 3H). <sup>13</sup>C NMR (101 MHz, Chloroform-*d*) δ 169.79, 169.77, 149.66, 149.57, 148.31, 148.12, 127.86, 127.40, 82.94, 67.60, 66.10, 35.87, 35.81, 28.22, 28.20, 27.31, 22.59, 16.59, 12.66, 12.37, 12.26. HRMS (ESI) calculated for C<sub>13</sub>H<sub>21</sub>NO<sub>3</sub>Na [M+Na]<sup>+</sup> *m/z* 262.1418, found 262.1418.

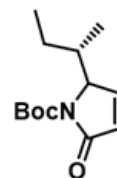

**tert-butyl-2-oxo-5-phenyl-2,5-dihydro-1H-pyrrole-1-carboxylate (3f)** Boc-d<sup>2,3</sup>γPhg-OPfp (443 mg, 1 mmol) was dissolved in 10 mL of dry DMF, in a 25 ml of round bottom flask with a magnetic stirring bar. Then DIPEA (0.87 mL, 5 mmol) was added to the above solution, the resulting mixture was stirred vigorously at room temperature under an N<sub>2</sub> atmosphere for 2 h. The progress of the reaction is monitored by TLC, after completion of the reaction workup was done by diluting the reaction mixture with ethyl acetate (100 mL), followed by successive washings with 10% HCl (3 × 40 mL), 10% Na<sub>2</sub>CO<sub>3</sub> (3 × 40 mL) and brine solution (2 × 30 mL). The organic layer was dried over anhydrous Na<sub>2</sub>SO<sub>4</sub> and concentrated under reduced pressure. The reaction mixture was purified by column chromatography (5–25% EtOAc in hexane) to provide a **3f** as a white solid with an 87% yield.

$R_f = 0.59$  (20% EtOAc in hexane). M.p. 102-104 °C.  $[\alpha]_D^{25} = 0$  ( $c$  0.1, MeOH).  $^1\text{H NMR}$  (400 MHz, Chloroform- $d$ )  $\delta$  7.38 – 7.31 (m, 3H), 7.21 – 7.18 (m, 2H), 7.06 (dd,  $J = 6.0$ , 2.2 Hz, 1H), 6.16 (dd,  $J = 6.0$ , 1.7 Hz, 1H), 5.53 (t,  $J = 2.0$  Hz, 1H), 1.27 (s, 9H).  $^{13}\text{C NMR}$  (101 MHz, Chloroform- $d$ )  $\delta$  170.00, 150.31, 148.78, 135.85, 129.00, 128.62, 126.62, 125.44, 83.09, 66.39, 27.89. HRMS (ESI) calculated for  $\text{C}_{15}\text{H}_{17}\text{NO}_3\text{Na}$   $[\text{M}+\text{Na}]^+ m/z$  282.1105, found 282.1103.

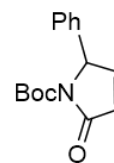

**benzyl 2-isobutyl-5-oxo-2,5-dihydro-1H-pyrrole-1-carboxylate (3g)** Cbz- $d^{2,3}\gamma$ Leu-OPfp (457 mg, 1 mmol) was dissolved in 10 mL of dry DMF, in a 25 ml of round bottom flask with a magnetic stirring bar. Then DIPEA (0.87 mL, 5 mmol) was added to the above solution, the resulting mixture was stirred vigorously at room temperature under an  $\text{N}_2$  atmosphere for 2 h. The progress of the reaction is monitored by TLC, after completion of the reaction workup was done by diluting the reaction mixture with ethyl acetate (100 mL), followed by successive washings with 10% HCl ( $3 \times 40$  mL), 10%  $\text{Na}_2\text{CO}_3$  ( $3 \times 40$  mL) and brine solution ( $2 \times 30$  mL). The organic layer was dried over anhydrous  $\text{Na}_2\text{SO}_4$  and concentrated under reduced pressure. The reaction mixture was purified by column chromatography (5–25% EtOAc in hexane) to provide a **3g** as an oily liquid with an 81% yield.

$R_f = 0.55$  (30% EtOAc in hexane).  $[\alpha]_D^{25} = +4$  ( $c$  0.1, MeOH).  $^1\text{H NMR}$  (400 MHz, Chloroform- $d$ )  $\delta$  7.46 – 7.42 (m, 2H), 7.39 – 7.32 (m, 3H), 7.27 (dd,  $J = 6.1$ , 2.0 Hz, 1H), 6.10 (dd,  $J = 6.1$ , 1.7 Hz, 1H), 5.36 (d,  $J = 12.3$  Hz, 1H), 5.27 (d,  $J = 12.3$  Hz, 1H), 4.66 (ddd,  $J = 7.5$ , 3.8, 1.9 Hz, 1H), 2.0 – 1.94 (m, 1H), 1.69 – 1.62 (m, 1H), 1.45 – 1.38 (m, 1H), 0.93 (d,  $J = 6.6$  Hz, 3H), 0.88 (d,  $J = 6.6$  Hz, 3H).  $^{13}\text{C NMR}$  (101 MHz, Chloroform- $d$ )  $\delta$  168.92, 151.42, 150.93, 135.42, 128.71, 128.52, 128.34, 126.17, 68.07, 61.60, 40.96, 25.24, 23.85, 22.14. HRMS (ESI) calculated for  $\text{C}_{16}\text{H}_{20}\text{NO}_3$   $[\text{M}+\text{H}]^+ m/z$  274.1443, found 274.1439.

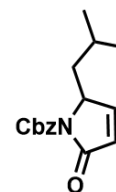

## B) Synthesis of $\alpha,\beta$ -unsaturated gamma lactam from ONp esters.

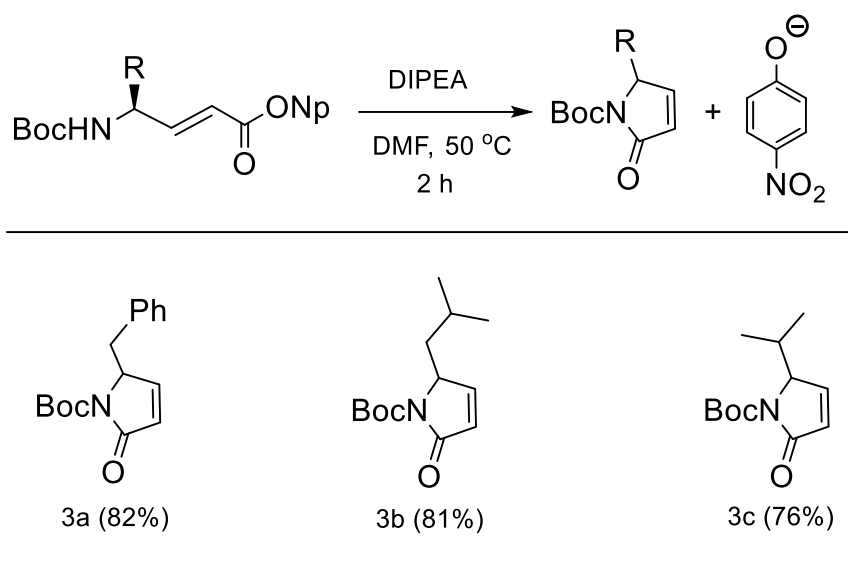

**Scheme S5:** Synthesis of  $N$ -Boc-( $Z$ )- $\alpha,\beta$ -unsaturated  $\gamma$ -lactam from ONp esters of ( $E$ )-vinyllogous amino acids.

BocHN- $d^{2,3}\gamma$ Xxx-ONp (1 mmol) was dissolved in 10 mL of DMF, to this solution DIPEA (0.87 mL, 5 mmol) was added. The reaction mixture was stirred 2 h at 50 °C. After completion of the reaction (monitored by TLC), workup was done by diluting the reaction mixture with ethyl acetate (50 mL), followed by successive washings with 10% HCl (3  $\times$  40 mL), 10% Na<sub>2</sub>CO<sub>3</sub> (3  $\times$  40 mL) and brine solution (2  $\times$  30 mL). The organic layer was dried over anhydrous Na<sub>2</sub>SO<sub>4</sub> and concentrated under reduced pressure. The obtained crude product was purified through a silica gel (60-120 mesh) column by ethyl acetate and petroleum ethers mixture as eluent.

***tert*-butyl-2-benzyl-5-oxo-2,5-dihydro-1*H*-pyrrole-1-carboxylate (3a)** Boc- $d^{2,3}\gamma$ Phe-ONp (428 mg, 1 mmol) was dissolved in 10 mL of dry DMF, in a 25 ml of a round bottom flask with a magnetic stirring bar. Then DIPEA (0.87 mL, 5 mmol) was added to the above solution, the resulting mixture was stirred vigorously at 50 °C under an N<sub>2</sub> atmosphere for 2 h. The progress of the reaction is monitored by TLC, after completion of the reaction workup was done by diluting the reaction mixture with ethyl acetate (100 mL), followed by successive washings with 10% HCl (3  $\times$  40 mL), 10% Na<sub>2</sub>CO<sub>3</sub> (3  $\times$  40 mL) and brine solution (2  $\times$  30 mL). The organic layer was dried over anhydrous Na<sub>2</sub>SO<sub>4</sub> and concentrated under reduced pressure. The



reaction mixture was purified by column chromatography (5–25% EtOAc in hexane) to provide **3a** as an oily liquid in 82% yield.

$R_f = 0.59$  (20% EtOAc in hexane). M.p. 99–102 °C.  $[\alpha]_D^{25} = +6$  ( $c$  0.1, MeOH).  $^1\text{H}$  NMR (400 MHz, Chloroform- $d$ )  $\delta$  7.34 – 7.27 (m, 3H), 7.17 – 7.13 (m, 2H), 7.02 (dd,  $J = 6.1$ , 2.0 Hz, 1H), 6.02 (dd,  $J = 6.1$ , 1.6 Hz, 1H), 4.75 (ddt,  $J = 9.5$ , 3.8, 1.8 Hz, 1H), 3.55 (dd,  $J = 13.1$ , 3.9 Hz, 1H), 2.74 (dd,  $J = 13.1$ , 9.5 Hz, 1H), 1.63 (s, 9H).  $^{13}\text{C}$  NMR (101 MHz, Chloroform- $d$ )  $\delta$  169.20, 150.05, 149.64, 135.76, 129.51, 128.84, 127.30, 126.79, 83.34, 63.51, 38.74, 28.37. HRMS (ESI) calculated for  $\text{C}_{16}\text{H}_{19}\text{NO}_3\text{Na}$   $[\text{M}+\text{Na}]^+$   $m/z$  296.1262, found 296.1262.

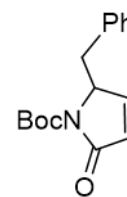

**tert-butyl-2-isobutyl-5-oxo-2,5-dihydro-1H-pyrrole-1-carboxylate (3b)** Boc- $d^{2,3}\gamma$ Leu-ONp (394 mg, 2 mmol) was dissolved in 10 mL of dry DMF, in a 25 ml of round bottom flask with a magnetic stirring bar. Then DIPEA (1.74 mL, 5 mmol) was added to the above solution, the resulting mixture was stirred vigorously at 50 °C under an  $\text{N}_2$  atmosphere for 2 h. The progress of the reaction is monitored by TLC, after completion of the reaction workup was done by diluting the reaction mixture with ethyl acetate (100 mL), followed by successive washings with 10% HCl ( $3 \times 40$  mL), 10%  $\text{Na}_2\text{CO}_3$  ( $3 \times 40$  mL) and brine solution ( $2 \times 30$  mL). The organic layer was dried over anhydrous  $\text{Na}_2\text{SO}_4$  and concentrated under reduced pressure. The reaction mixture was purified by column chromatography (5–25% EtOAc in hexane) to provide **3b** as an oily liquid in 81% yield.

$R_f = 0.60$  (20% EtOAc in hexane).  $[\alpha]_D^{25} = +2$  ( $c$  0.1, MeOH).  $^1\text{H}$  NMR (400 MHz, Chloroform- $d$ )  $\delta$  7.22 (dd,  $J = 6.1$ , 2.0 Hz, 1H), 6.08 (dd,  $J = 6.1$ , 1.6 Hz, 1H), 4.59 (ddt,  $J = 9.9$ , 3.7, 1.8 Hz, 1H), 1.69 (ddd,  $J = 9.3$ , 4.7, 2.5 Hz, 1H), 1.55 (s, 9H), 1.47 – 1.40 (m, 2H), 0.99 (d,  $J = 6.6$  Hz, 3H), 0.94 (d,  $J = 6.6$  Hz, 3H).  $^{13}\text{C}$  NMR (101 MHz, Chloroform- $d$ )  $\delta$  169.43, 150.69, 149.45, 126.46, 83.01, 61.54, 41.27, 28.28, 25.29, 24.05, 22.29. HRMS (ESI) calculated for  $\text{C}_{13}\text{H}_{21}\text{NO}_3\text{Na}$   $[\text{M}+\text{Na}]^+$   $m/z$  262.1418, found 262.1418.

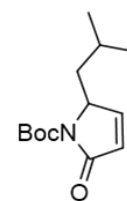

**tert-butyl-2-isopropyl-5-oxo-2,5-dihydro-1H-pyrrole-1-carboxylate (3c)** Boc-d<sup>2,3</sup>Val-ONp (380 mg, 1 mmol) was dissolved in 10 mL of dry DMF, in a 25 ml of round bottom flask with a magnetic stirring bar. Then DIPEA (0.87 mL, 5 mmol) was added to the above solution, the resulting mixture was stirred vigorously at 50 °C under an N<sub>2</sub> atmosphere for 2 h. The progress of the reaction is monitored by TLC, after completion of the reaction workup was done by diluting the reaction mixture with ethyl acetate (100 mL), followed by successive washings with 10% HCl (3 × 40 mL), 10% Na<sub>2</sub>CO<sub>3</sub> (3 × 40 mL) and brine solution (2 × 30 mL). The organic layer was dried over anhydrous Na<sub>2</sub>SO<sub>4</sub> and concentrated under reduced pressure. The reaction mixture was purified by column chromatography (5–25% EtOAc in hexane) to provide a **3c** as an oily liquid with a 76% yield.

R<sub>f</sub> = 0.58 (20% EtOAc in hexane). [α]<sub>D</sub><sup>25</sup> = +4 (c 0.1, MeOH). <sup>1</sup>H NMR (400 MHz, Chloroform-*d*) δ 7.12 (dd, *J* = 6.2, 2.0 Hz, 1H), 6.14 (dd, *J* = 6.2, 1.7 Hz, 1H), 4.55 (dt, *J* = 3.9, 1.8 Hz, 1H), 2.59 (qt, *J* = 6.9, 3.5 Hz, 1H), 1.54 (s, 9H), 1.09 (d, *J* = 7.1 Hz, 3H), 0.66 (d, *J* = 6.9 Hz, 3H). <sup>13</sup>C NMR (101 MHz, Chloroform-*d*) δ 169.70, 149.73, 147.94, 127.92, 83.00, 67.41, 28.99, 28.23, 19.63, 14.98. HRMS (ESI) calculated for C<sub>12</sub>H<sub>19</sub>NO<sub>3</sub>Na [M+Na]<sup>+</sup> *m/z* 248.1262, found 248.1261.

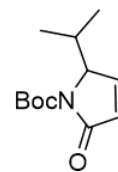

## 5. Determining the kinetic parameters of lactamization reaction by UV experiment.

The samples of various concentrations are prepared by dissolving (**4a-4c**) in DMF solvent. All spectra were recorded in presence of 5 eq. of DIPEA. The molar extinction coefficient ( $\epsilon$ ) for the 4-nitrophenolate ion was obtained  $4110 \text{ M}^{-1} \text{ cm}^{-1}$  by plotting the absorbance against concentration, under the reaction condition. As shown in Fig. S2, the 4-nitrophenolate ion uniquely absorbs at 431 nm, which was used to spectrophotometrically monitor the formation of the product, as the 4-nitrophenolate ion releases from the substrate as the reaction proceeds shown in Scheme 5. To measure the kinetic parameter of the lactamization reaction, we use ( $29.42 \mu\text{M}$  solutions of **4a/4b/4c** and 5 eq. of DIPEA), where the first-order equation reduces to  $\ln[A]_t = \ln[A]_0 - kt$  ( $[A]_t$ : concentration of a reactant at time  $t$ ;  $[A]_0$ : initial concentration of reactant;  $k$ : rate constant). The standard curve was first generated to determine the product concentration at a given time from the observed absorbance at 431 nm. The observed absorbance was used to determine the value of  $[A]_t$ . Plotting  $\ln[A]_t$  against time yielded the rate constant, using linear fit method. All the kinetic experiments were performed at  $50^\circ\text{C}$ .

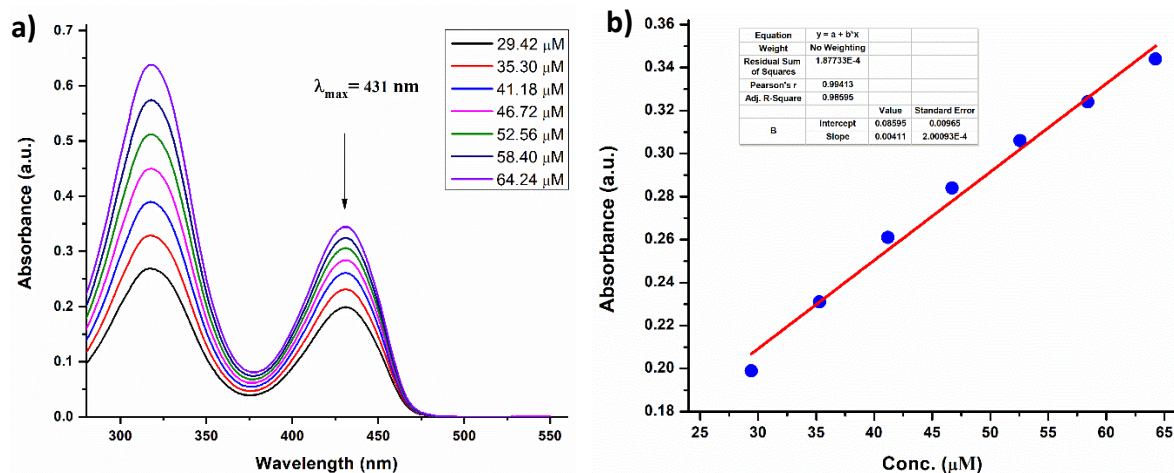

**Fig. S2:** **a)**  $\lambda_{\text{max}}$  431 nm of 4-nitrophenolate ion under reaction conditions. **b)** Plot of absorbance against concentration.

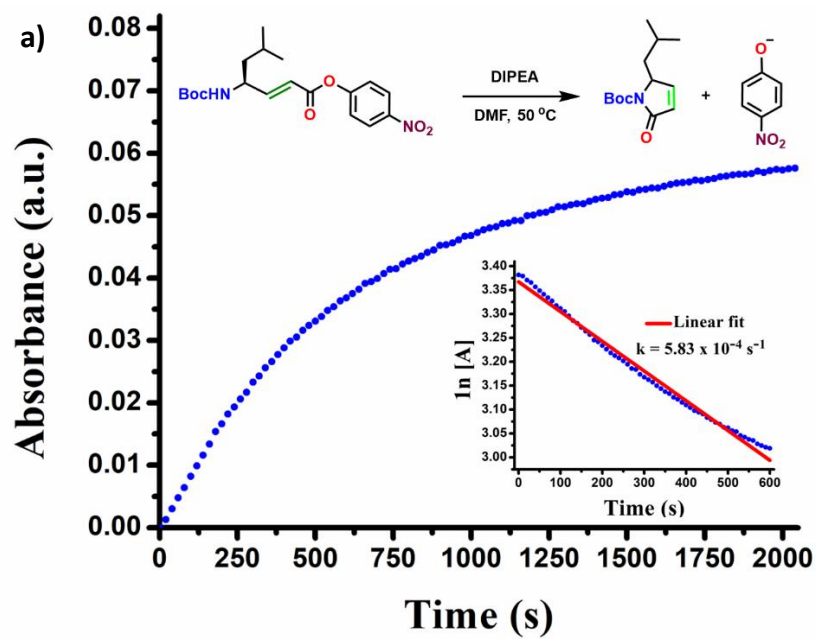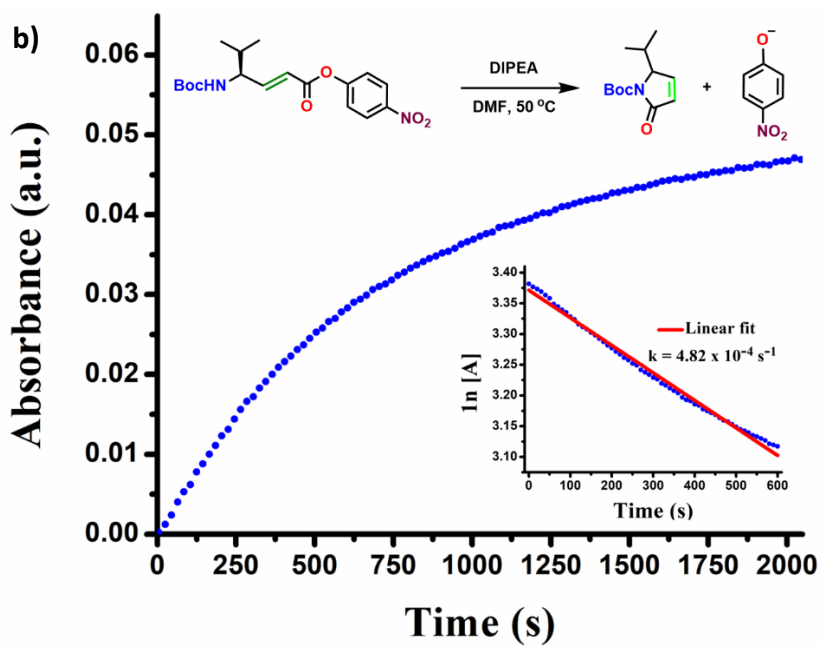

**Fig. S3:** Kinetic analysis for the transformation of ONp esters into the corresponding  $\alpha,\beta$ -unsaturated  $\gamma$ -lactams (a) **4b** to **3b** and (b) **4c** to **3c**.

## 6. Determination of the extent of activation by $^1\text{H}$ NMR and IR Experiment

The comparison of  $^1\text{H}$  NMR spectra of Boc-dg-Leu-OPfp (**2b**), Boc-dg-Leu-ONp (**4b**), and Boc-dg-Leu-OH (**1b**) shows that a significant increase in chemical shift of protons H1 and H2 in active esters due to the strong electron-withdrawing nature of -ONp and -OPfp groups shown in Fig. S4. The difference in chemical shifts shown in **Table S2** is more for H2 protons compared to H1 protons for both the active esters, this is because H2 is present near the electron-withdrawing groups.

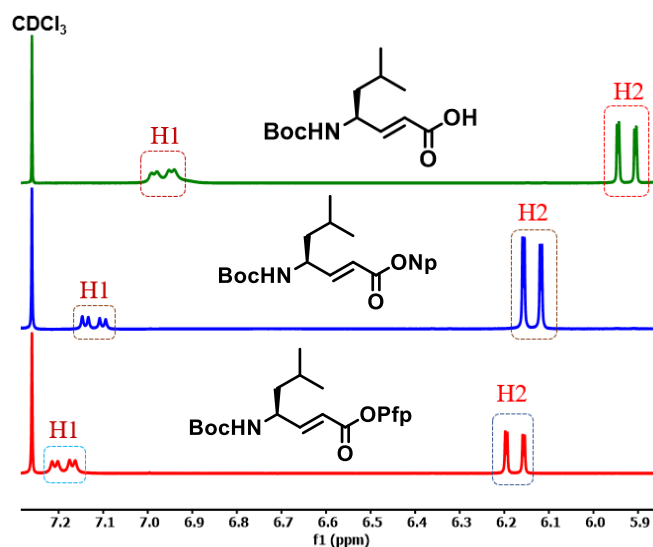

**Fig. S4:** Combined Partial  $^1\text{H}$  NMR spectra of OPfp, ONp esters of  $\alpha,\beta$ -unsaturated  $\gamma$ -amino acid and  $\alpha,\beta$ -unsaturated  $\gamma$ -amino acid.

**Table S2:** Comparison of chemical shifts of active esters with  $\alpha,\beta$ -unsaturated  $\gamma$ -amino acid.

| Active Ester | $\Delta\delta = (\delta_{\text{active ester}} - \delta_{\text{acid}})$ in ppm |      |
|--------------|-------------------------------------------------------------------------------|------|
|              | H1                                                                            | H2   |
| <b>4b</b>    | 0.15                                                                          | 0.21 |
| <b>2b</b>    | 0.22                                                                          | 0.25 |

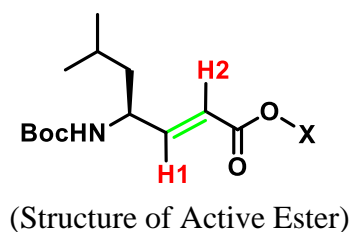

The active esters can be arranged for their activating properties in approximately the order: ONp < OPfp. One of the pieces of evidence of this reactivity order was obtained from the comparison IR stretching frequency of the active ester Boc-dg-Phe-OPfp (**2a**) 1766  $\text{cm}^{-1}$  and Boc-dg-Phe-ONp (**4a**) 1743  $\text{cm}^{-1}$  with their parent molecule Boc-dg-Phe-OH (**1a**) 1699  $\text{cm}^{-1}$  shown in Fig. S5. It has been observed that Boc-dg-Phe-OPfp (**2a**) undergoes lactamization reaction at room temperature due to the more activating nature of the -OPfp group confirmed by the IR stretching frequency. However, Boc-dg-Phe-ONp (**4a**) undergoes the same reaction at elevated temperature (50 °C) due to the less activating nature of the -ONp group confirmed by the IR stretching frequency.

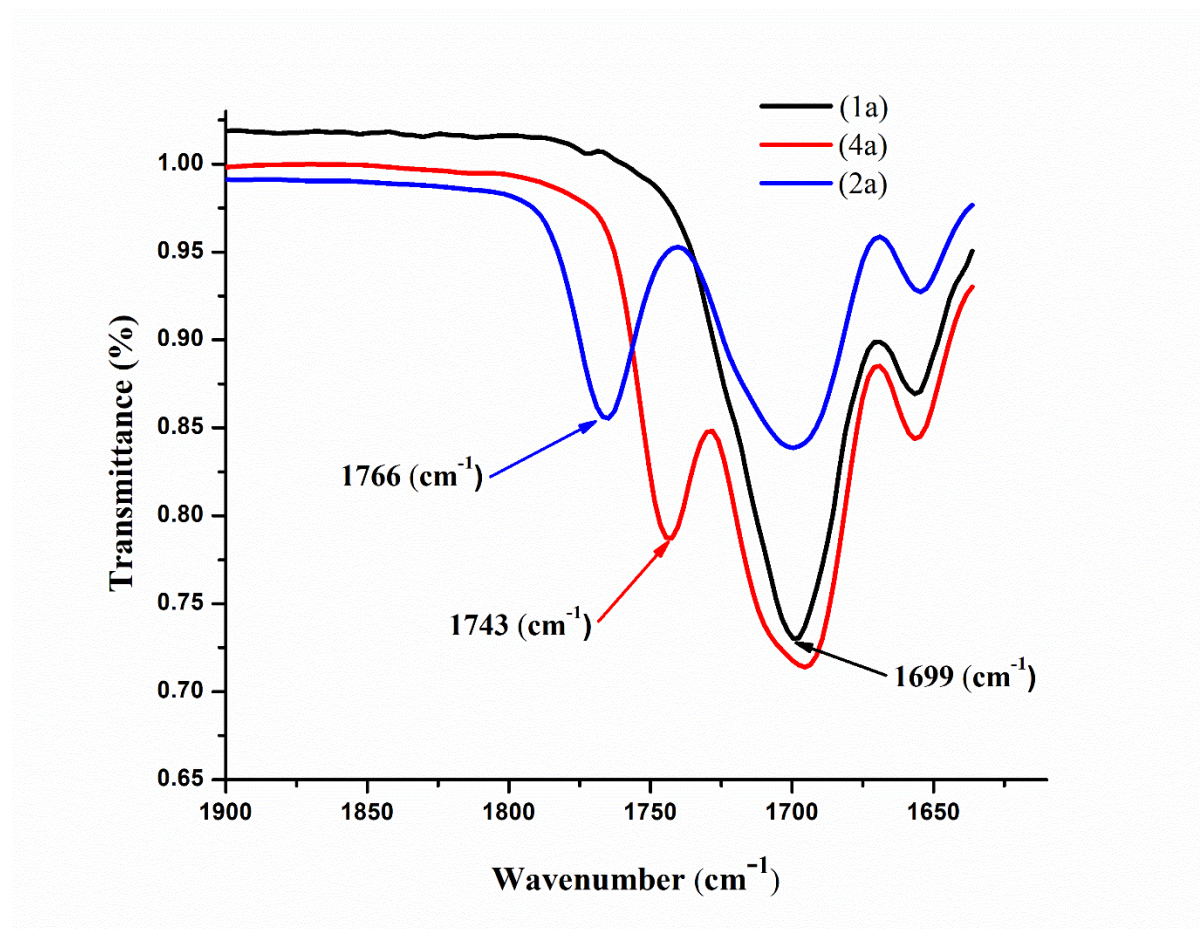

**Fig. S5:** Combined Partial IR spectra of active esters and  $\alpha,\beta$ -unsaturated  $\gamma$ -amino acid.

## 7. ORTEP Diagrams

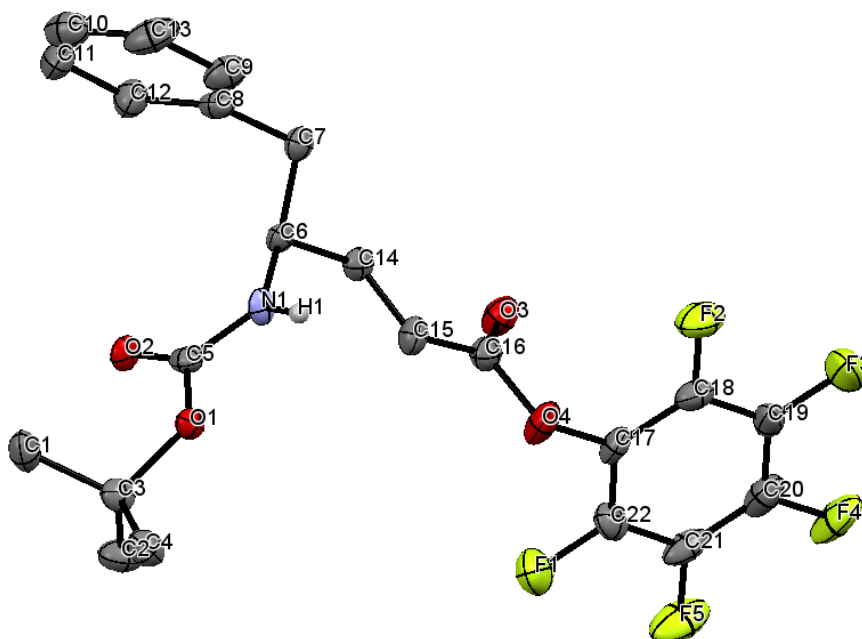

**Fig. S6:** ORTEP diagram of compound **2a**. H-atoms are omitted for clarity. Ellipsoids are drawn at 50% probability (CCDC no 2212219).

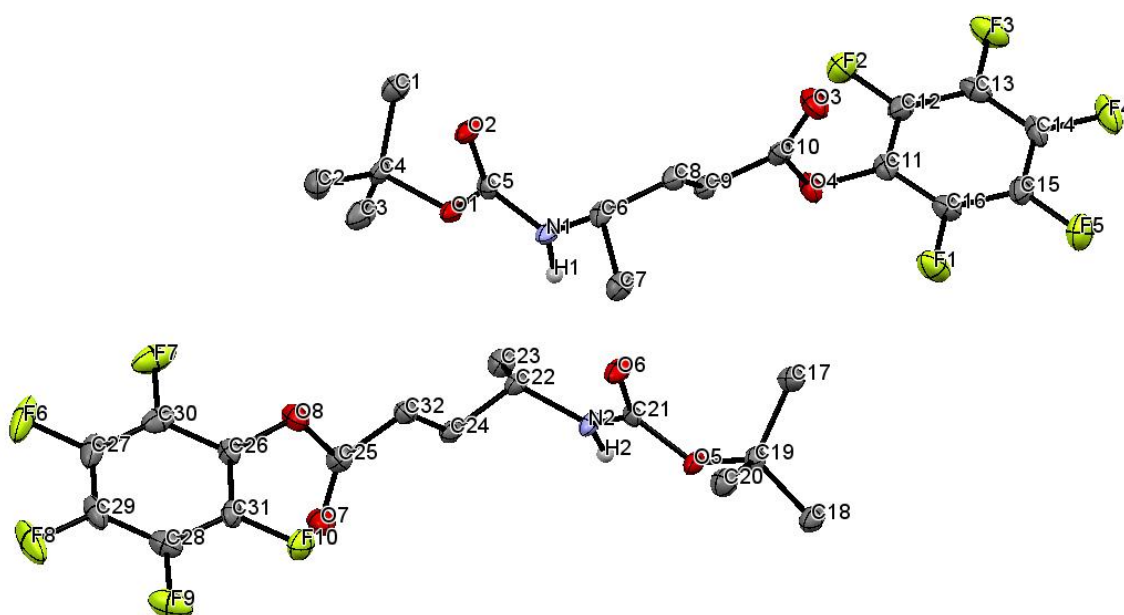

**Fig. S7:** ORTEP diagram of compound **2d**. H-atoms are omitted for clarity. Ellipsoids are drawn at 50% probability (CCDC no 2212205).

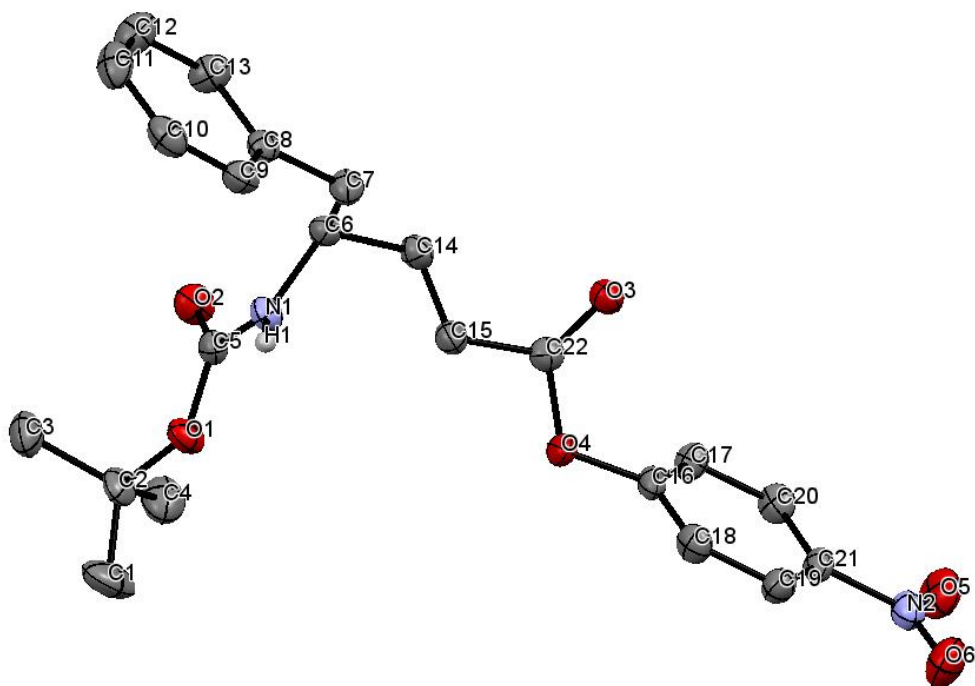

**Fig. S8:** ORTEP diagram of compound **4a**. H-atoms are omitted for clarity. Ellipsoids are drawn at 50% probability (CCDC no 2212221).

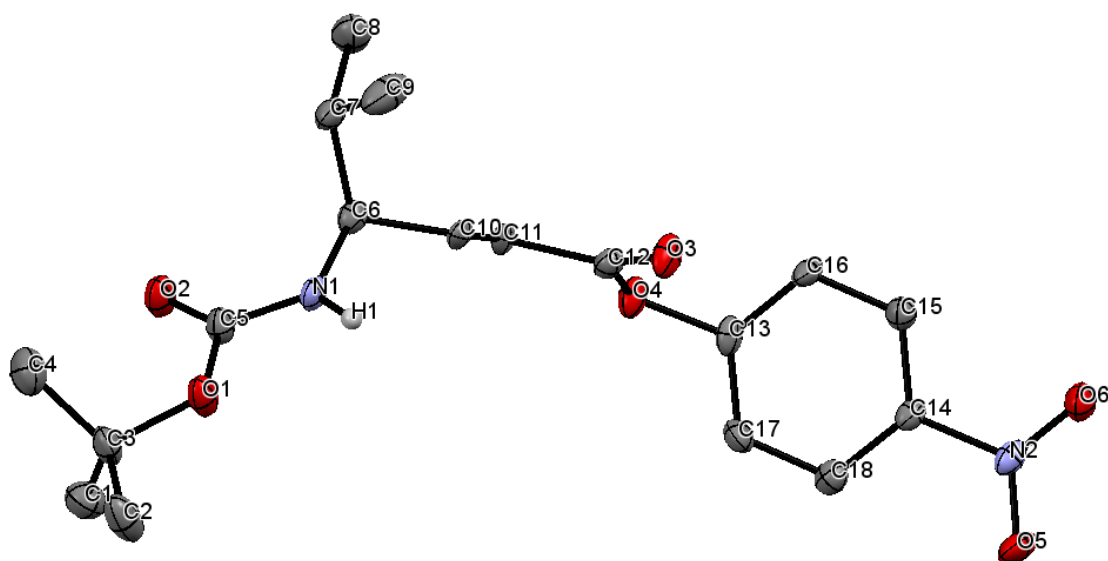

**Fig. S9:** ORTEP diagram of compound **4c**. H-atoms are omitted for clarity. Ellipsoids are drawn at 50% probability (CCDC no 2212220).



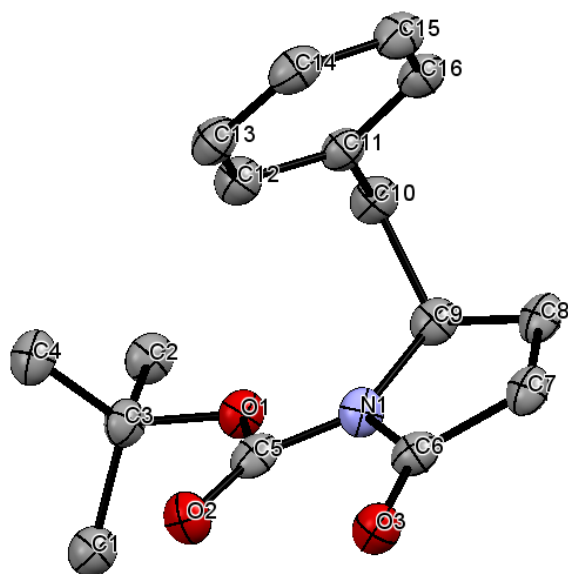

**Fig. S10:** ORTEP diagram of compound **3a**. H-atoms are omitted for clarity. Ellipsoids are drawn at 50% probability (CCDC no 2225785).

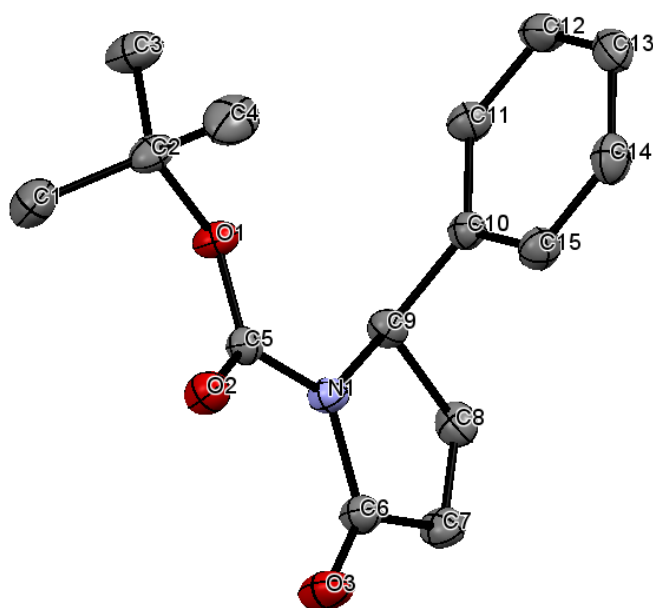

**Fig. S11:** ORTEP diagram of compound **3f**. H-atoms are omitted for clarity. Ellipsoids are drawn at 50% probability (CCDC no 2212223).

## Crystallographic Information:

**Boc-dg-Phe-OPfp 2a:** Crystals of **2a** were grown by slow evaporation from a solution of aqueous methanol at room temperature. A single crystal ( $0.16 \times 0.05 \times 0.12$  mm) was mounted on a loop with a small amount of paraffin oil. The X-ray data were collected at 120K temperature on a Bruker APEX(II) DUO CCD diffractometer using Mo  $K_{\alpha}$  radiation ( $\lambda = 0.71073 \text{ \AA}$ ),  $\omega$ -scans ( $2\theta = 56.896$ ), for a total of 15970 independent reflections. Space group P 21,  $a = 10.469$  (6),  $b = 9.455$  (6),  $c = 11.567$  (6),  $\alpha = 90$ ,  $\beta = 110.556$  (14),  $\gamma = 90$ ,  $V = 1072.1(10) \text{ \AA}^3$ , Monoclinic,  $Z = 2$  for chemical formula  $C_{22}H_{20}F_5N_4O_4$ , with one molecule in asymmetric unit;  $\rho$  calcd =  $1.417 \text{ g cm}^{-3}$ ,  $\mu = 0.125 \text{ mm}^{-1}$ ,  $F(000) = 472$ ,  $R_{\text{int}} = 0.1422$ . The structure was obtained by direct methods using SHELXS-97. The final R value was 0.0687 ( $wR_2 = 0.1476$ ) 4988 observed reflections ( $F_o \geq 4\sigma(|F_o|)$ ) and 293 variables,  $S = 0.893$ .

**Boc-dg-Ala-OPfp 2d:** Crystals of **2d** were grown by slow evaporation from a solution of aqueous methanol at room temperature. A single crystal ( $0.14 \times 0.1 \times 0.06$  mm) was mounted on a loop with a small amount of paraffin oil. The X-ray data were collected at 150K temperature on a Bruker APEX(II) DUO CCD diffractometer using Mo  $K_{\alpha}$  radiation ( $\lambda = 0.71073 \text{ \AA}$ ),  $\omega$ -scans ( $2\theta = 49.654$ ), for a total of 16604 independent reflections. Space group P 1,  $a = 6.2002$  (9),  $b = 9.3687$  (12),  $c = 15.799$  (2),  $\alpha = 101.093$  (4),  $\beta = 99.079$  (4),  $\gamma = 105.428$  (4),  $V = 846.7$  (2)  $\text{ \AA}^3$ , Triclinic,  $Z = 2$  for chemical formula  $C_{16}H_{16}F_5N_4O_4$ , with two molecules in asymmetric unit;  $\rho$  calcd =  $1.496 \text{ g cm}^{-3}$ ,  $\mu = 0.142 \text{ mm}^{-1}$ ,  $F(000) = 392$ ,  $R_{\text{int}} = 0.0407$ . The structure was obtained by direct methods using SHELXS-97. The final R value was 0.0326 ( $wR_2 = 0.0631$ ) 5740 observed reflections ( $F_o \geq 4\sigma(|F_o|)$ ) and 478 variables,  $S = 1.023$ .

**Boc-dg-Phe-ONp 4a:** Crystals of **4a** were grown by slow evaporation from a solution of aqueous methanol at room temperature. A single crystal ( $0.15 \times 0.07 \times 0.06$  mm) was mounted on a loop with a small amount of paraffin oil. The X-ray data were collected at 150K temperature on a Bruker APEX(II) DUO CCD diffractometer using Cu  $K_{\alpha}$  radiation ( $\lambda = 1.54178 \text{ \AA}$ ),  $\omega$ -scans ( $2\theta = 66.768$ ), for a total of 26912 independent reflections. Space group P 21 21 21,  $a = 6.1910$  (7),  $b = 14.7184$  (16),  $c = 22.774$  (3),  $\alpha = 90$ ,  $\beta = 90$ ,  $\gamma = 90$ ,  $V = 2075.2$  (4)  $\text{ \AA}^3$ , Orthorhombic,  $Z = 4$  for chemical formula  $C_{22}H_{24}N_2O_6$ , with one molecule in

asymmetric unit;  $\rho$  calcd = 1.32 gcm<sup>-3</sup>,  $\mu$  = 0.803 mm<sup>-1</sup>, F (000) = 872, R<sub>int</sub> = 0.1486. The structure was obtained by direct methods using SHELXS-97. The final R value was 0.0408 (wR2 = 0.0922) 3681 observed reflections ( $F_0 \geq 4\sigma(|F_0|)$ ) and 275 variables, S = 1.037.

**Boc-dg-Val-ONp 4c:** Crystals of **4c** were grown by slow evaporation from a solution of aqueous methanol at room temperature. A single crystal (0.12 × 0.07 × 0.05 mm) was mounted on a loop with a small amount of paraffin oil. The X-ray data were collected at 150K temperature on a Bruker APEX(II) DUO CCD diffractometer using Mo K $\alpha$  radiation ( $\lambda$  = 0.71073 Å),  $\omega$ -scans ( $2\theta$  = 57.602), for a total of 26912 independent reflections. Space group P 21, a = 6.216 (3), b = 5.362 (3), c = 28.415 (13),  $\alpha$  = 90,  $\beta$  = 95.424(12),  $\gamma$  = 90, V = 942.8(8) Å<sup>3</sup>, Monoclinic, Z = 2 for chemical formula C<sub>18</sub>H<sub>24</sub>N<sub>2</sub>O<sub>6</sub>, with one molecule in asymmetric unit;  $\rho$  calcd = 1.284 gcm<sup>-3</sup>,  $\mu$  = 0.097 mm<sup>-1</sup>, F (000) = 388, R<sub>int</sub> = 0.1842. The structure was obtained by direct methods using SHELXS-97. The final R value was 0.0899 (wR2 = 0.2110) 4704 observed reflections ( $F_0 \geq 4\sigma(|F_0|)$ ) and 241 variables, S = 1.085.

**tert-butyl 2-benzyl-5-oxo-2,5-dihydro-1H-pyrrole-1-carboxylate 3a:** Crystals of **3a** were grown by slow evaporation from a solution of ethyl acetate-pet ether at room temperature. A single crystal (0.11 × 0.6 × 0.08 mm) was mounted on a loop with a small amount of paraffin oil. The X-ray data were collected at 100K temperature on a Bruker APEX(II) DUO CCD diffractometer using Mo K $\alpha$  radiation ( $\lambda$  = 0.71073 Å),  $\omega$ -scans ( $2\theta$  = 56.76), for a total of 20509 independent reflections. Space group P 21/n, a = 6.146 (3), b = 14.129 (7), c = 16.674 (8),  $\alpha$  = 90,  $\beta$  = 99.499 (14),  $\gamma$  = 90, V = 1427.9 (12) Å<sup>3</sup>, Monoclinic, Z = 4 for chemical formula C<sub>16</sub>H<sub>19</sub>N O<sub>3</sub>, with one molecule in the asymmetric unit;  $\rho$  calcd = 1.271 gcm<sup>-3</sup>,  $\mu$  = 0.088 mm<sup>-1</sup>, F (000) = 5, R<sub>int</sub> = 0.0525. The structure was obtained by direct methods using SHELXS-97. The final R value was 0.0723 (wR2 = 0.1772) 3576 observed reflections ( $F_0 \geq 4\sigma(|F_0|)$ ) and 185 variables, S = 0.790.

**tert-butyl-2-oxo-5-phenyl-2,5-dihydro-1H-pyrrole-1-carboxylate 3f:** Crystals of **3f** were grown by slow evaporation from a solution of ethyl acetate-pet ether at room temperature. A single crystal (0.13 × 0.8 × 0.05 mm) was mounted on a loop with a small amount of paraffin oil. The X-ray data were collected at 150K temperature on a Bruker APEX(II) DUO CCD

diffractometer using Mo K $\alpha$  radiation ( $\lambda = 0.71073 \text{ \AA}$ ),  $\omega$ -scans ( $2\theta = 56.76$ ), for a total of 20800 independent reflections. Space group P 21/c,  $a = 6.2063 (11)$ ,  $b = 13.323 (3)$ ,  $c = 16.945 (3)$ ,  $\alpha = 90$ ,  $\beta = 91.668 (6)$ ,  $\gamma = 90$ ,  $V = 1400.6 (4) \text{ \AA}^3$ , Monoclinic,  $Z = 4$  for chemical formula C<sub>15</sub> H<sub>17</sub> N O<sub>3</sub>, with one molecule in the asymmetric unit;  $\rho_{\text{calcd}} = 1.23 \text{ gcm}^{-3}$ ,  $\mu = 0.086 \text{ mm}^{-1}$ ,  $F(000) = 552$ ,  $R_{\text{int}} = 0.0525$ . The structure was obtained by direct methods using SHELXS-97. The final R value was 0.0416 ( $wR2 = 0.0915$ ) 3509 observed reflections ( $F_o \geq 4\sigma(|F_o|)$ ) and 176 variables,  $S = 1.022$ .

## 8. $^1\text{H}$ , $^{13}\text{C}$ , and $^{19}\text{F}$ NMR of all compounds

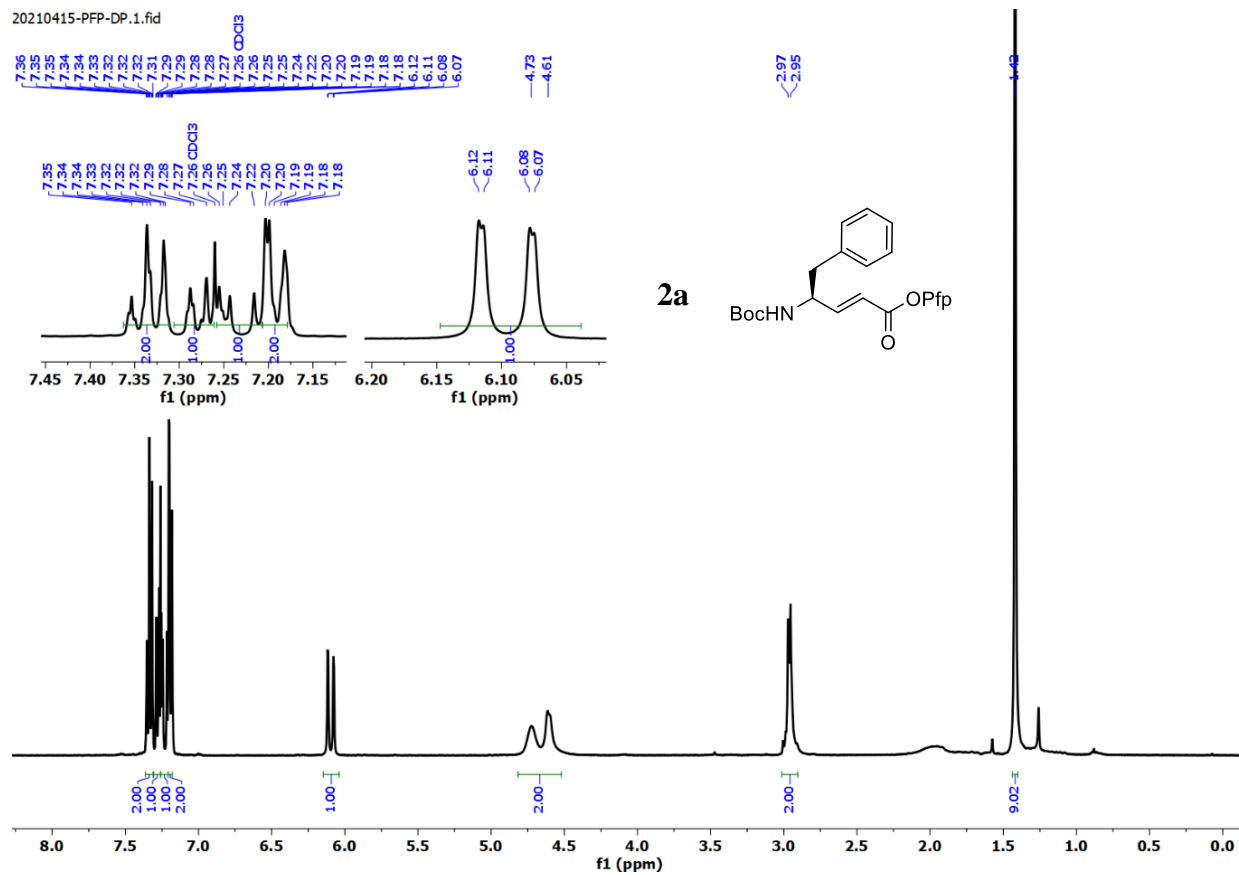

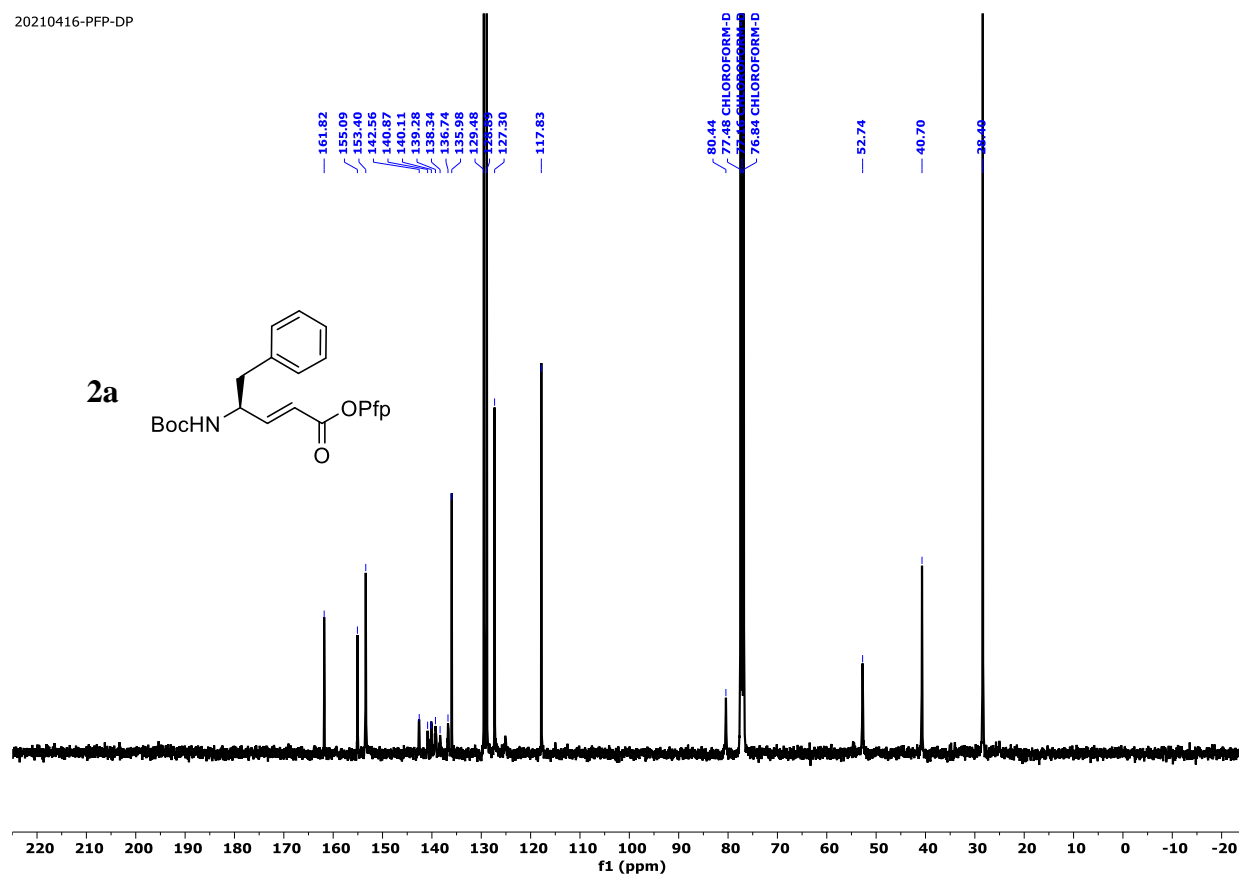

-152.90  
-158.07  
-162.40

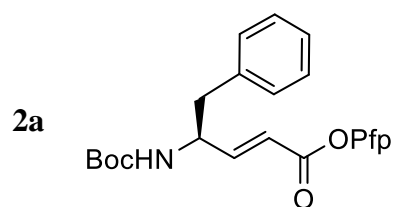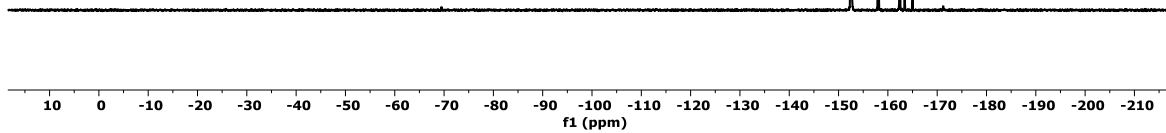

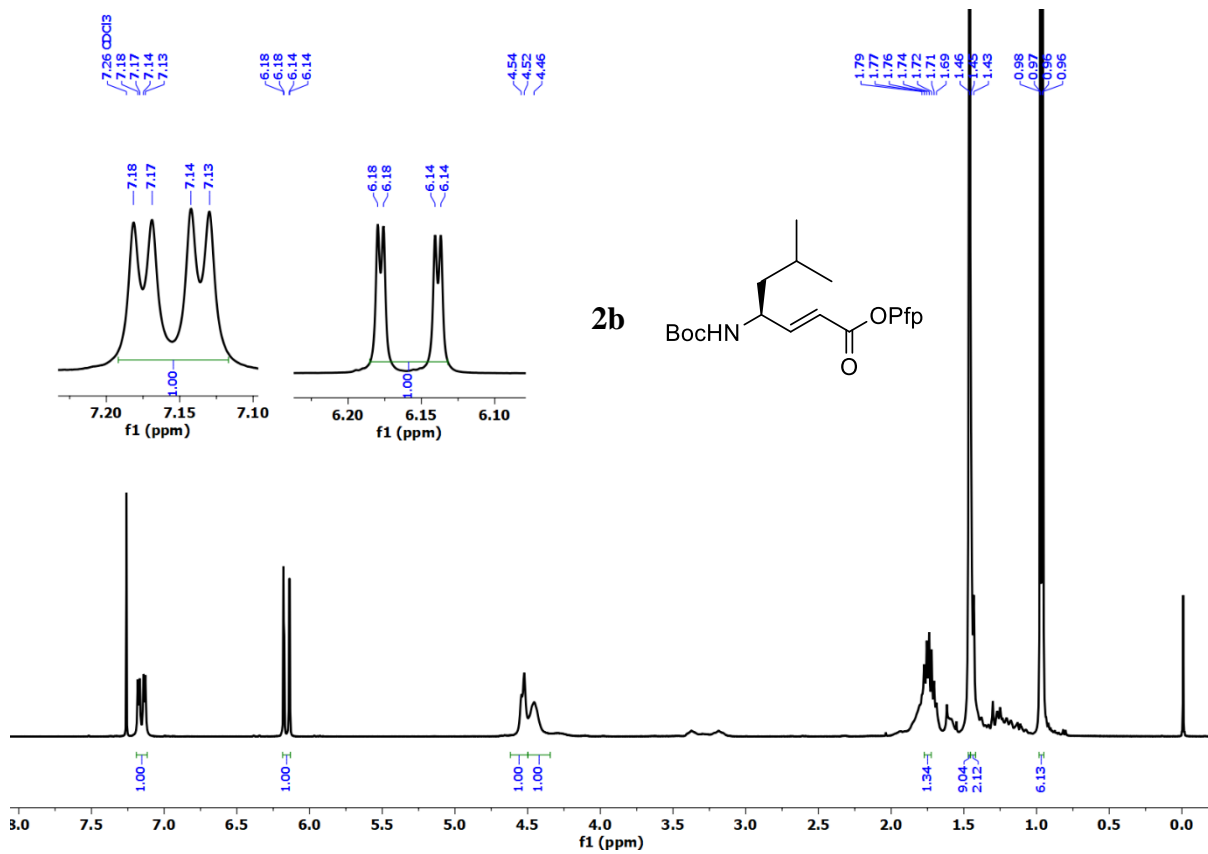



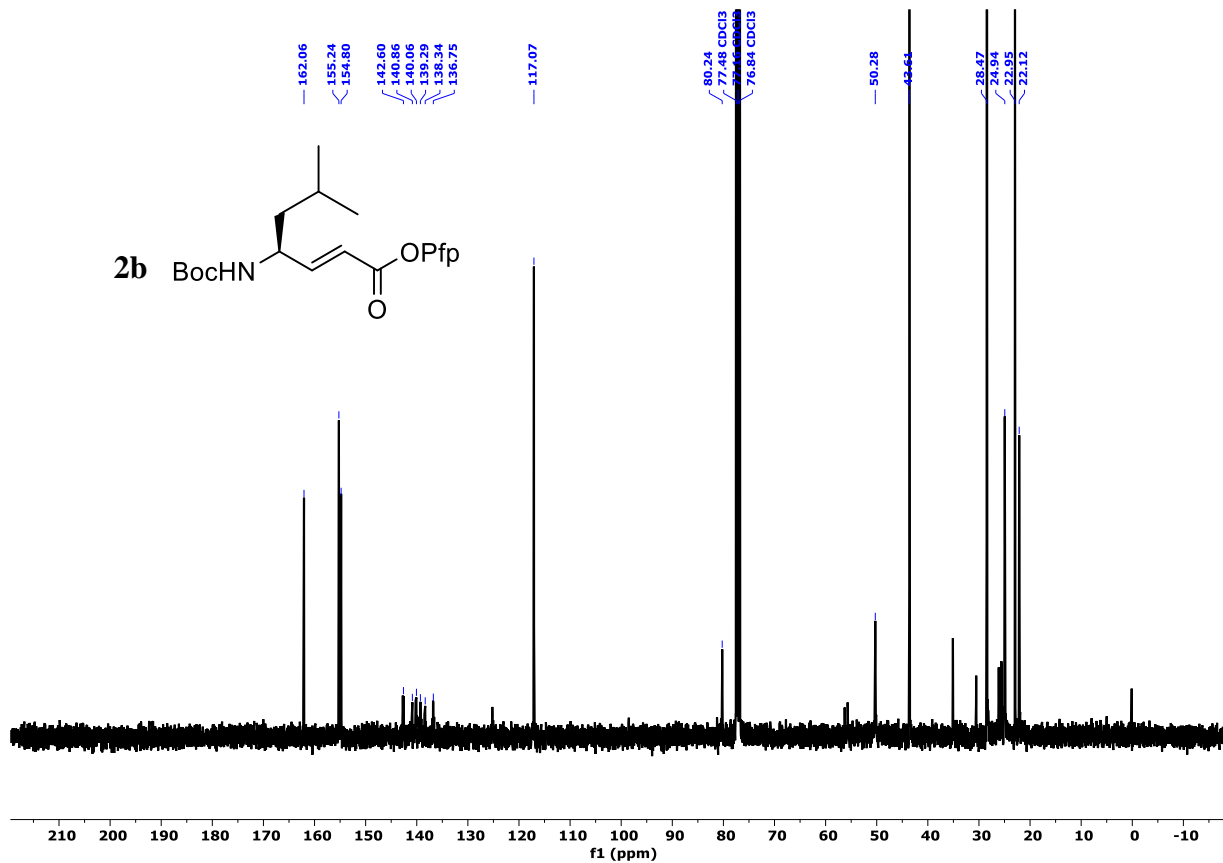

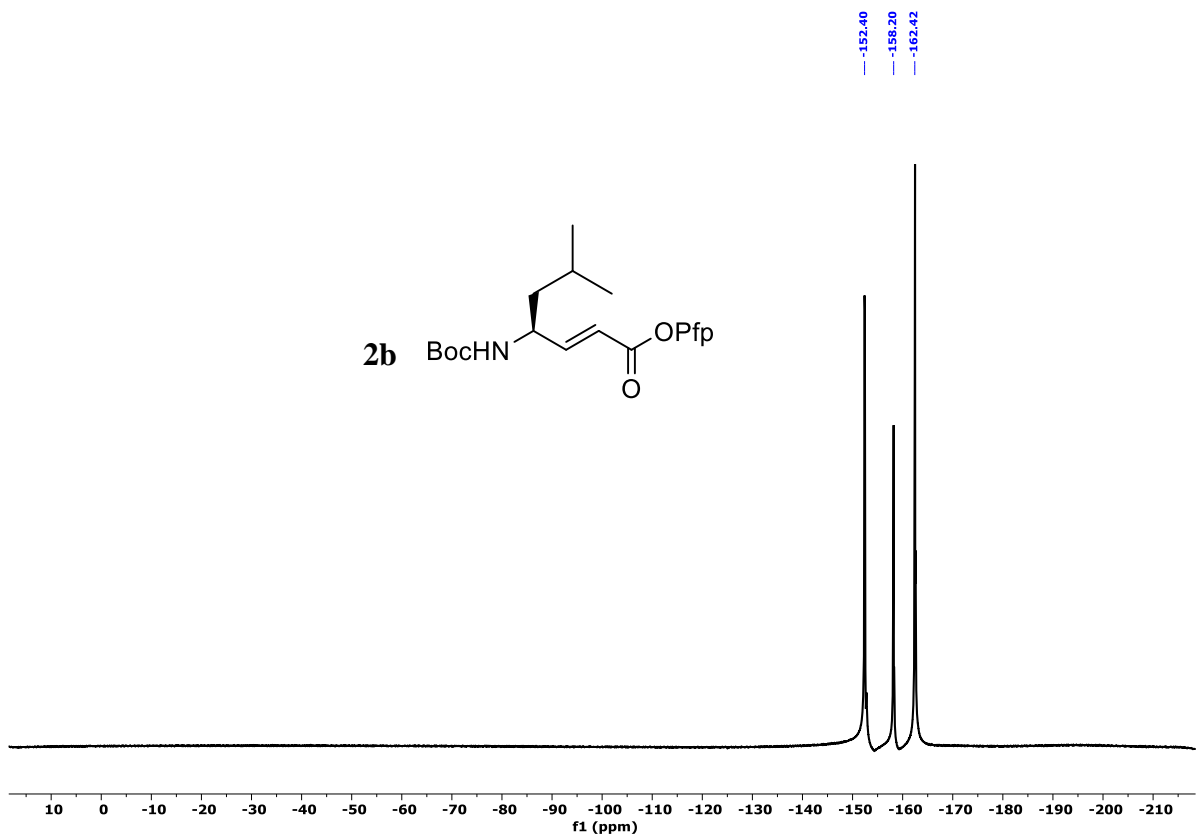

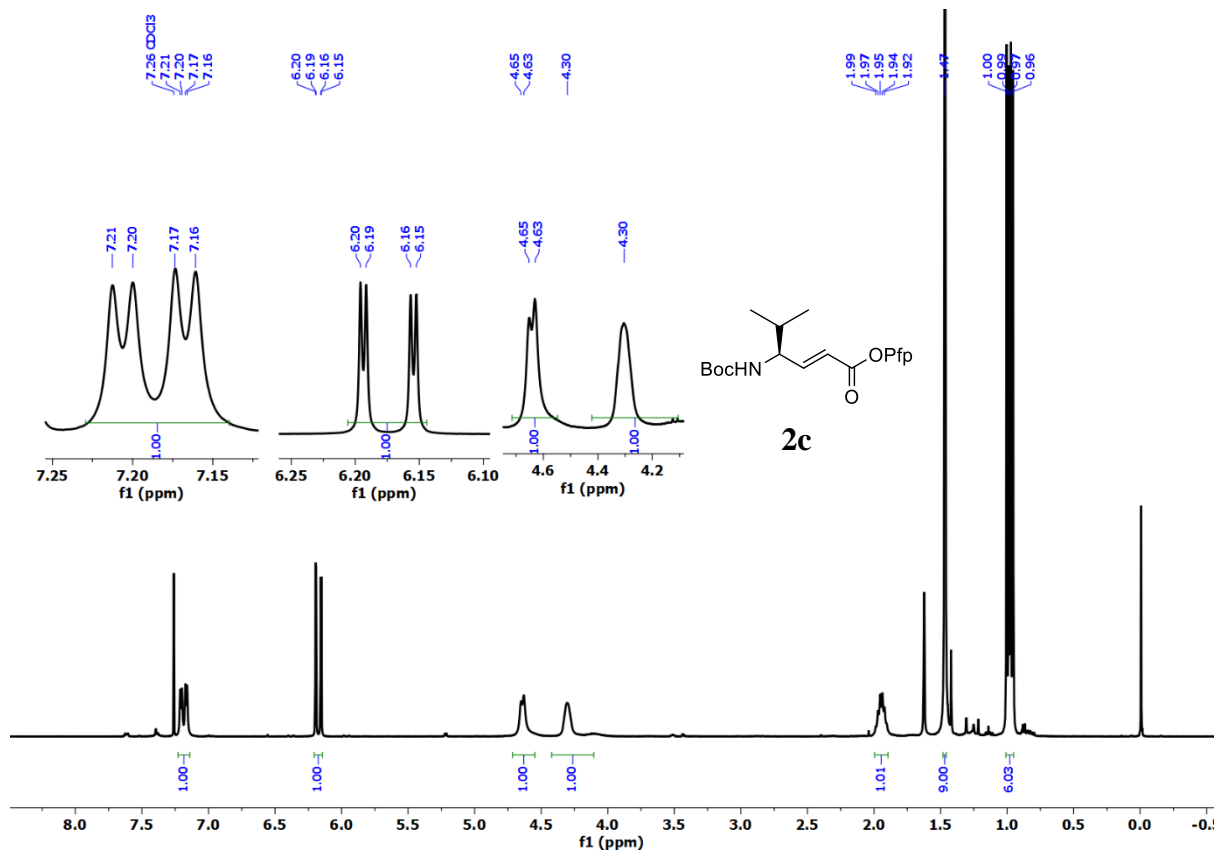

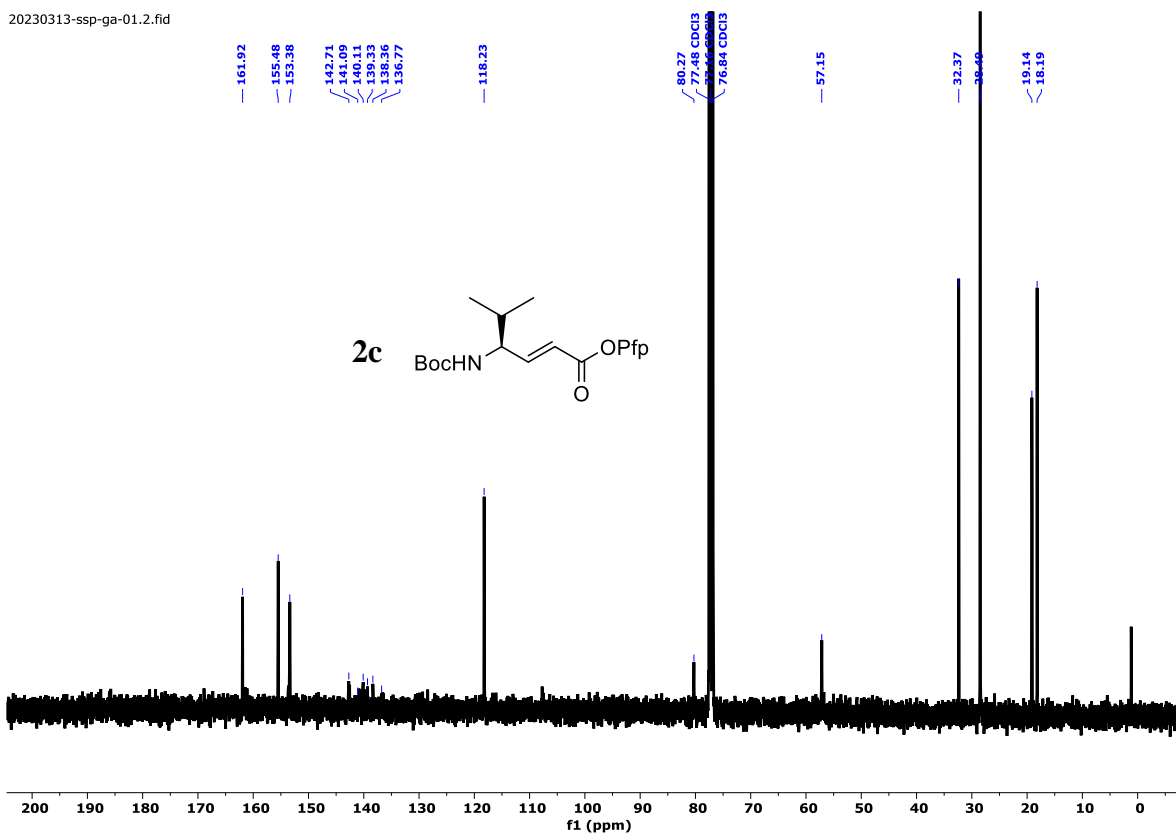

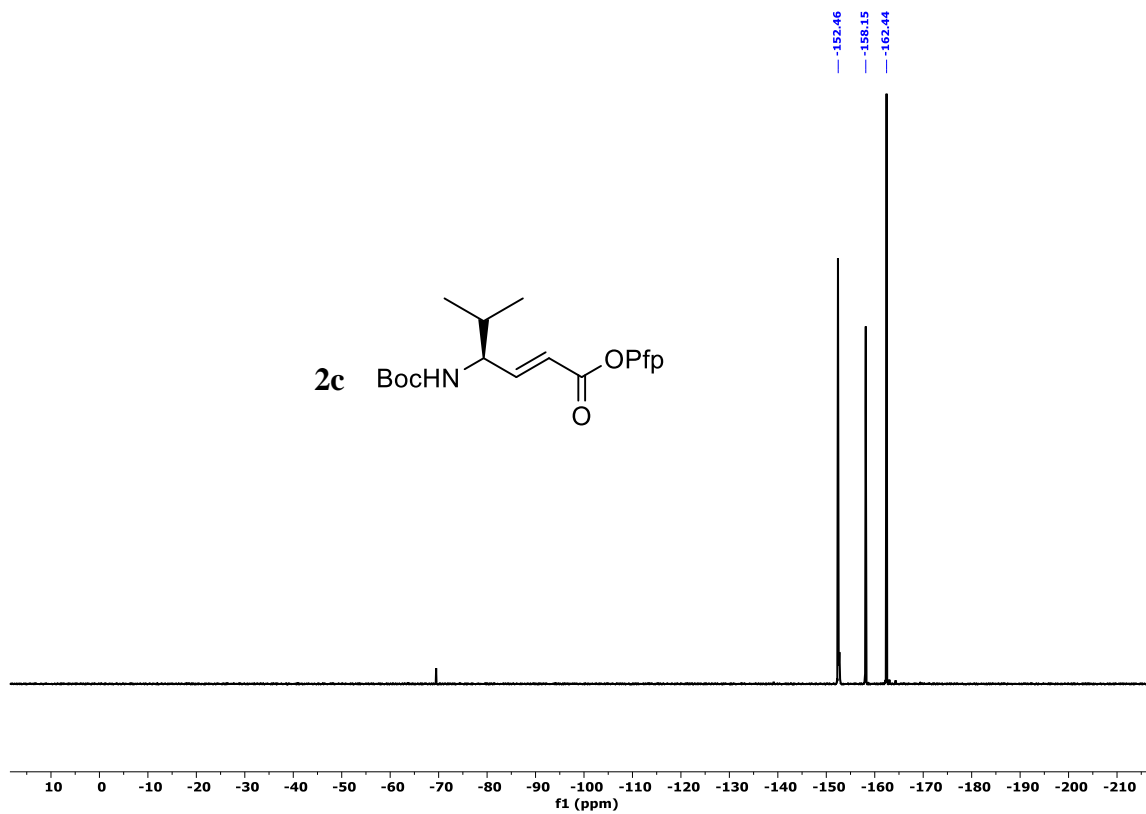

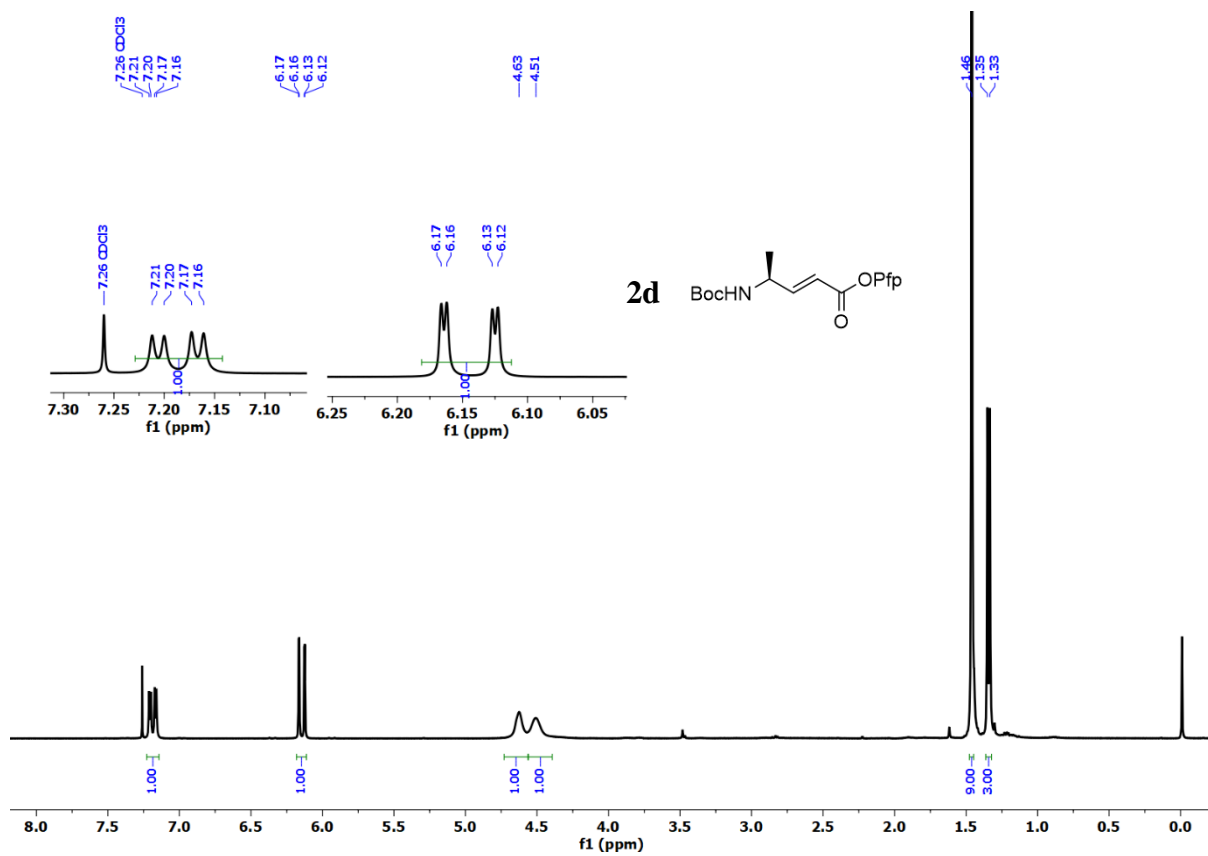

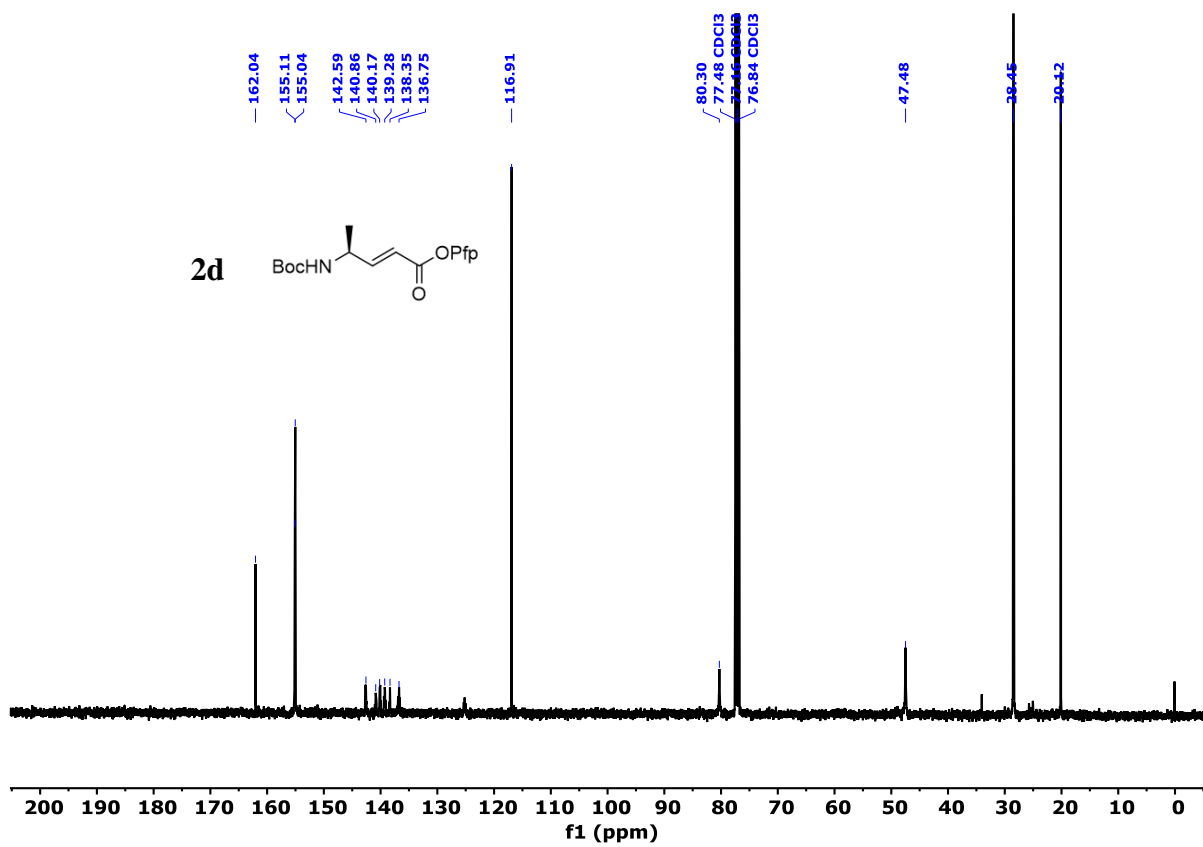

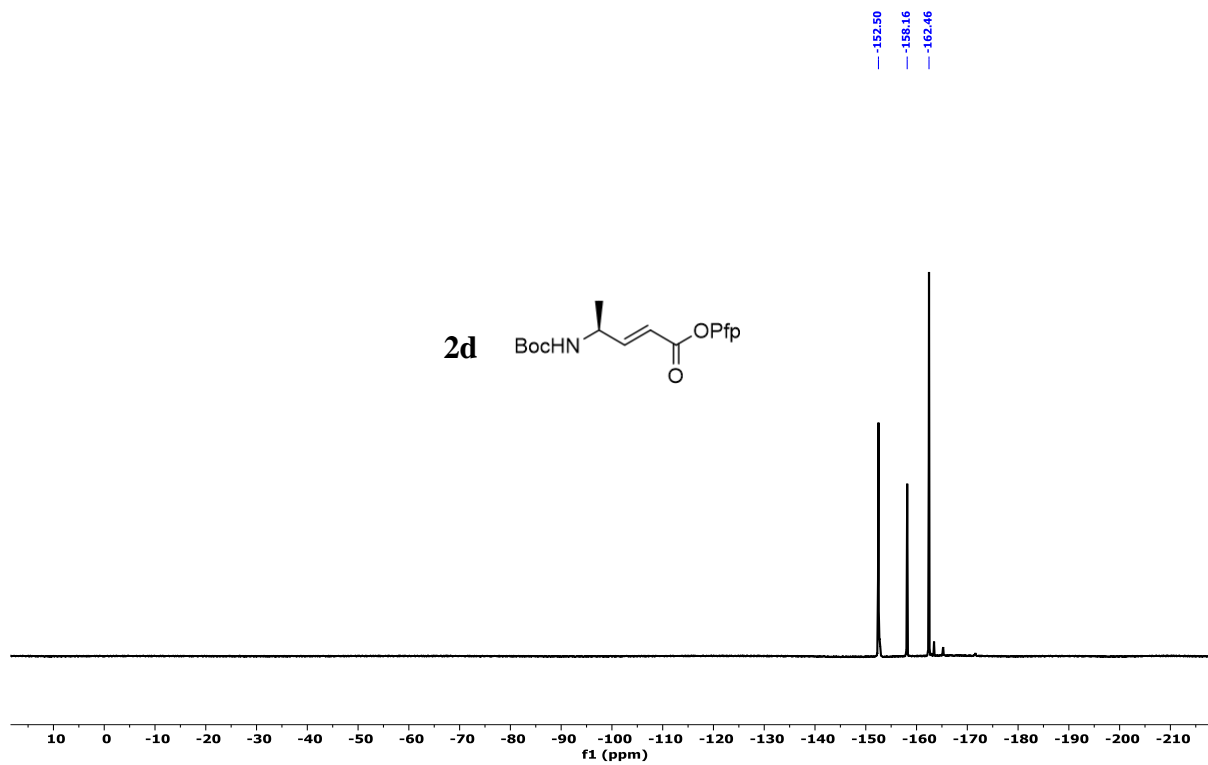



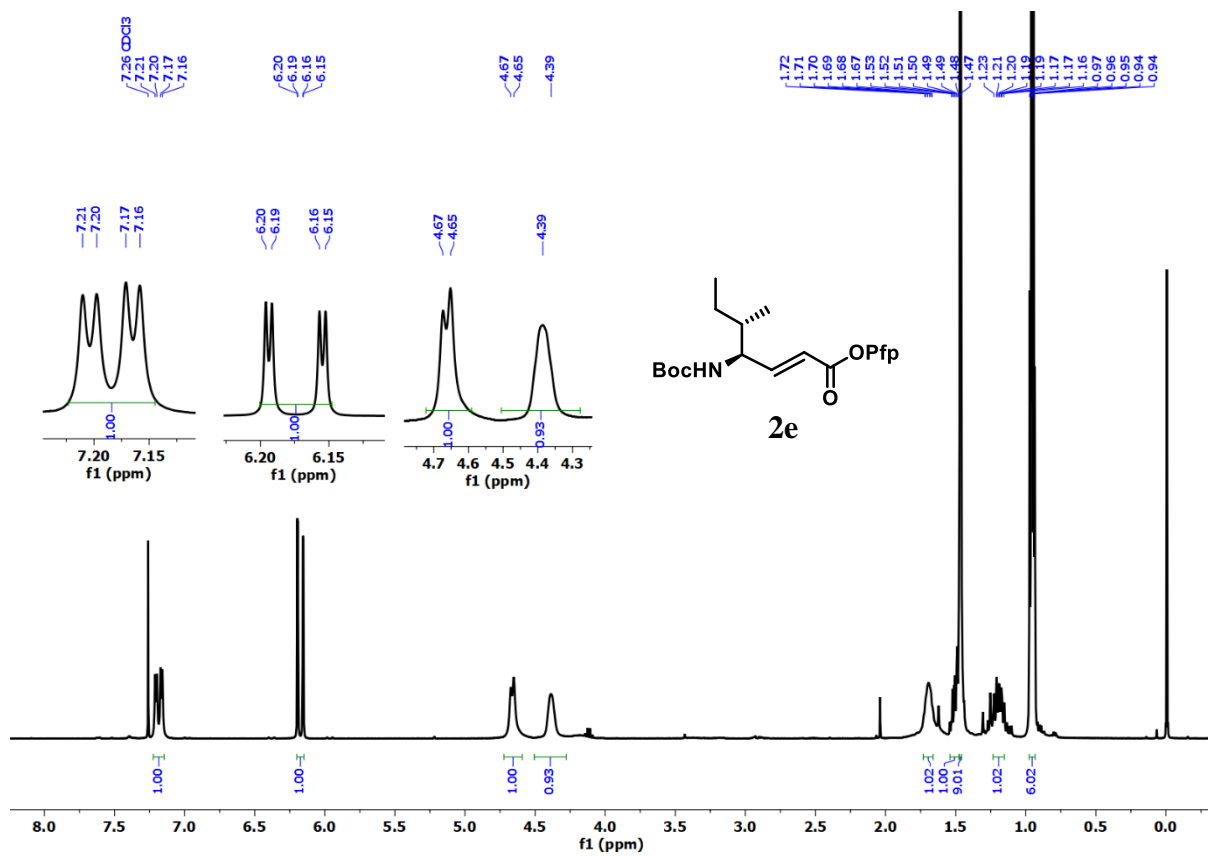

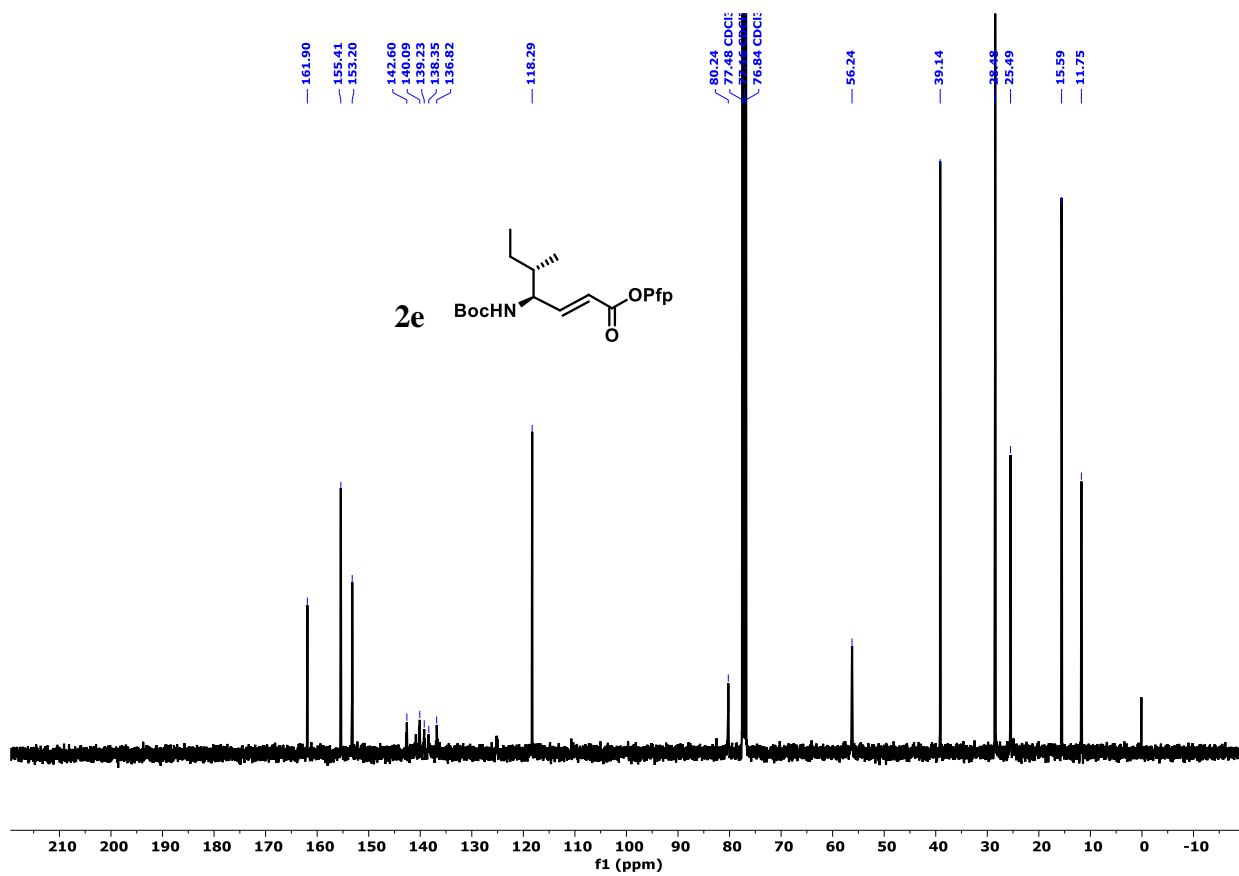

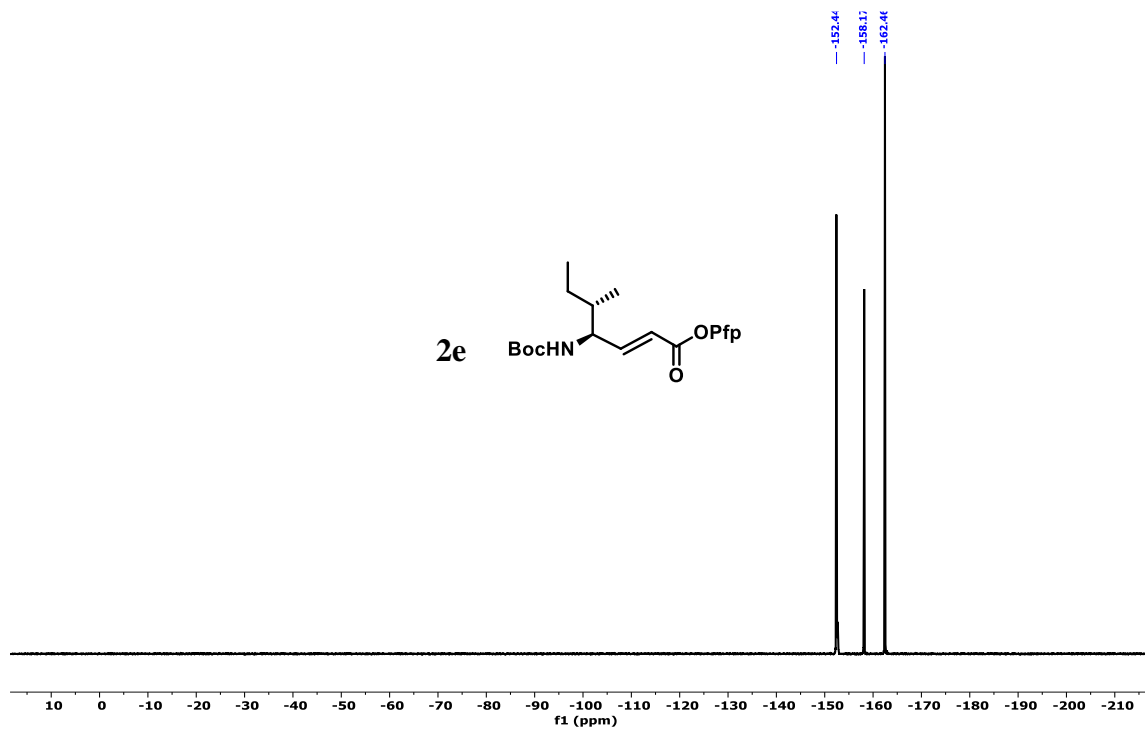

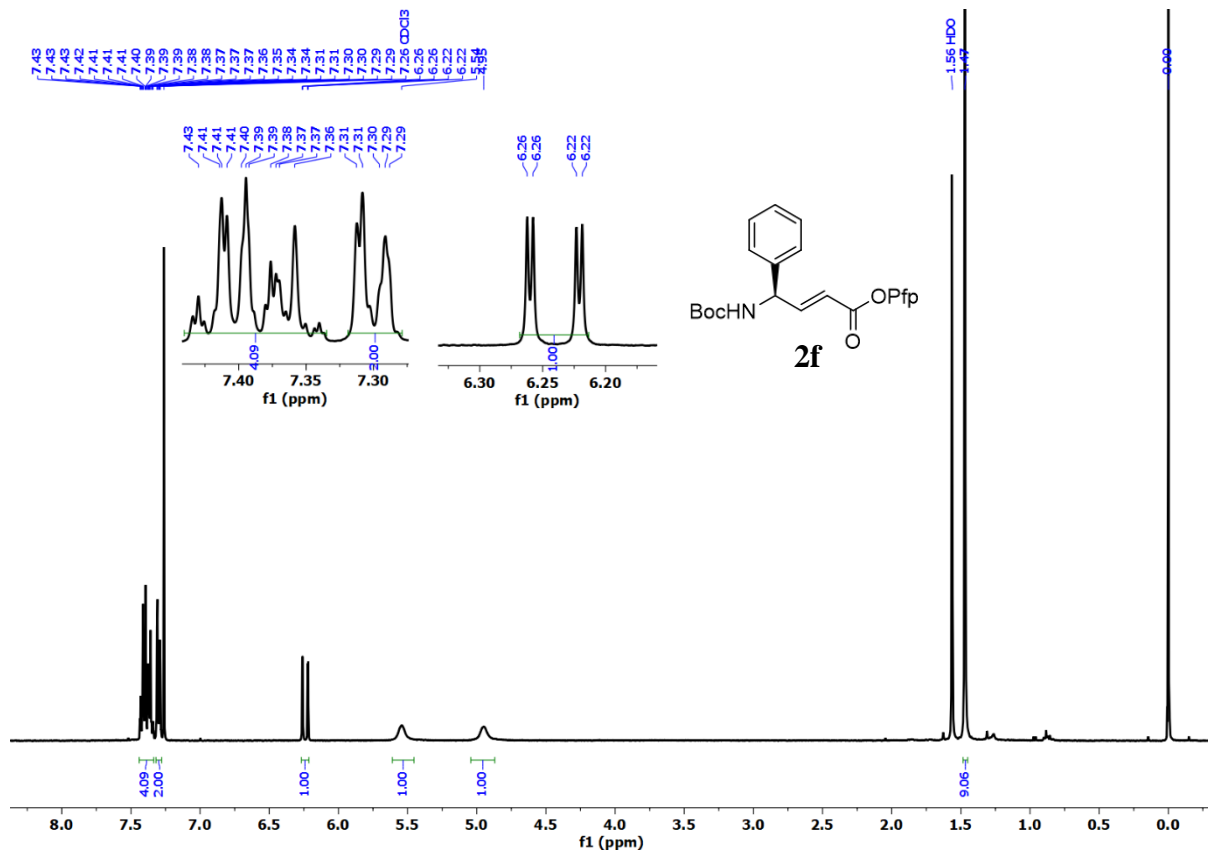

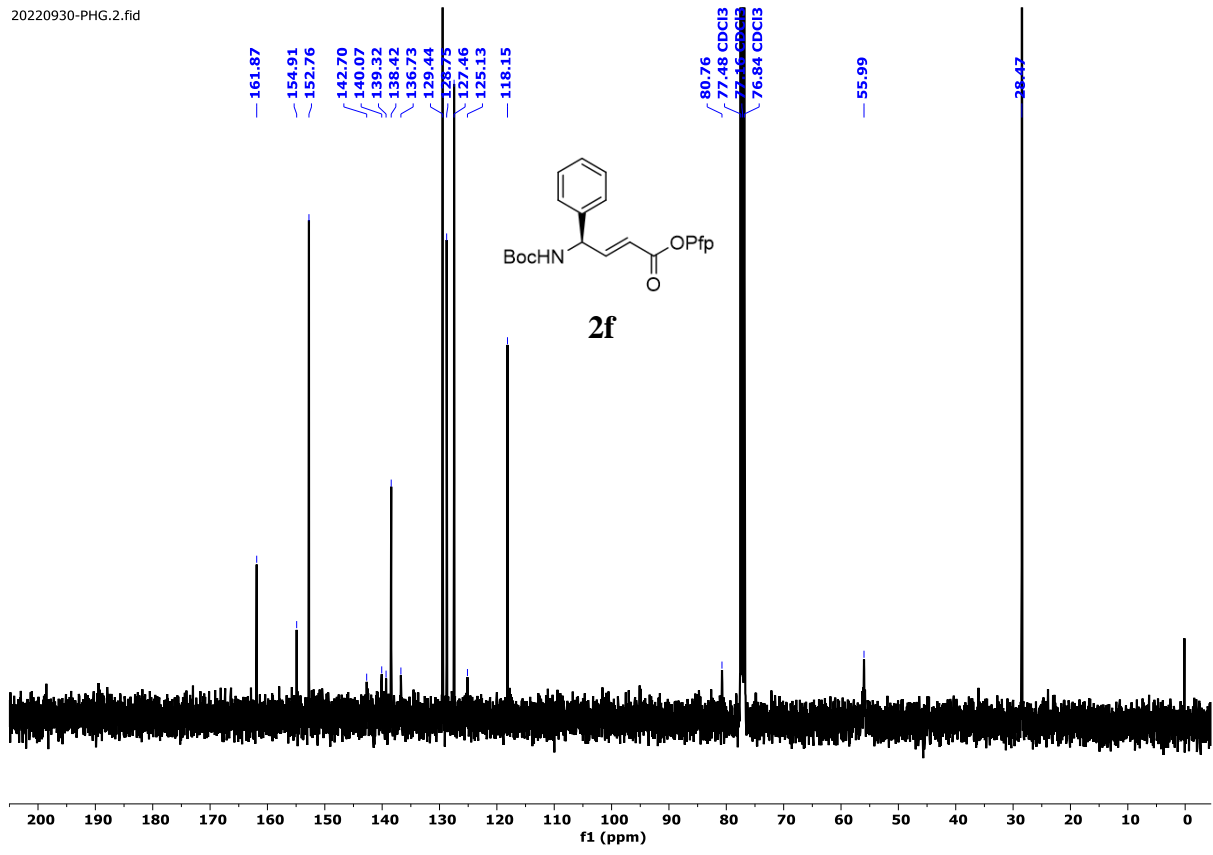

~152.34  
~157.99  
~162.34

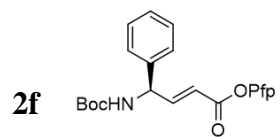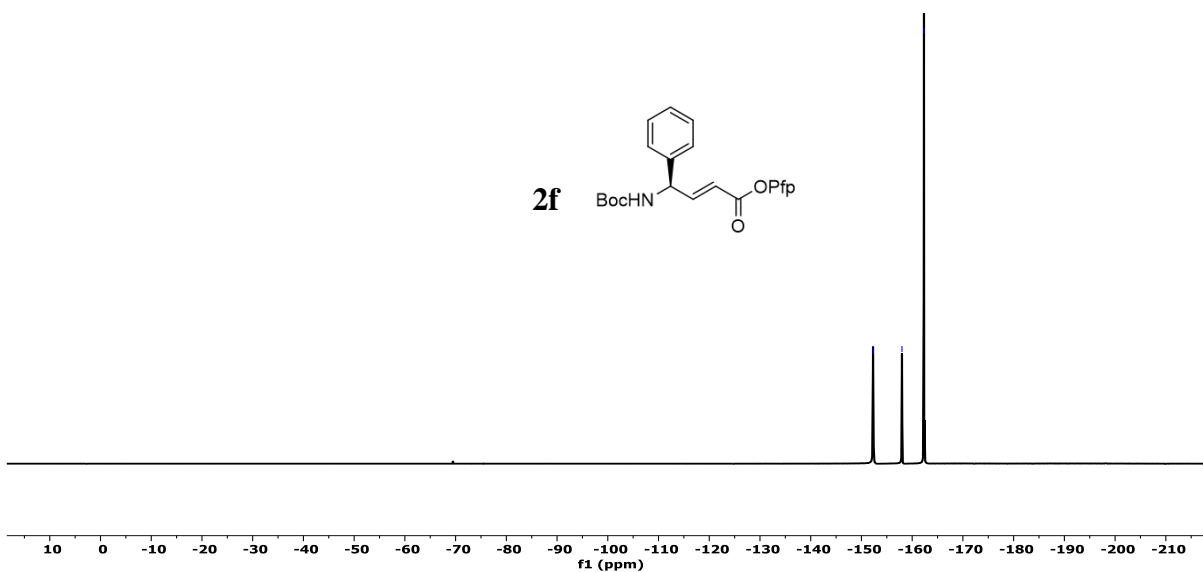

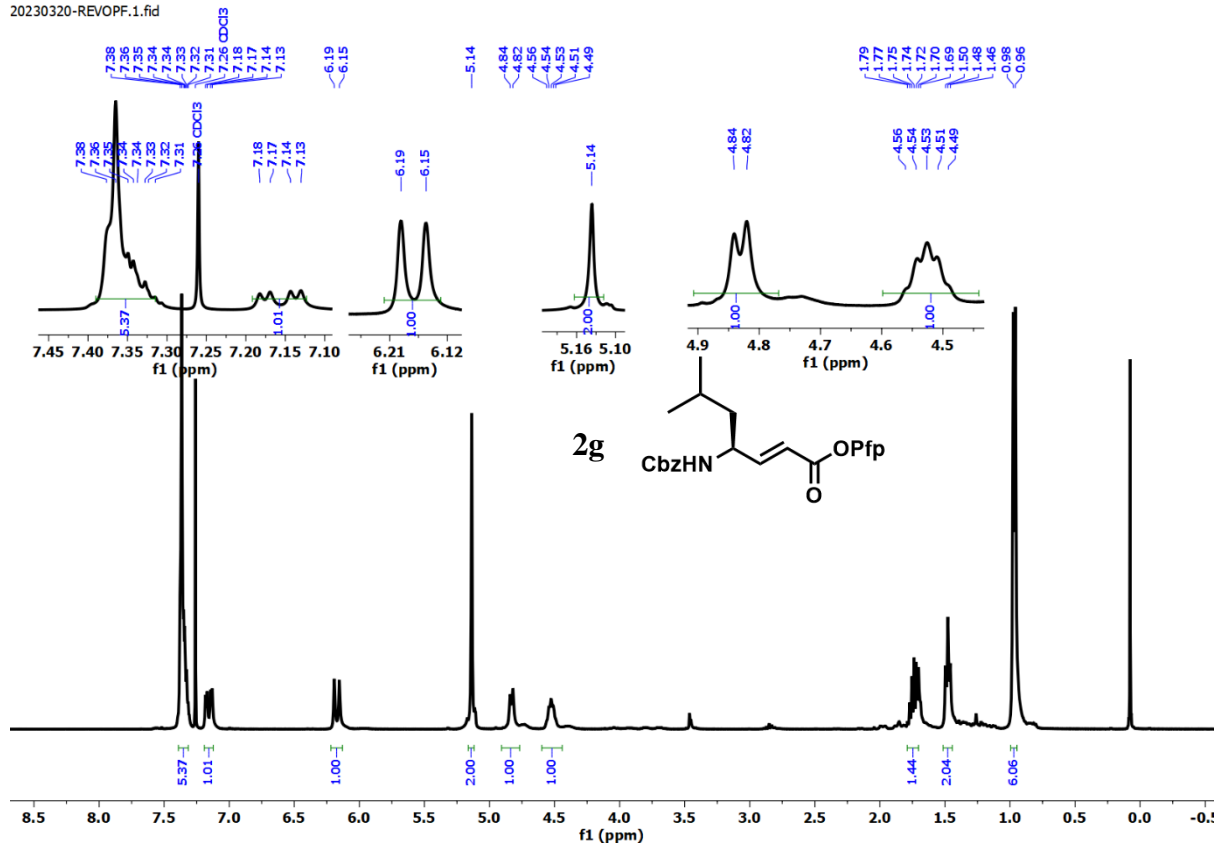

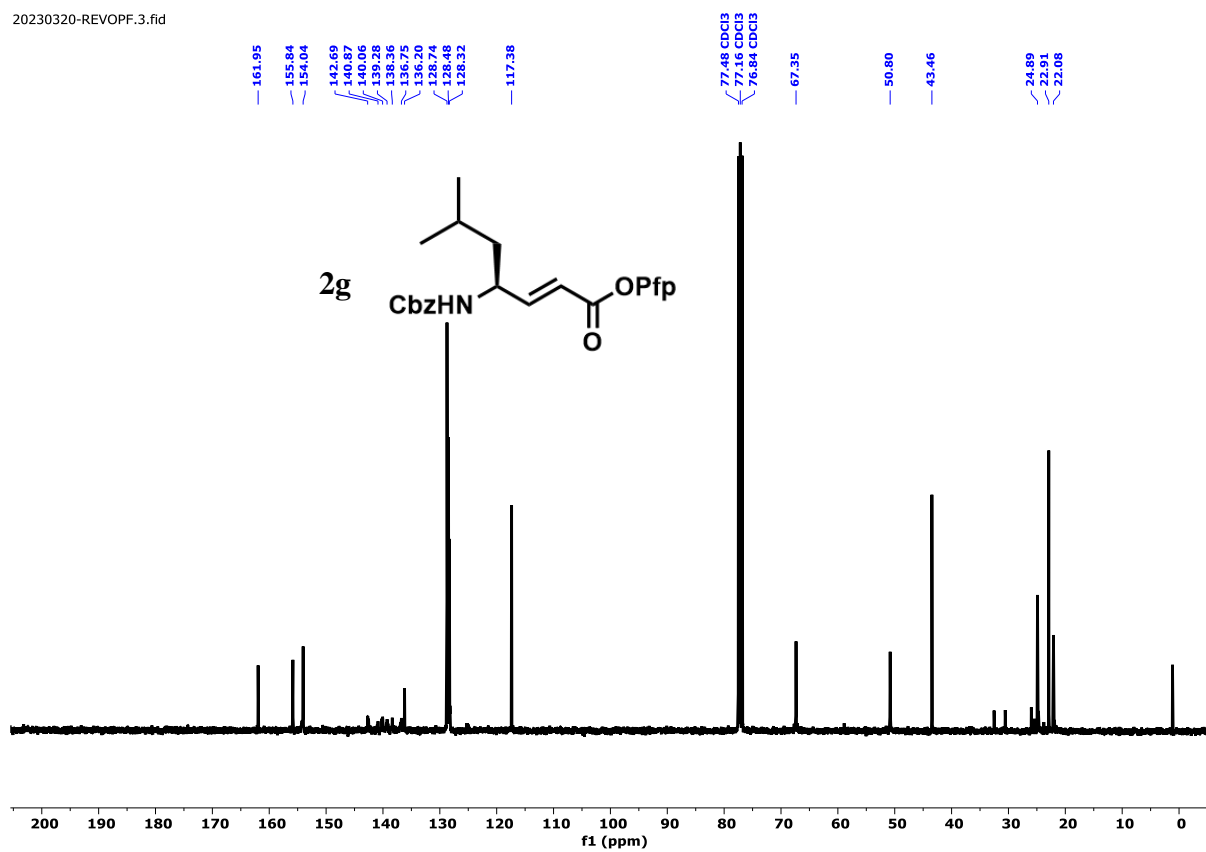



-152.39  
-158.08  
-162.40

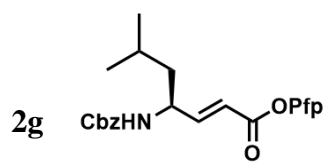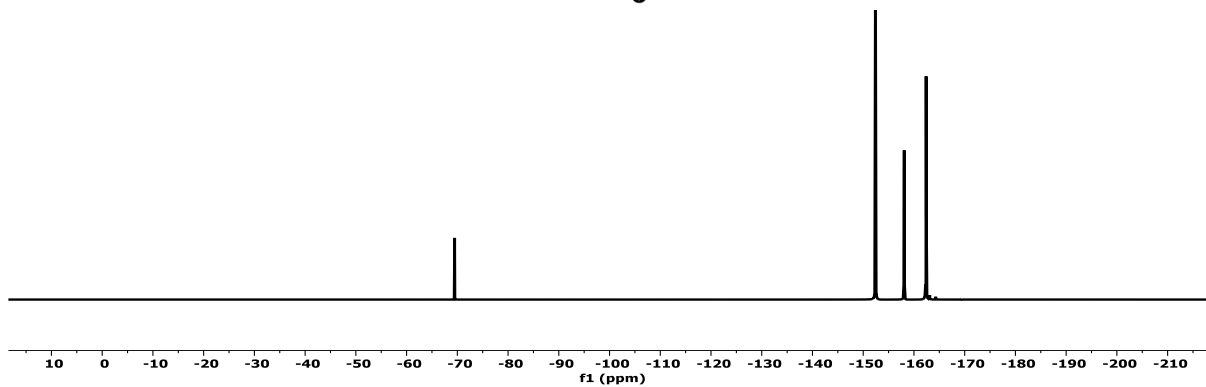

20210708-4PNP.1.fid

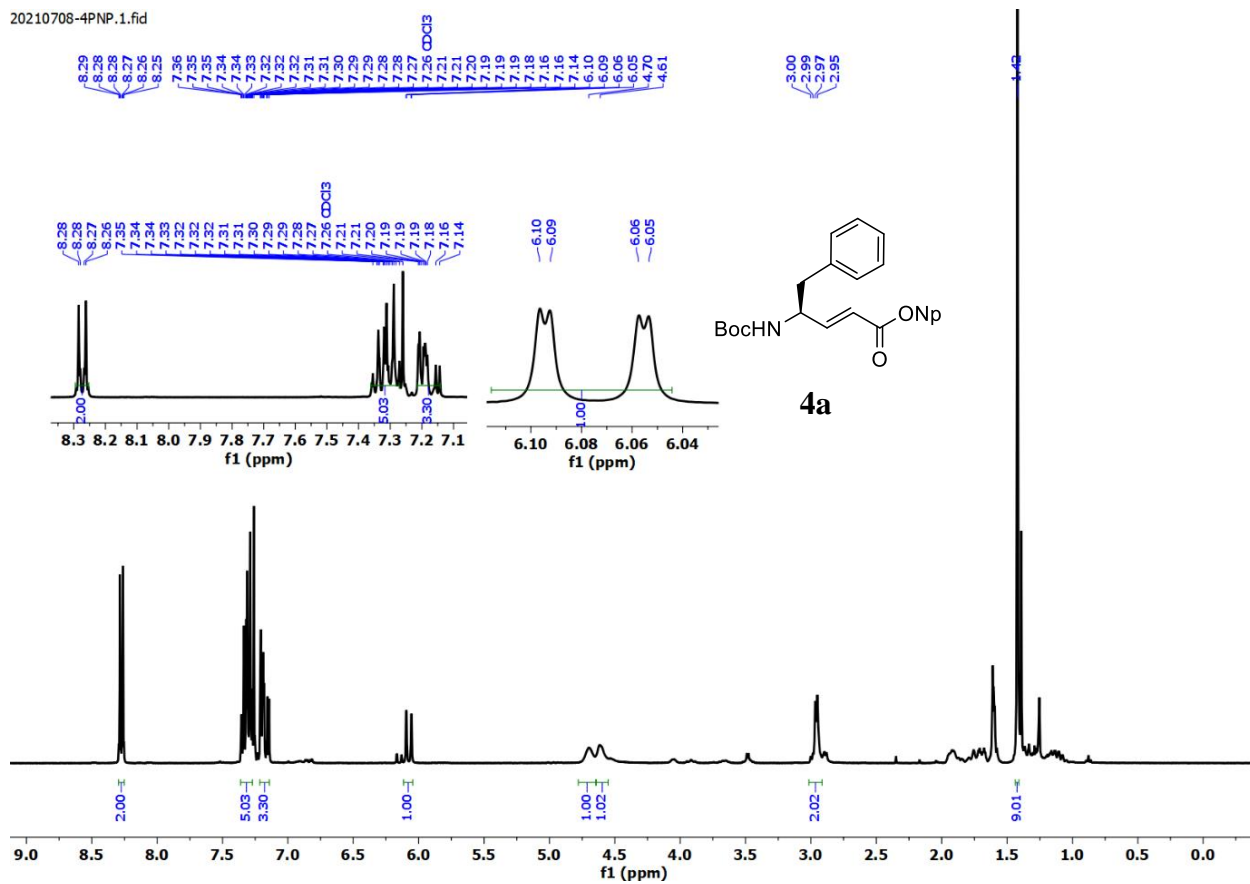

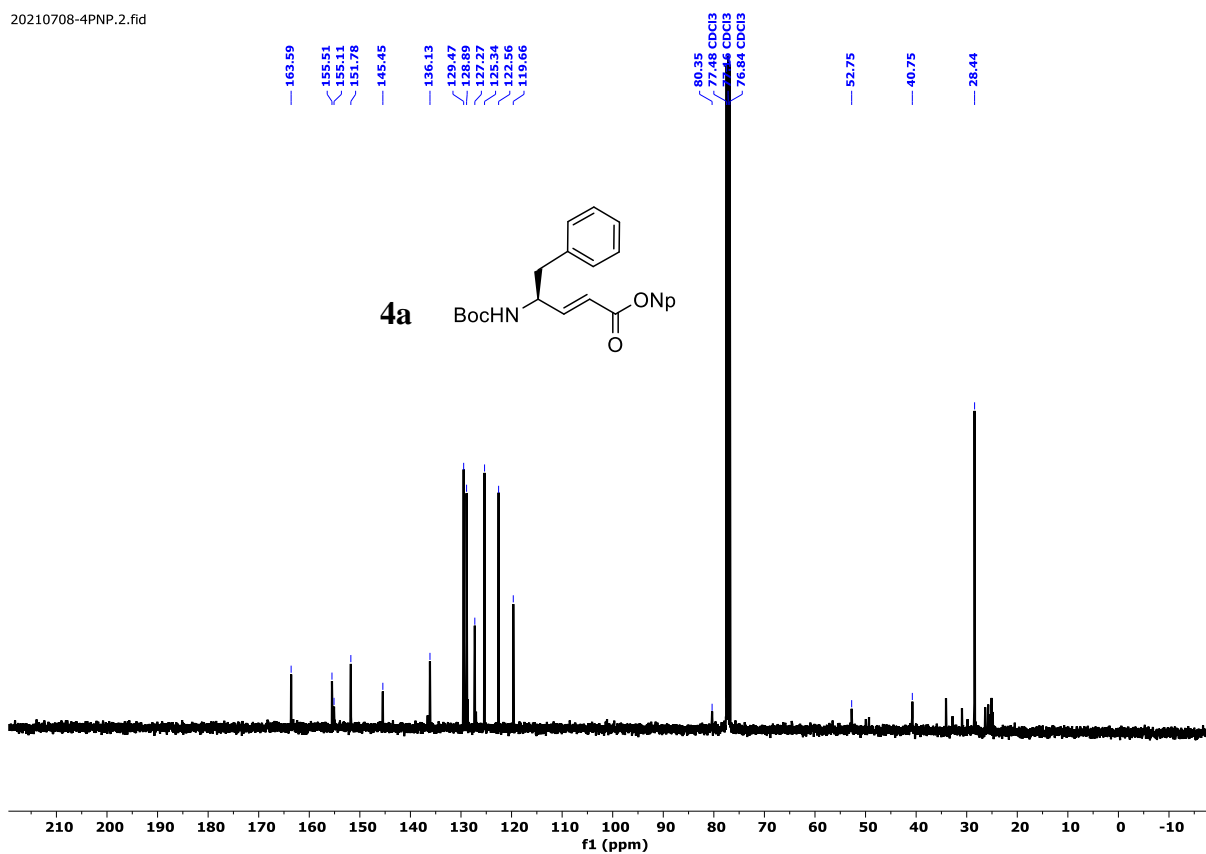

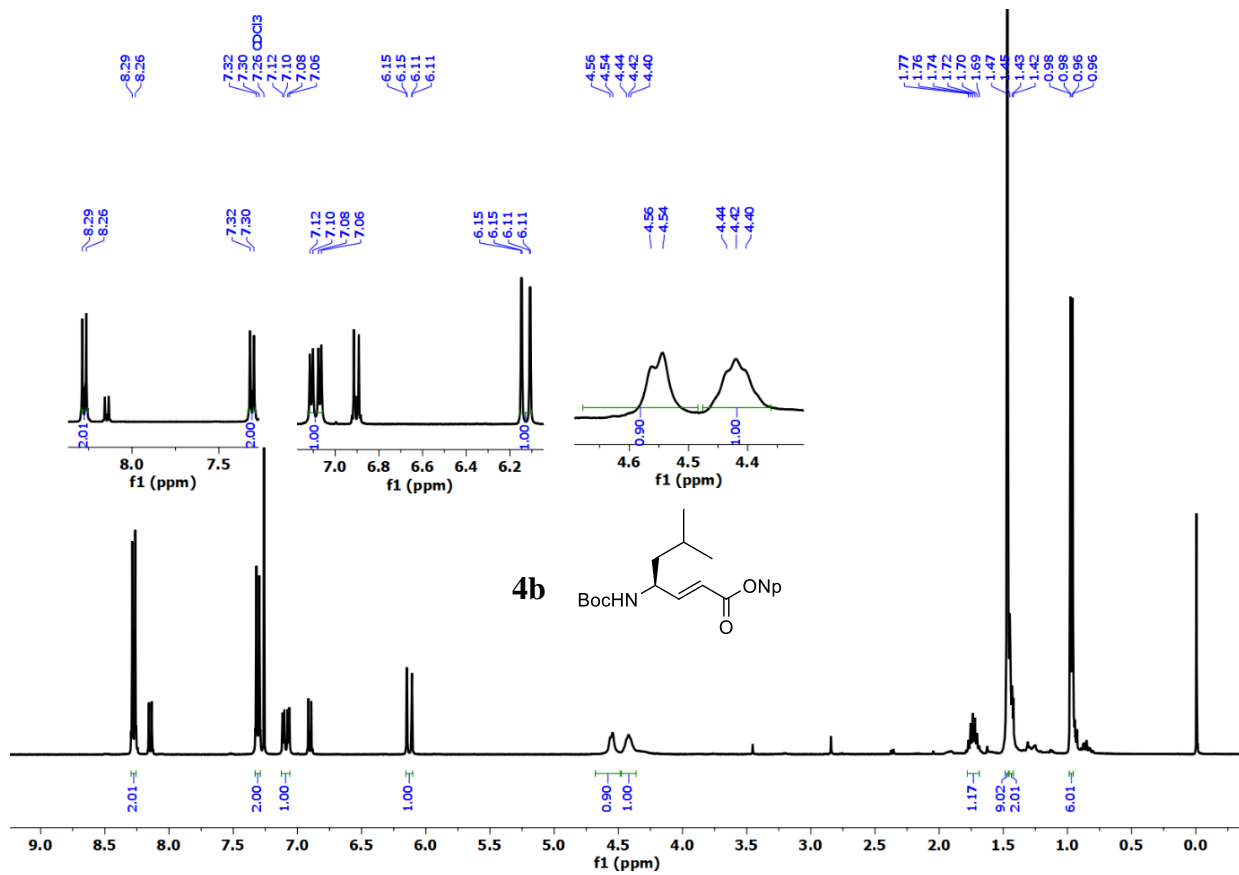

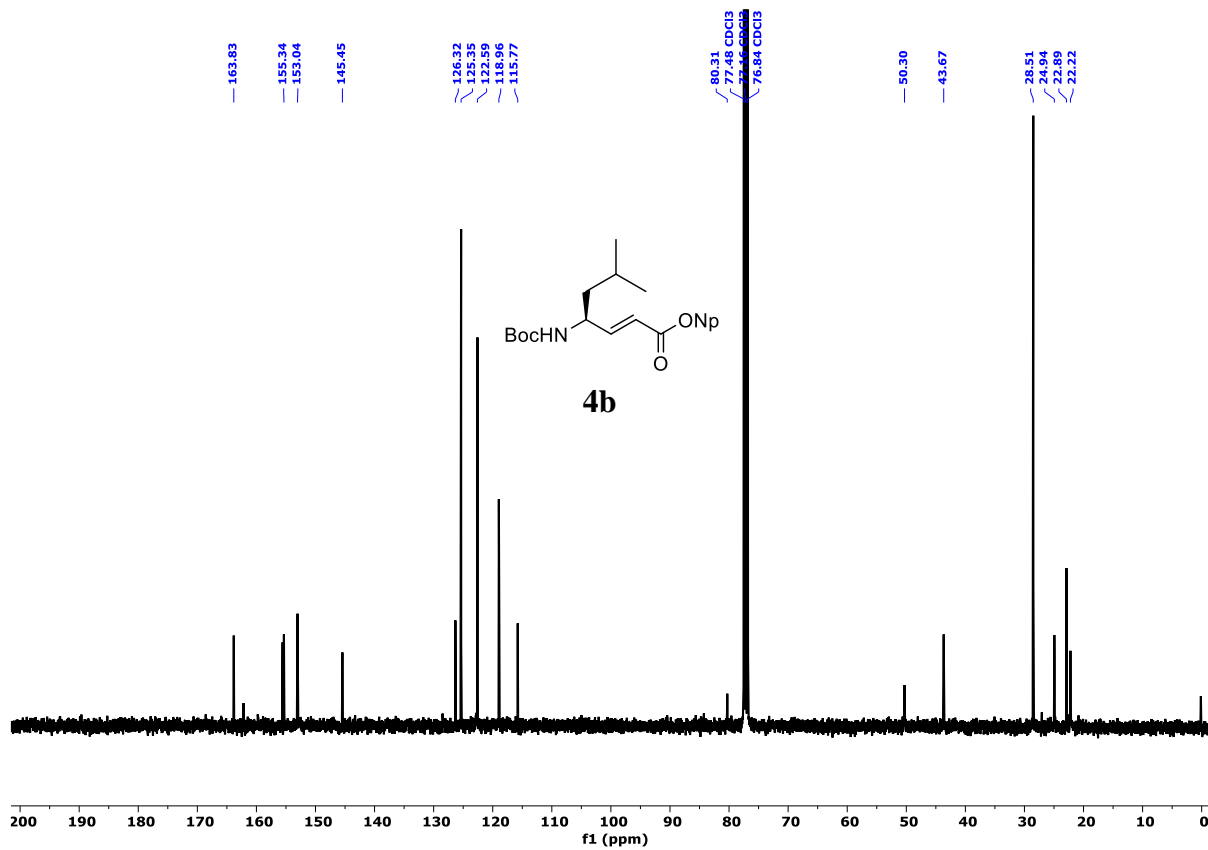

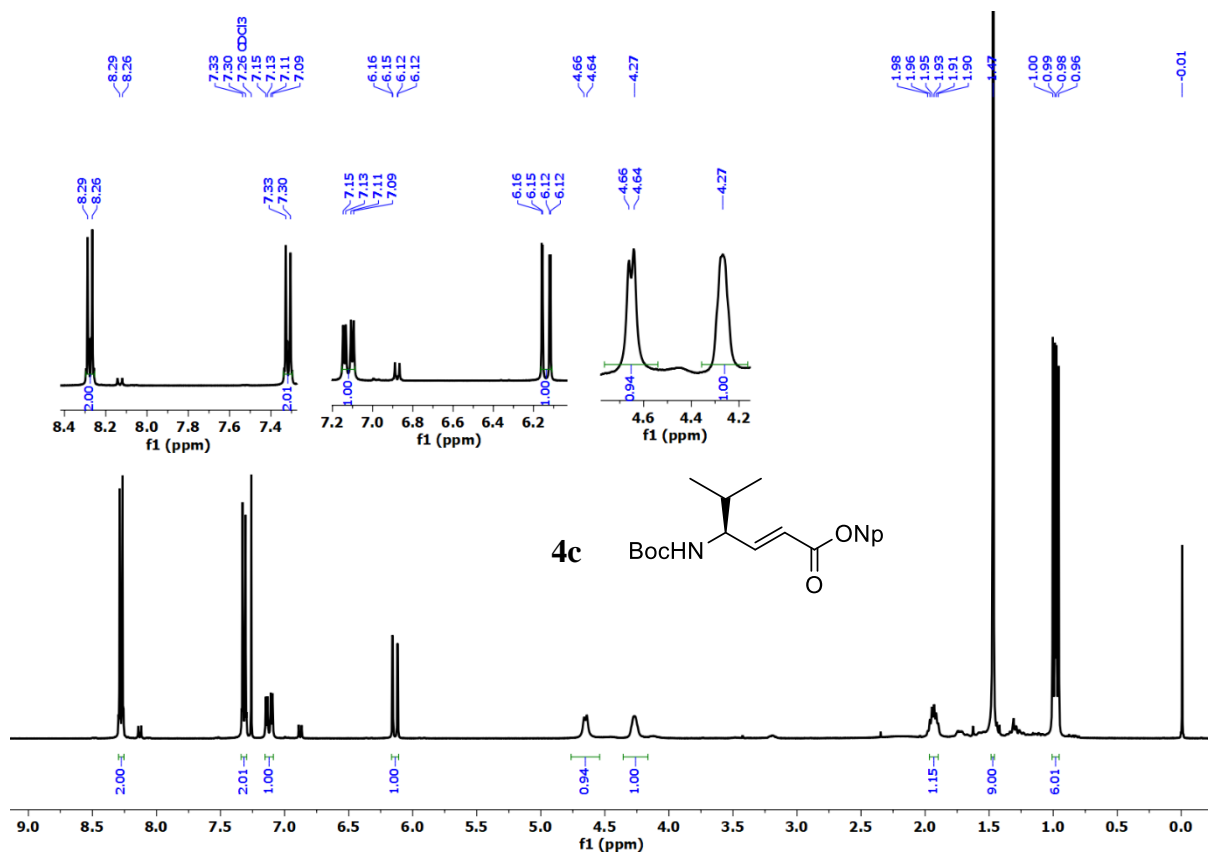

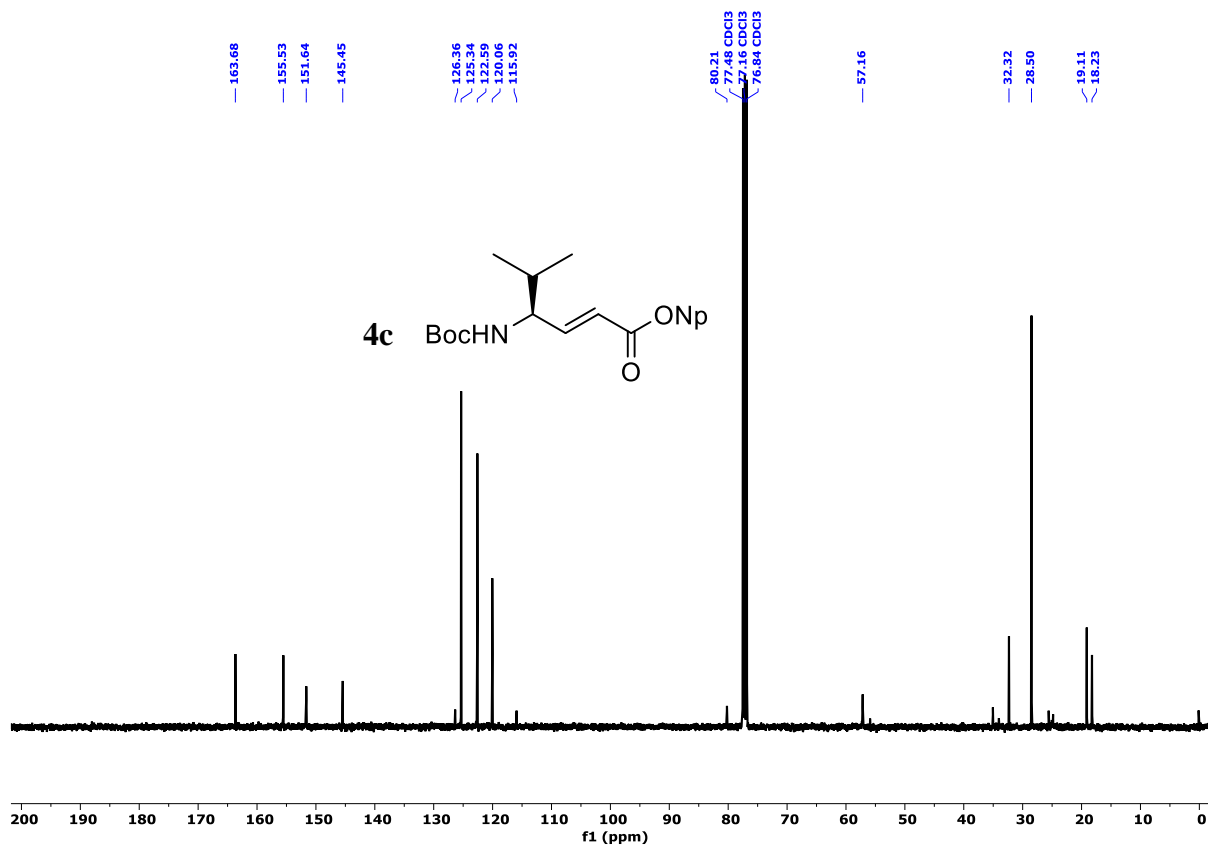

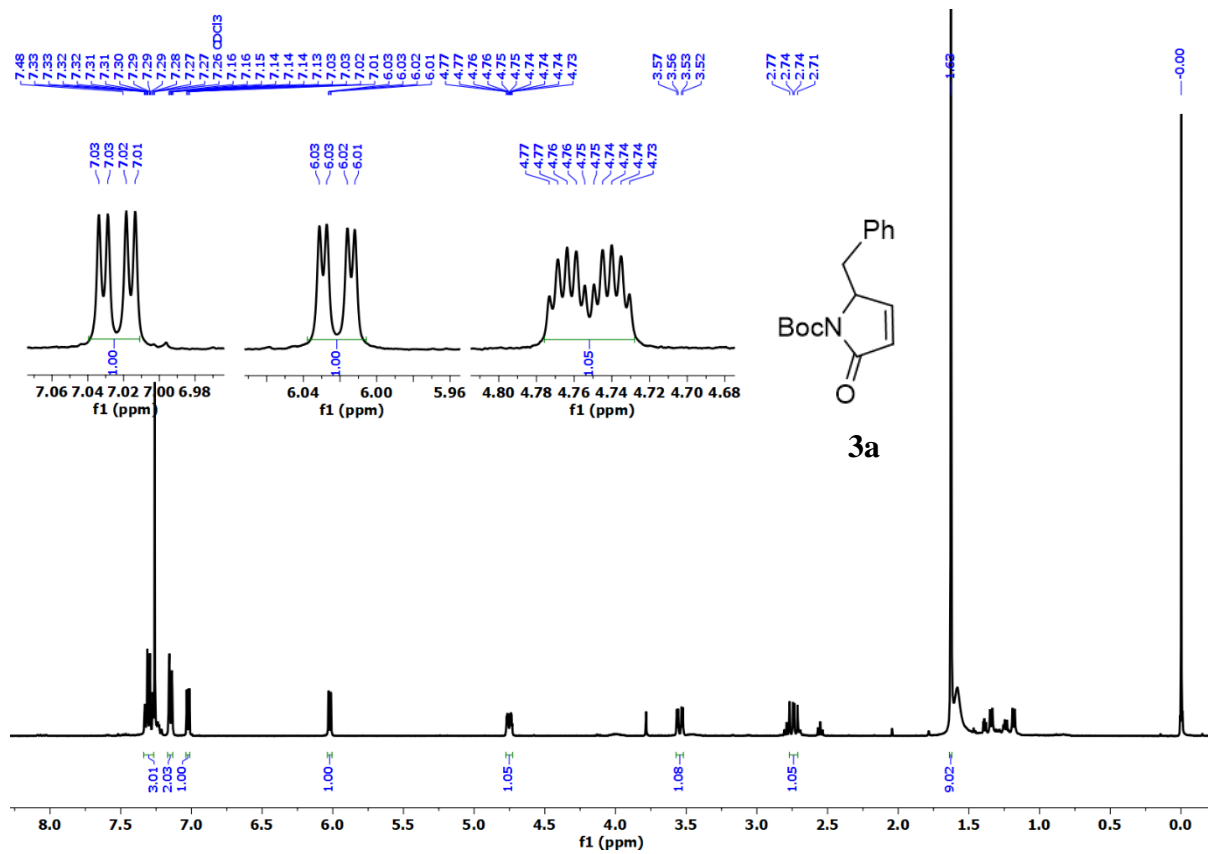



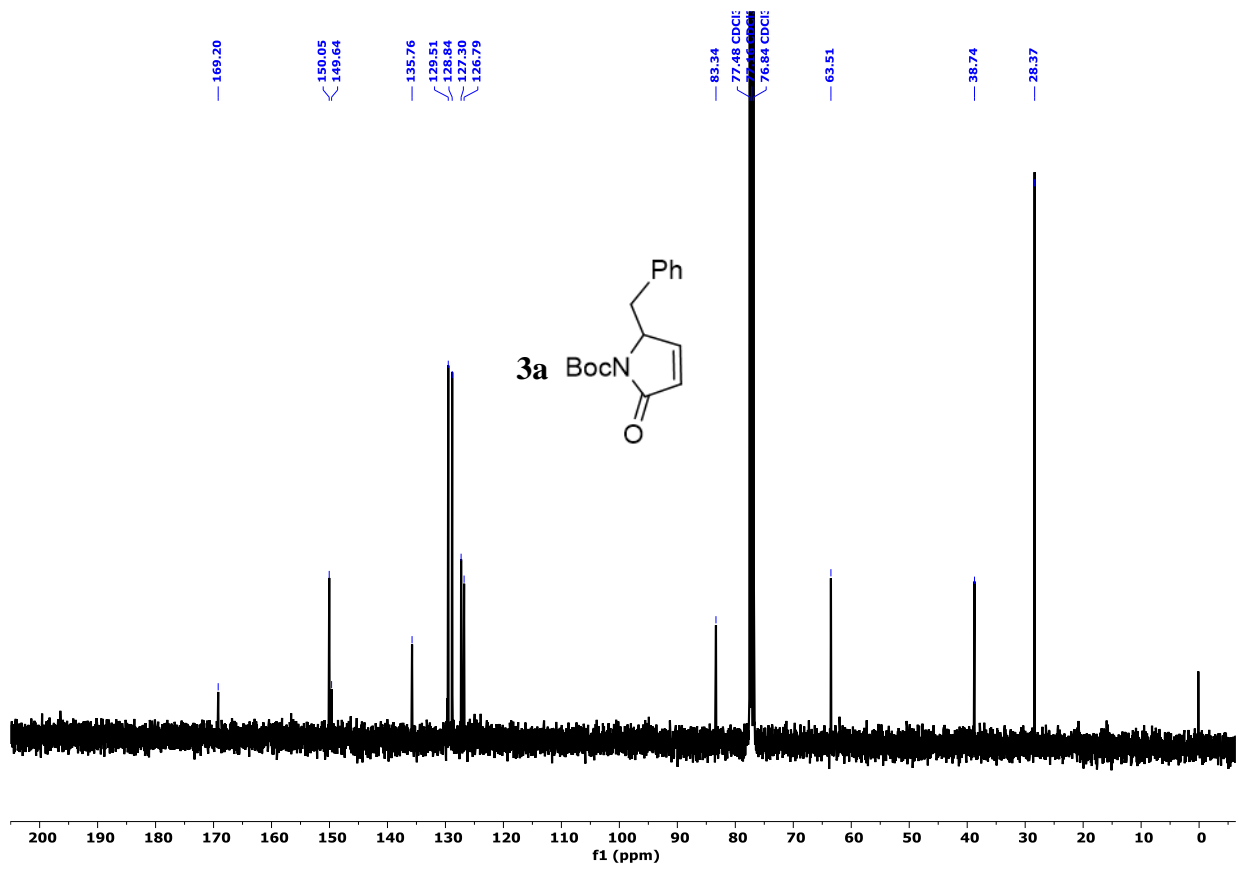

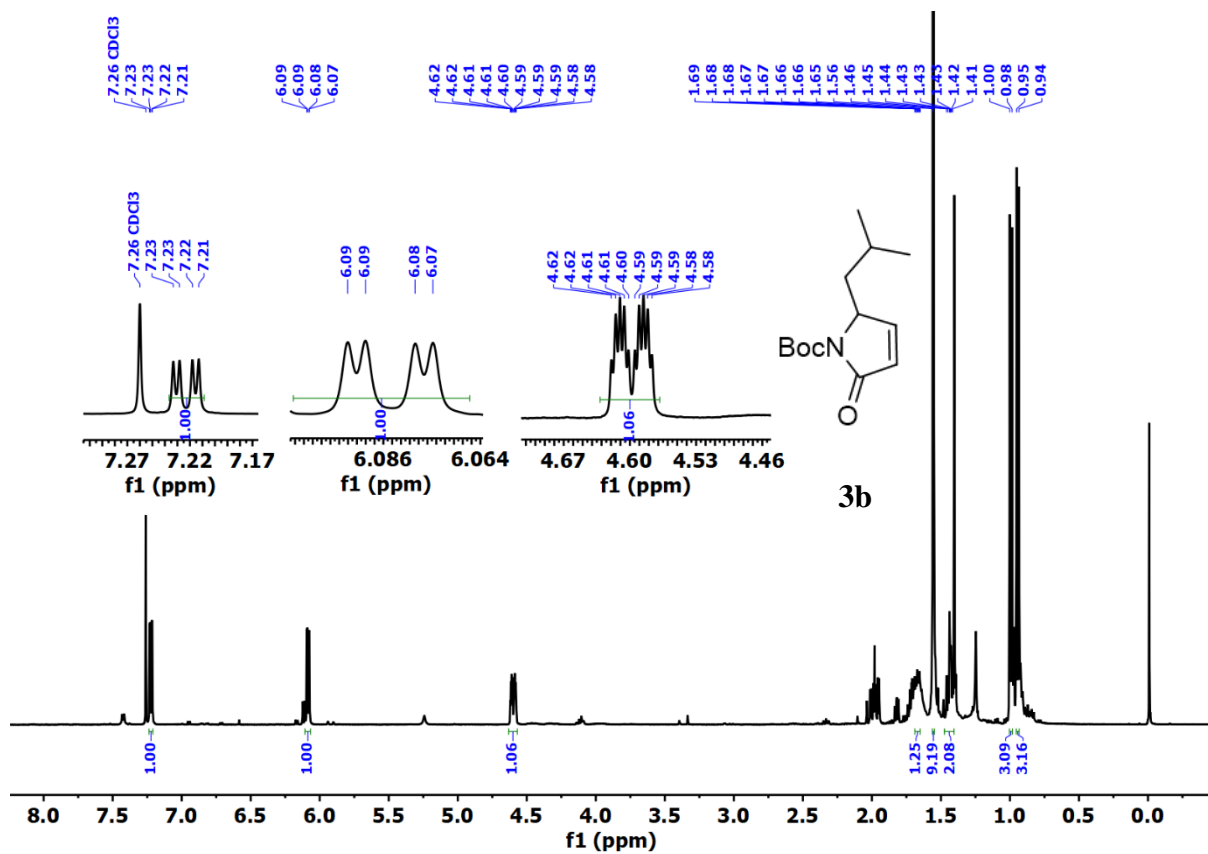

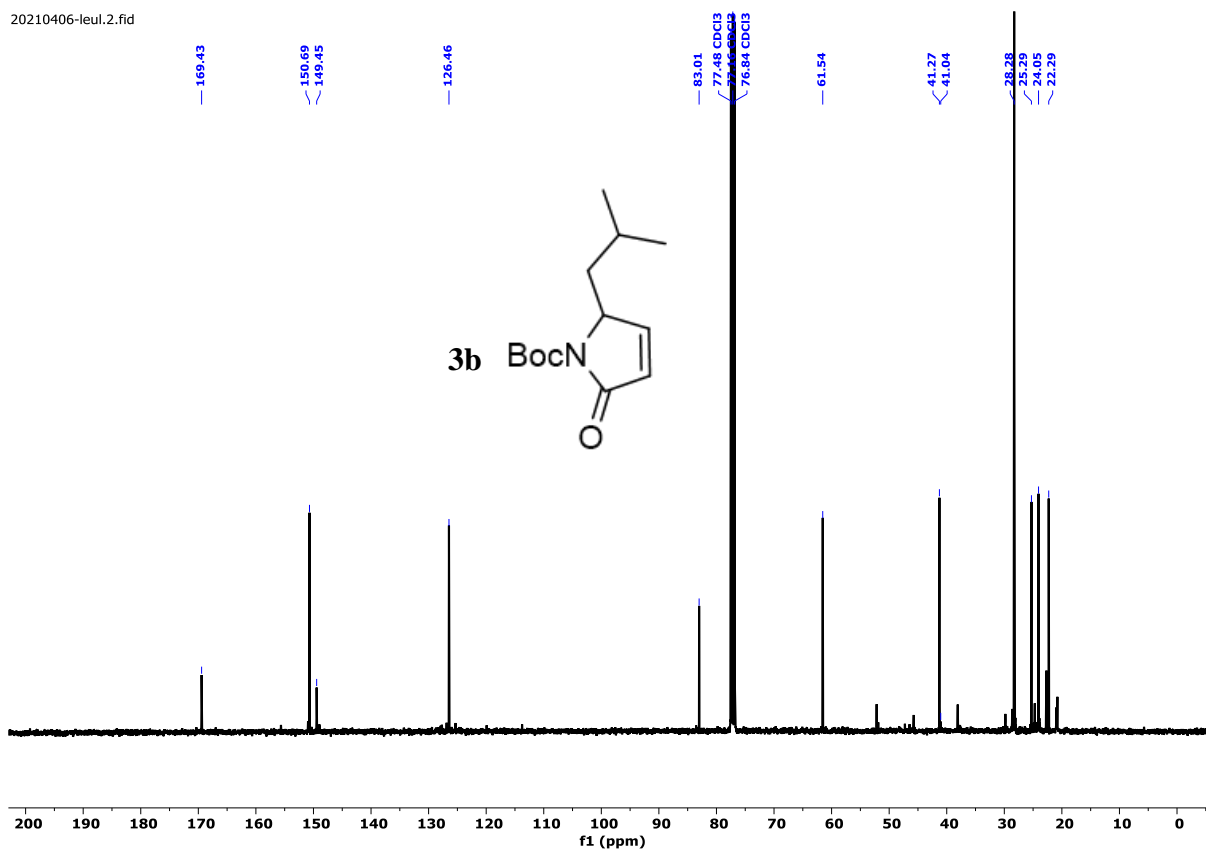

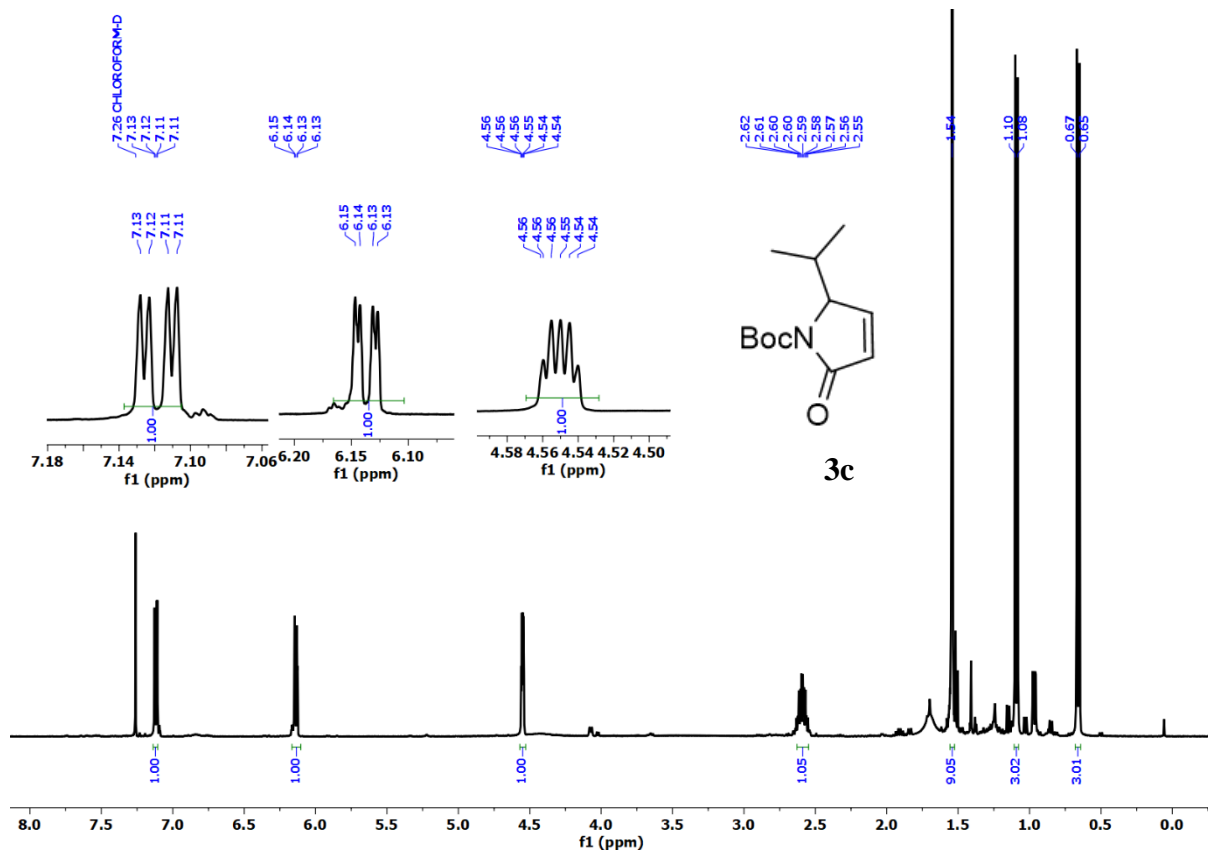

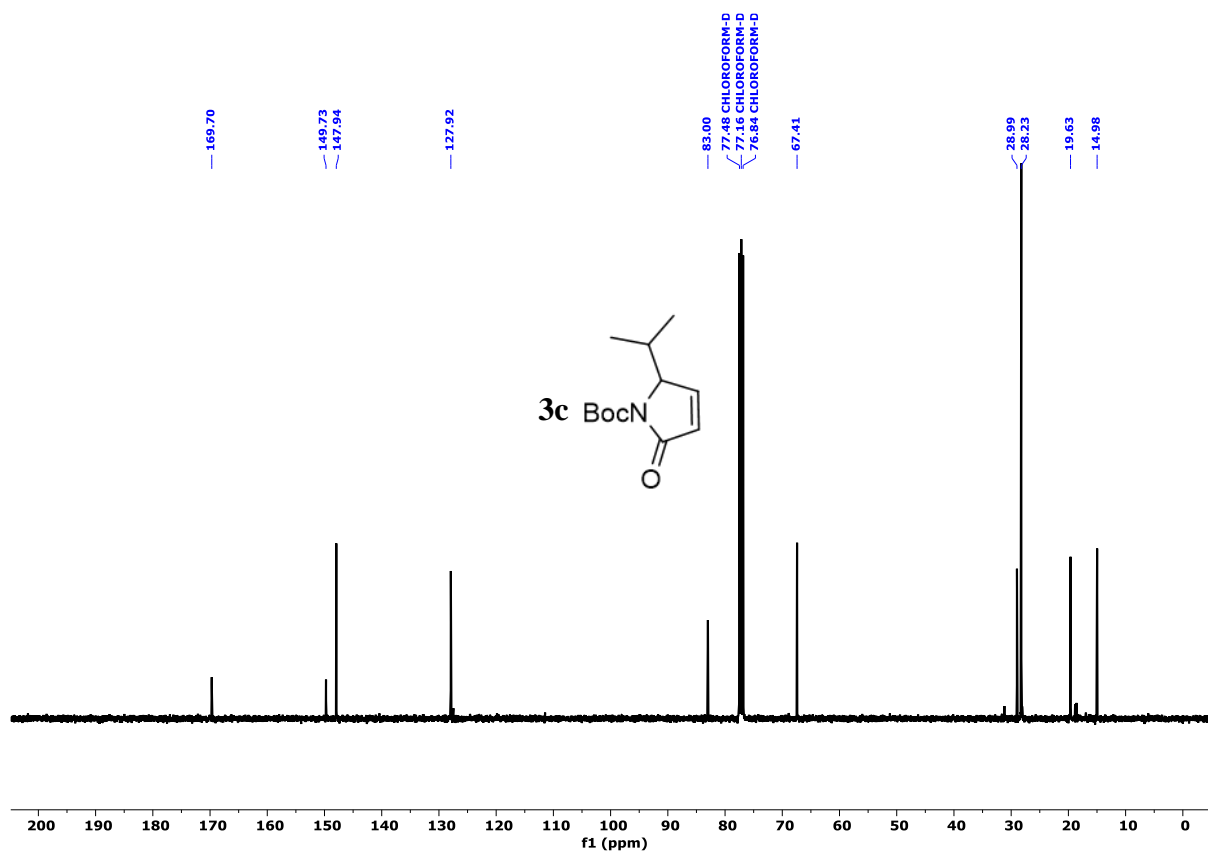

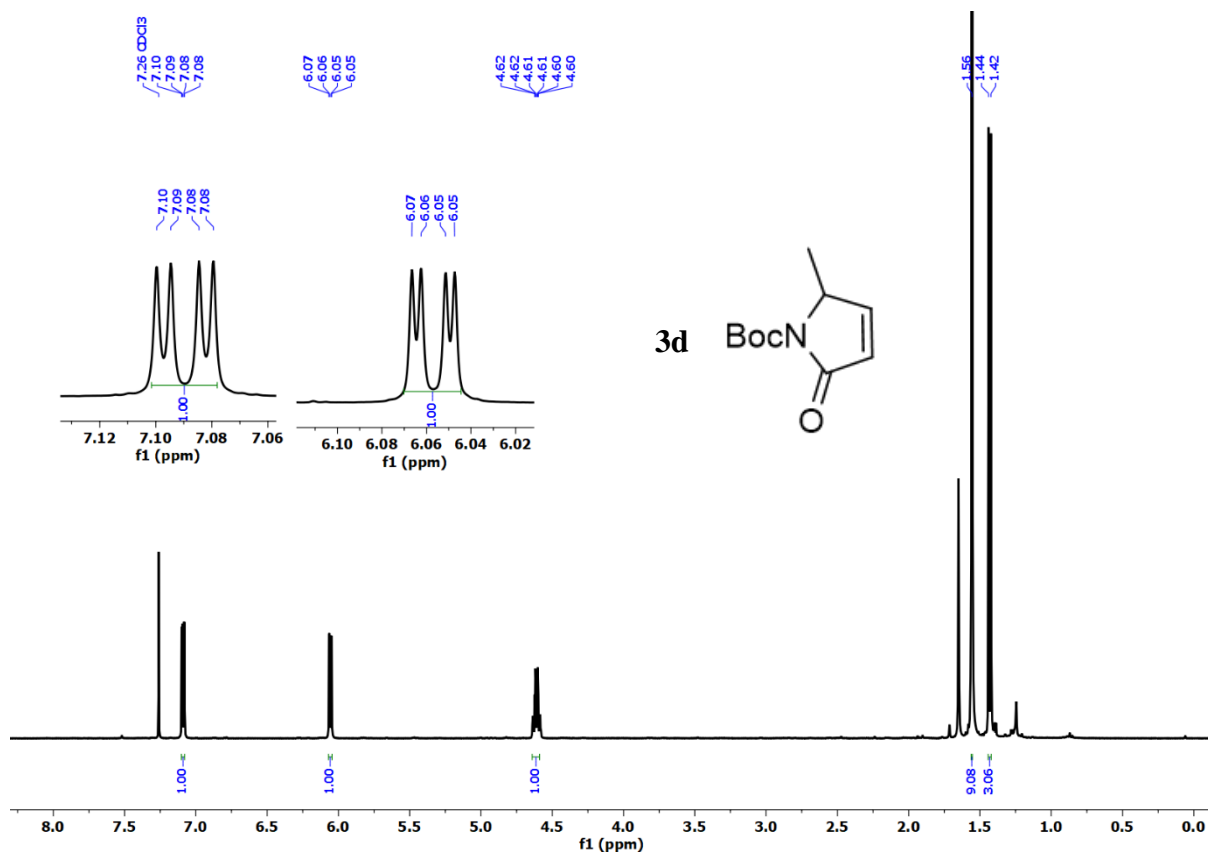

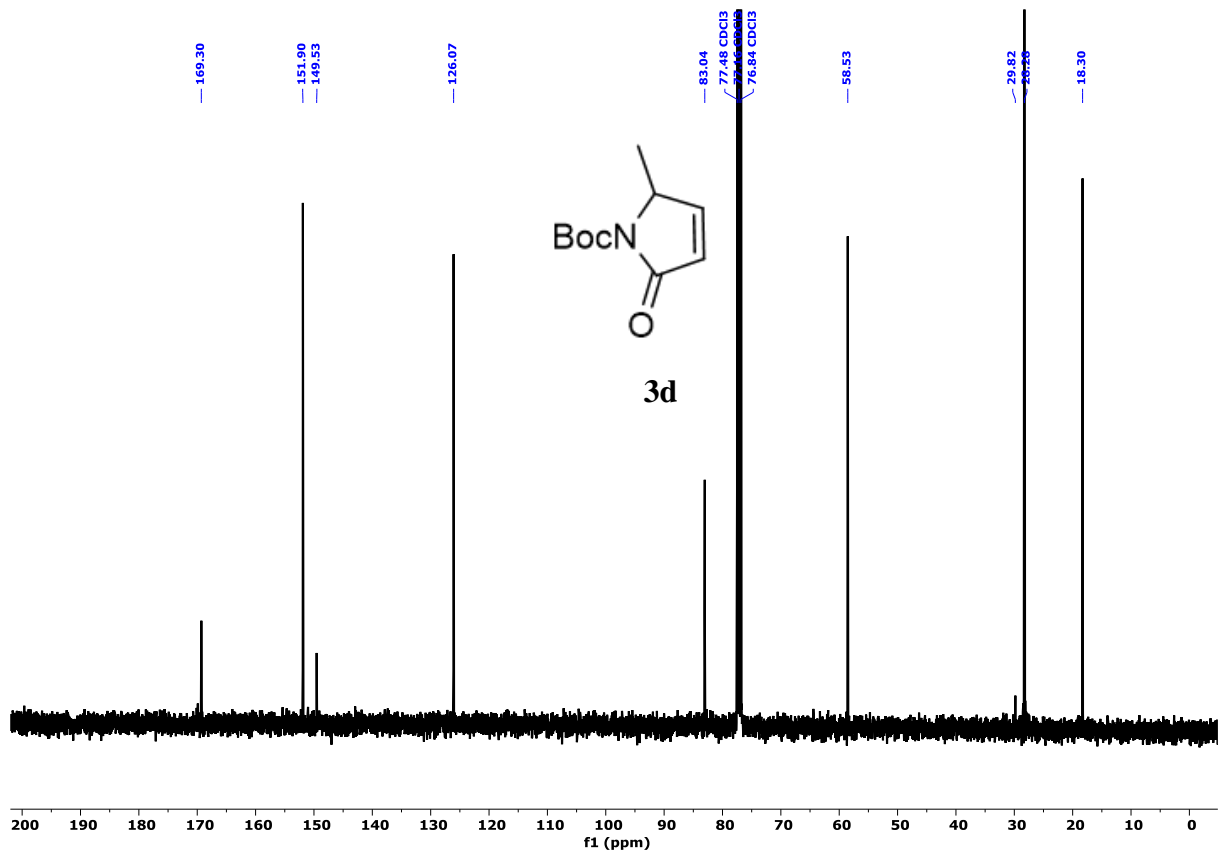

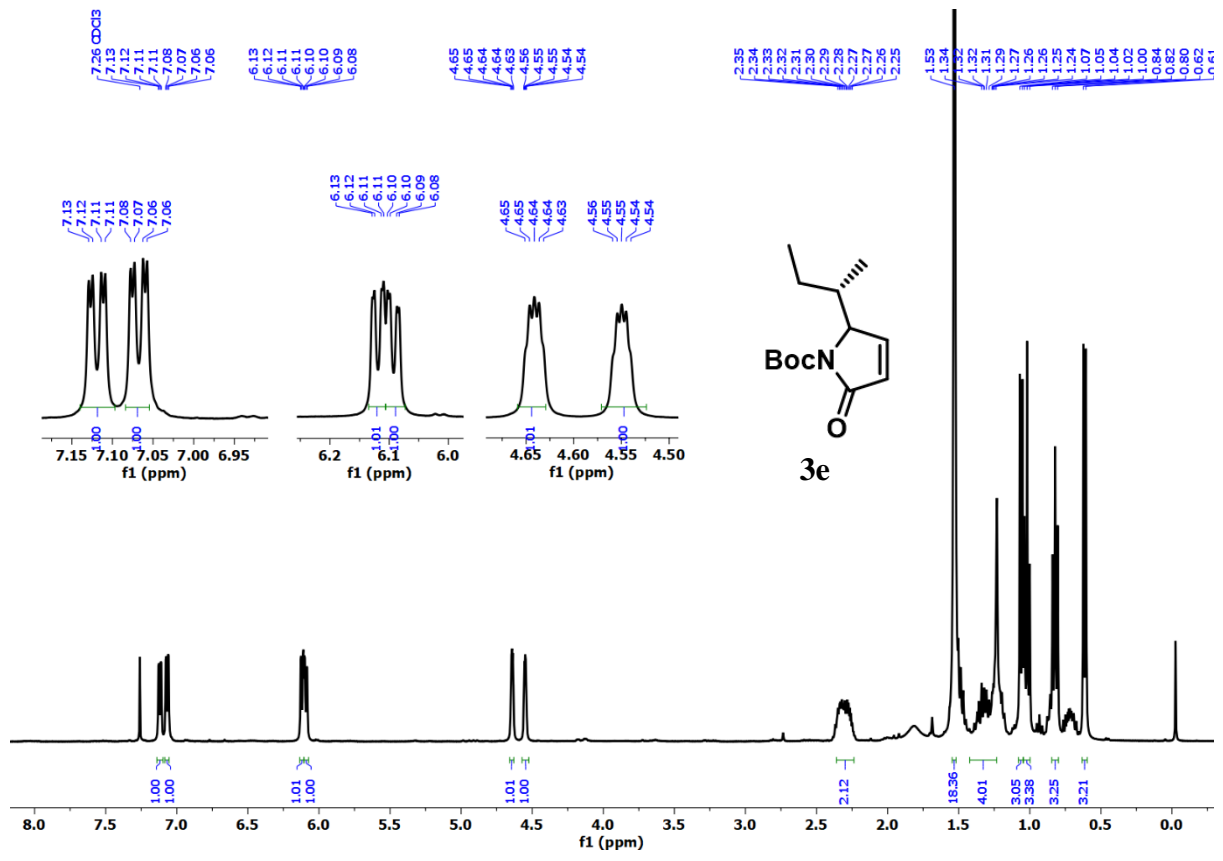



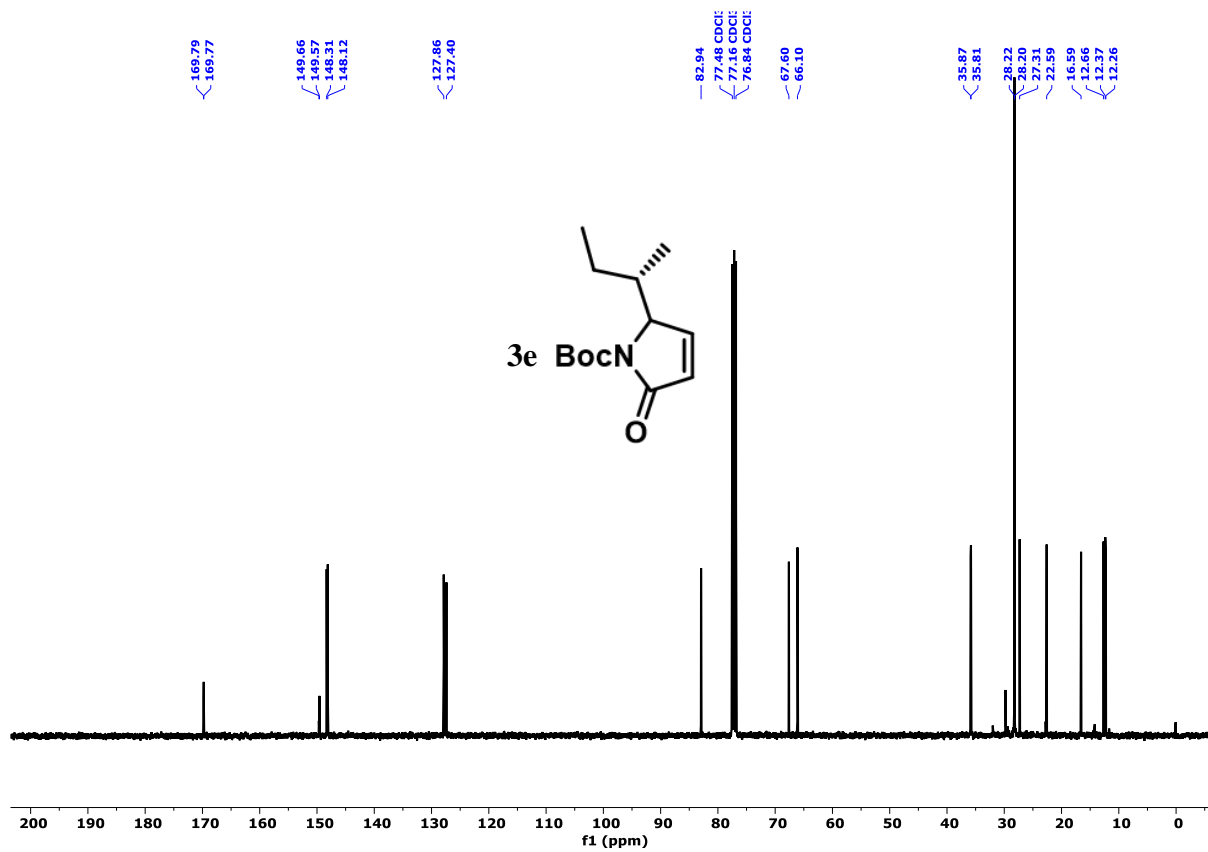

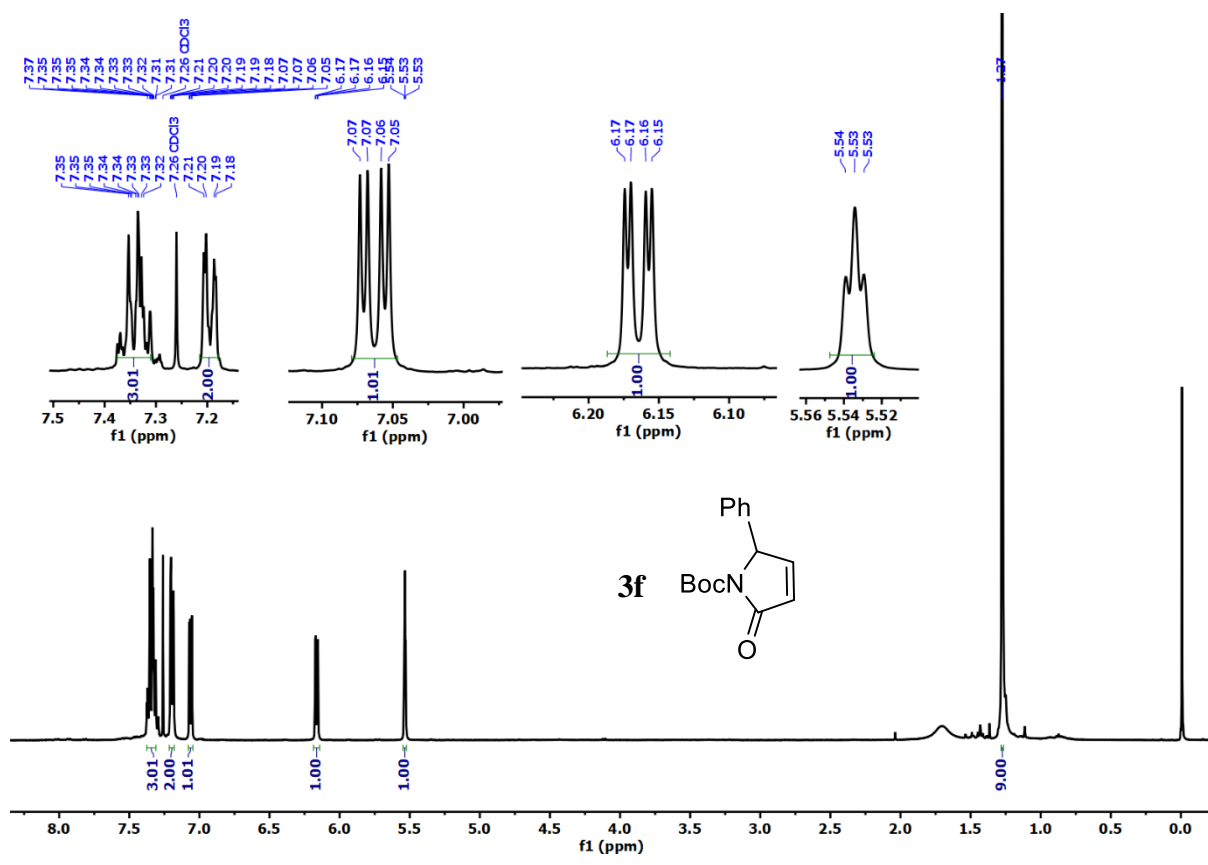

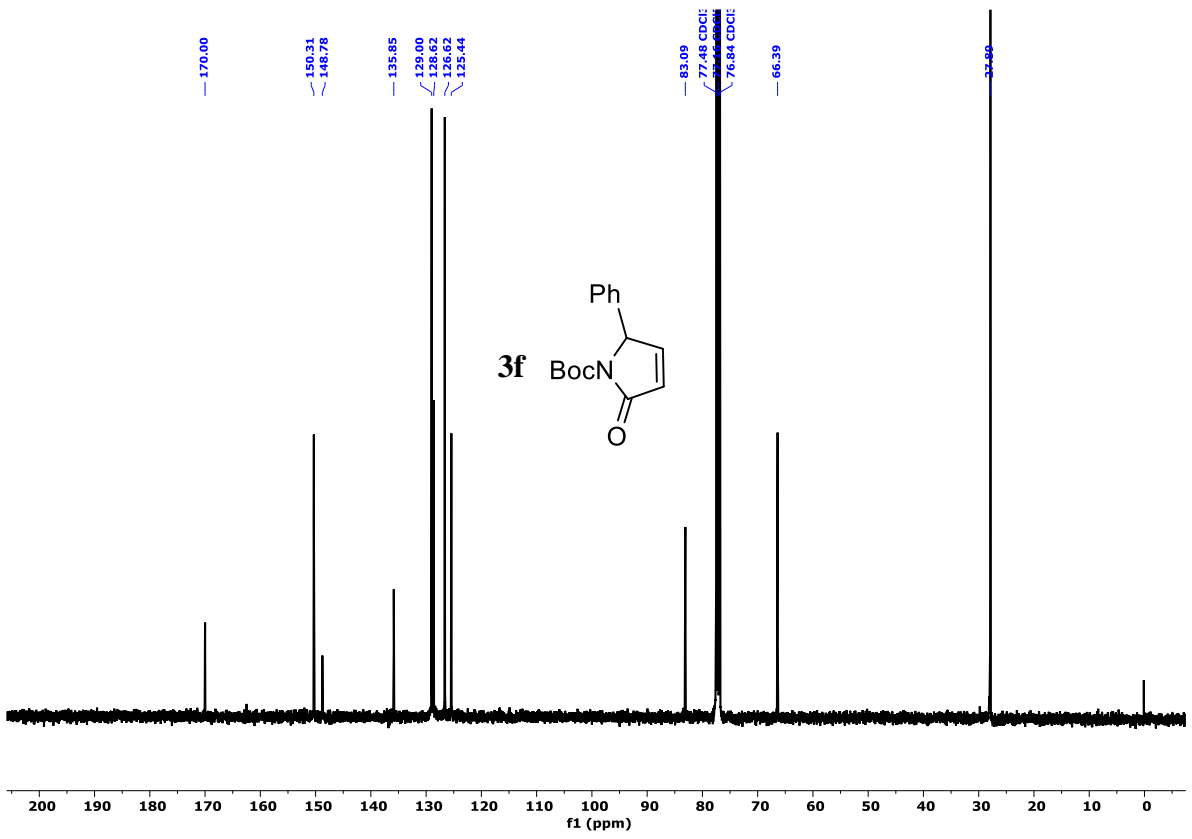

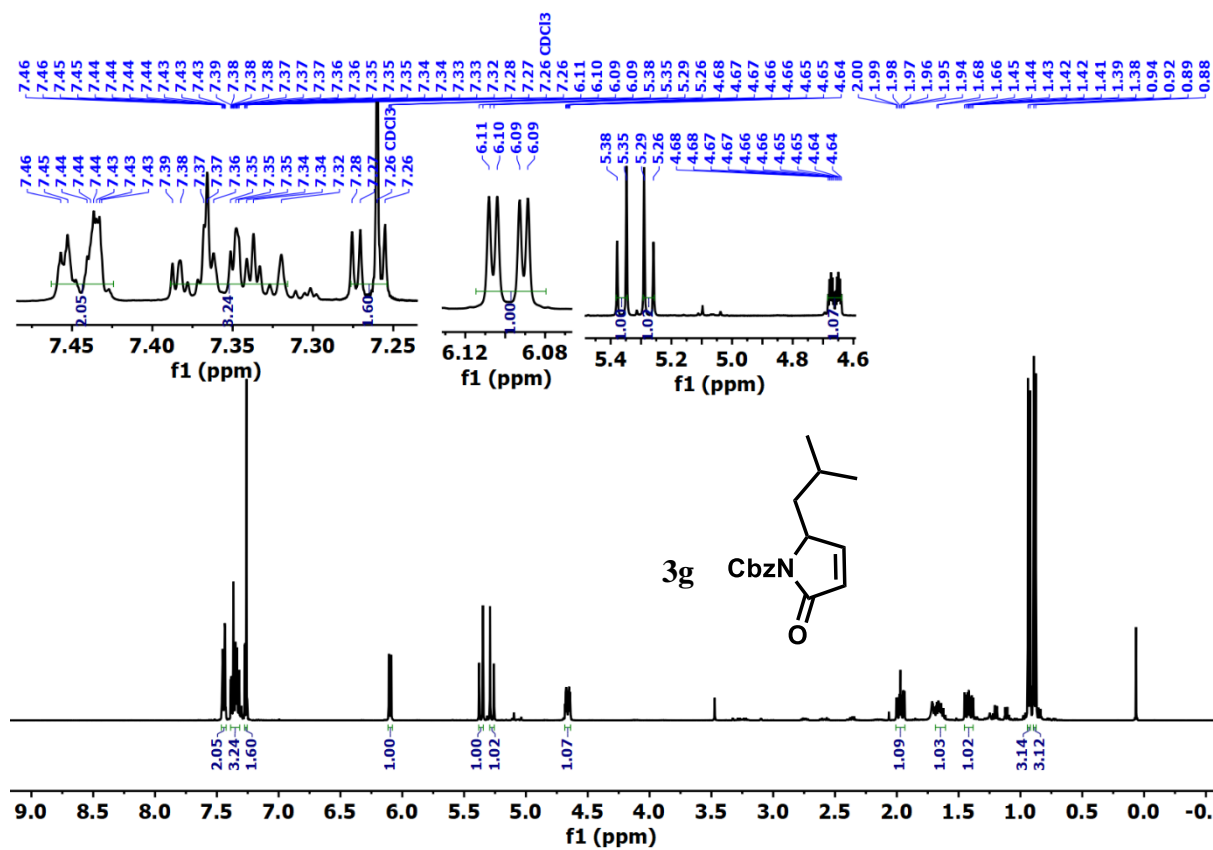

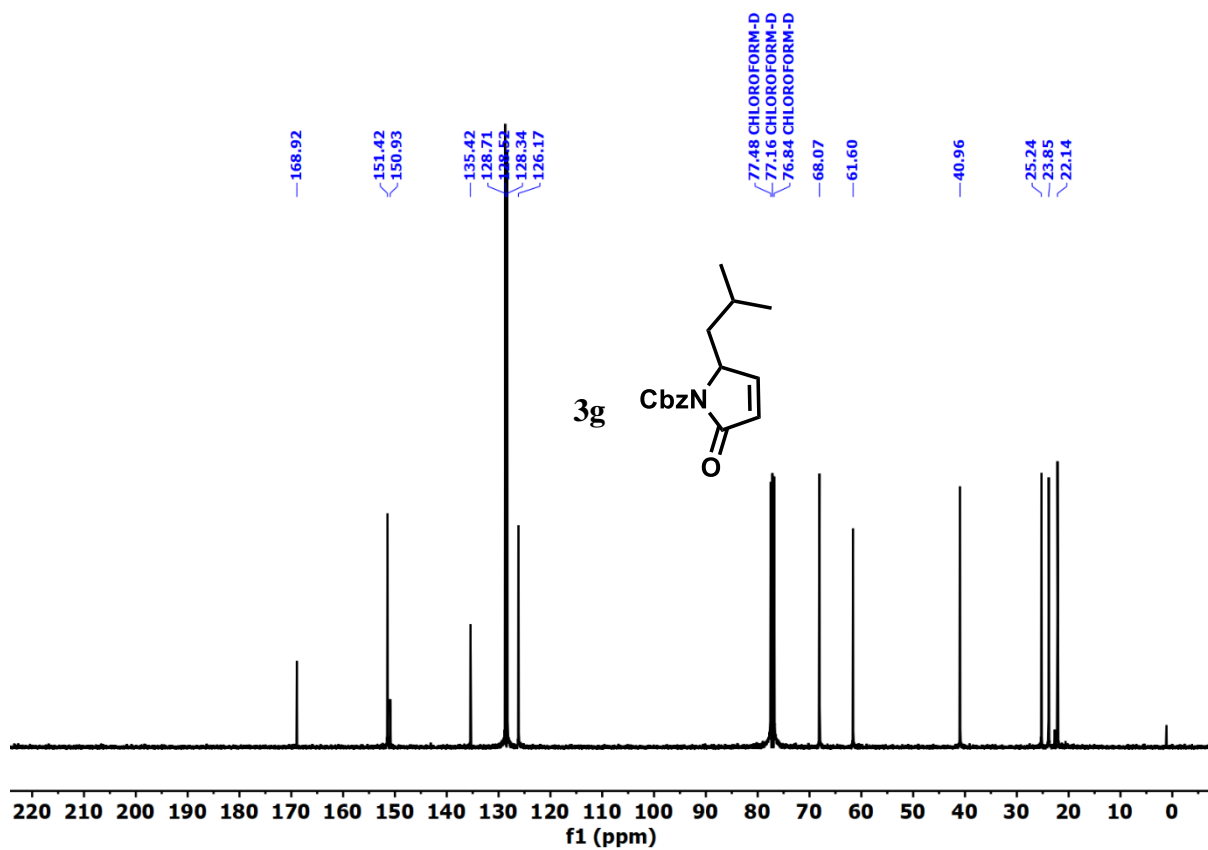

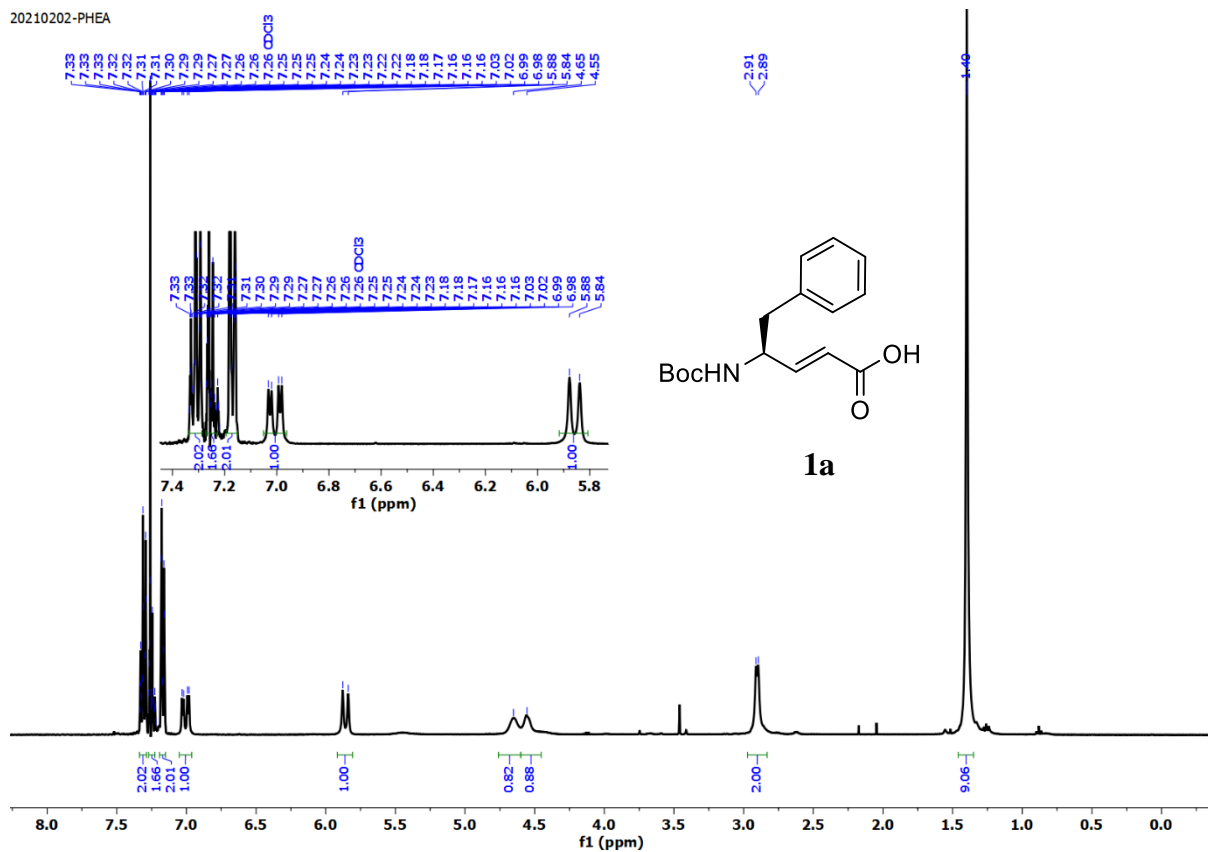

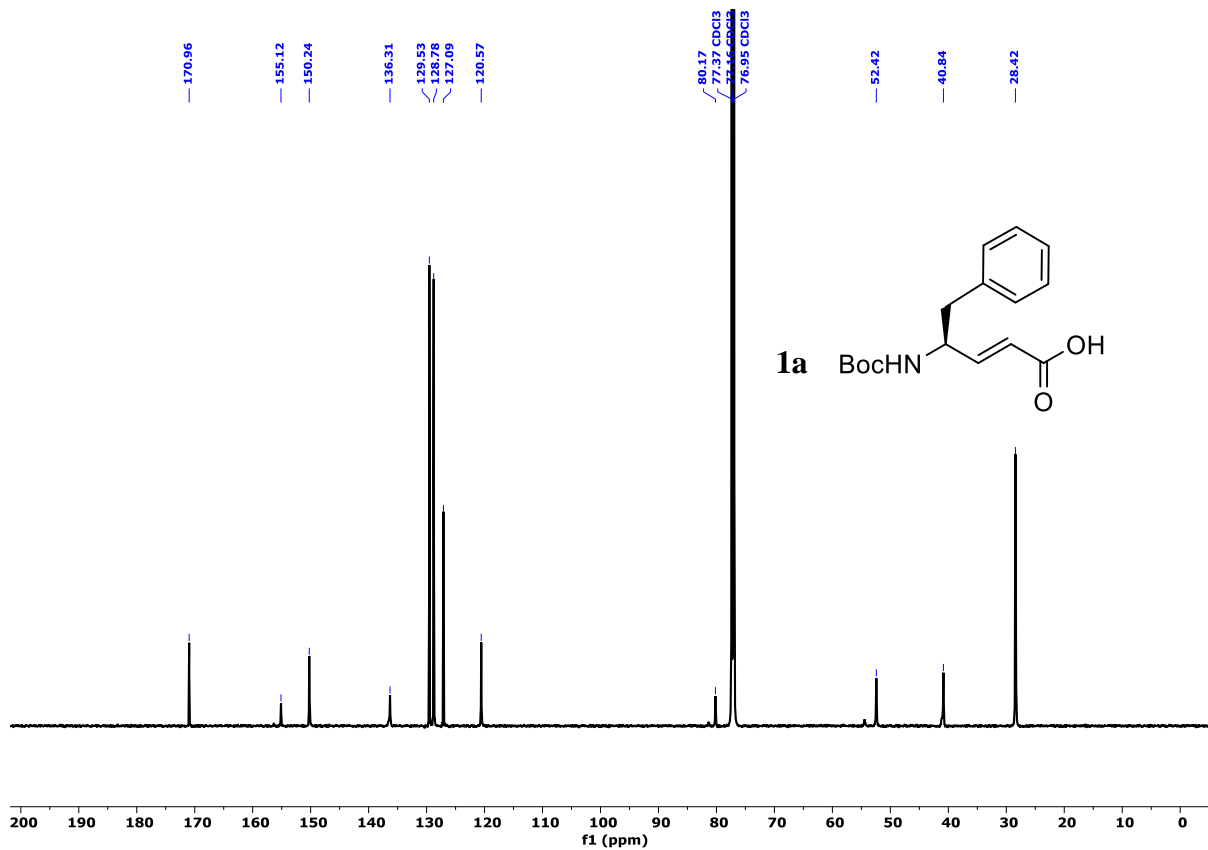

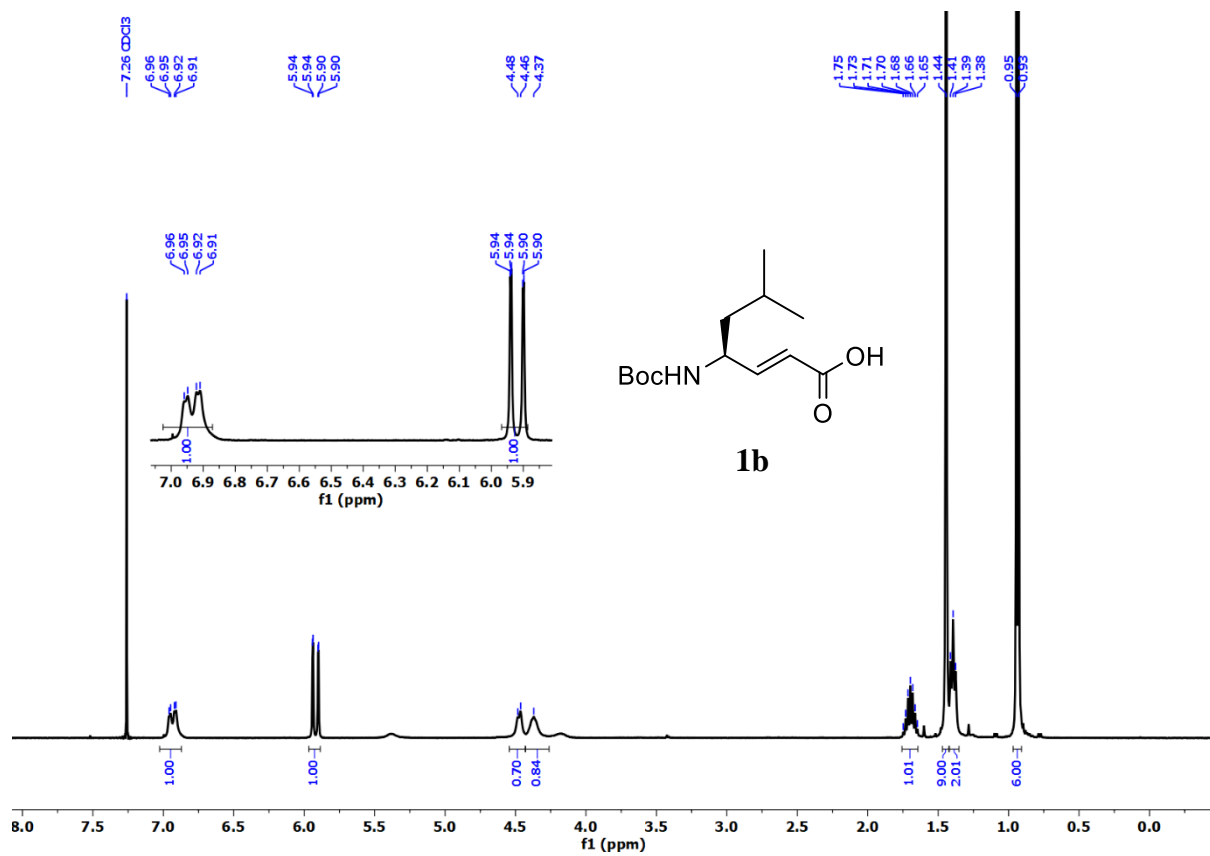



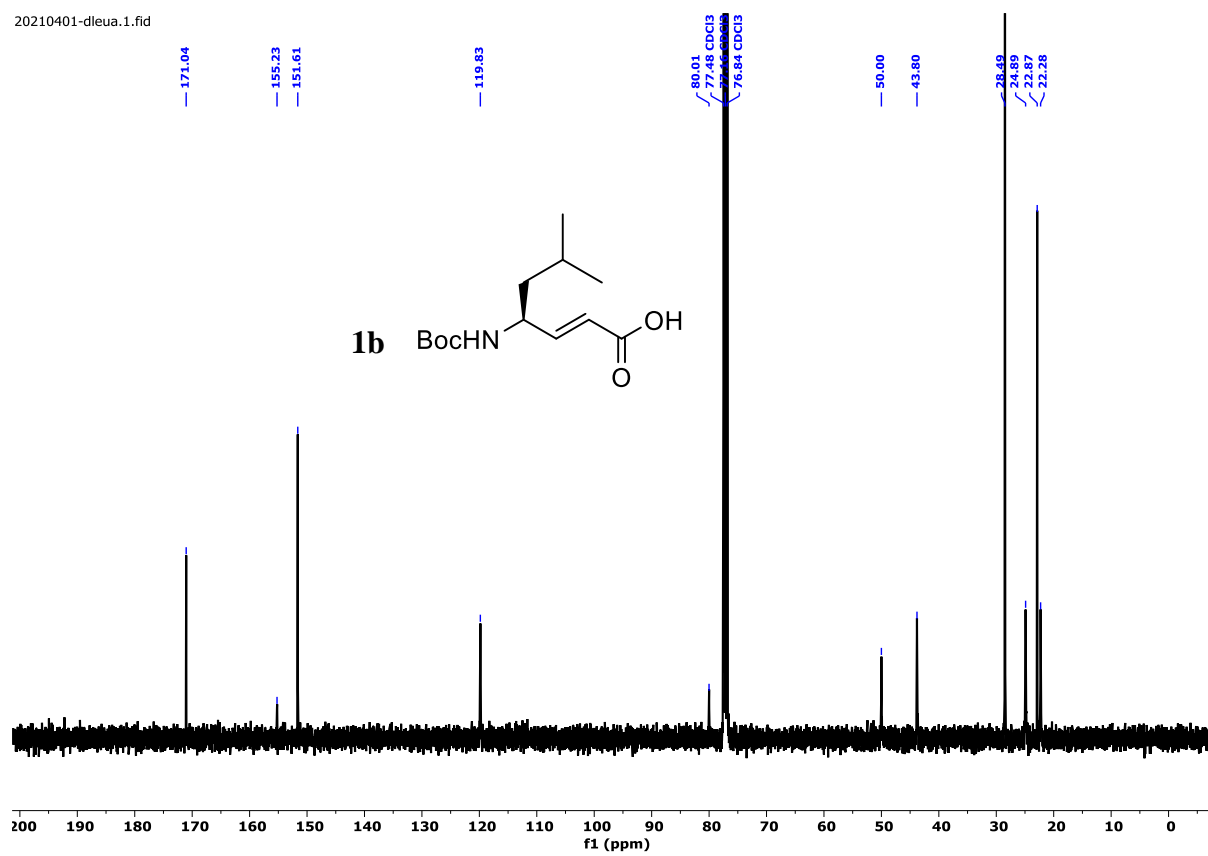

## 9.1. Mass Spectra of compounds

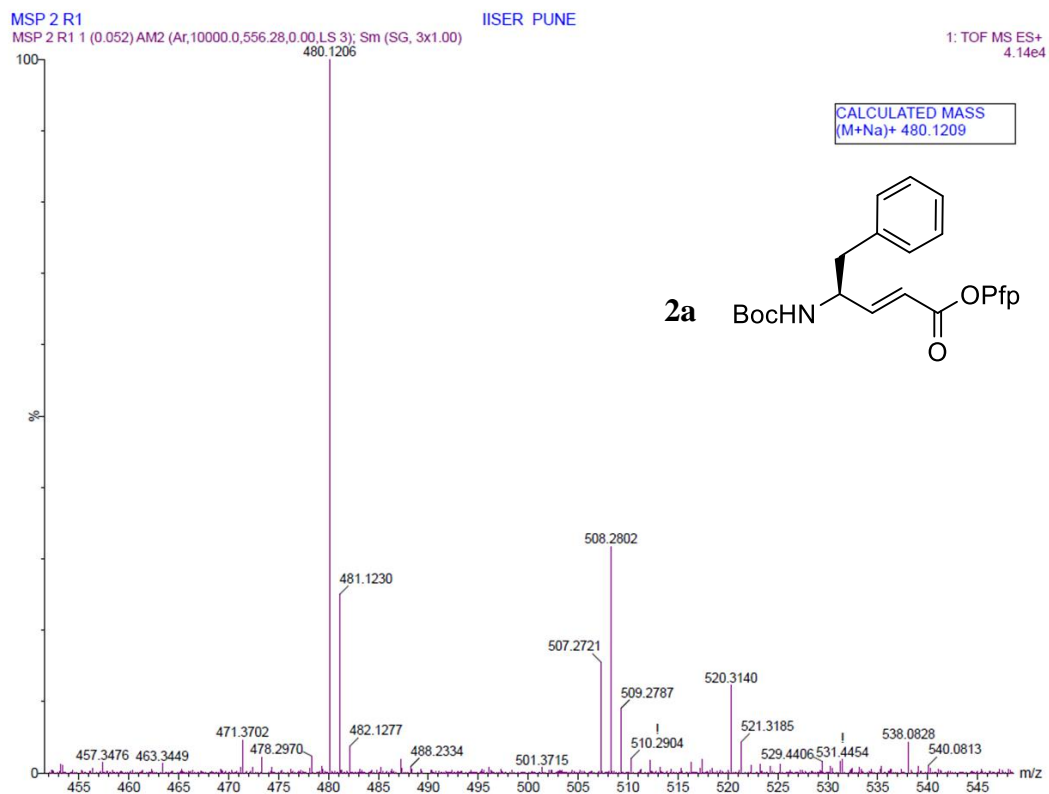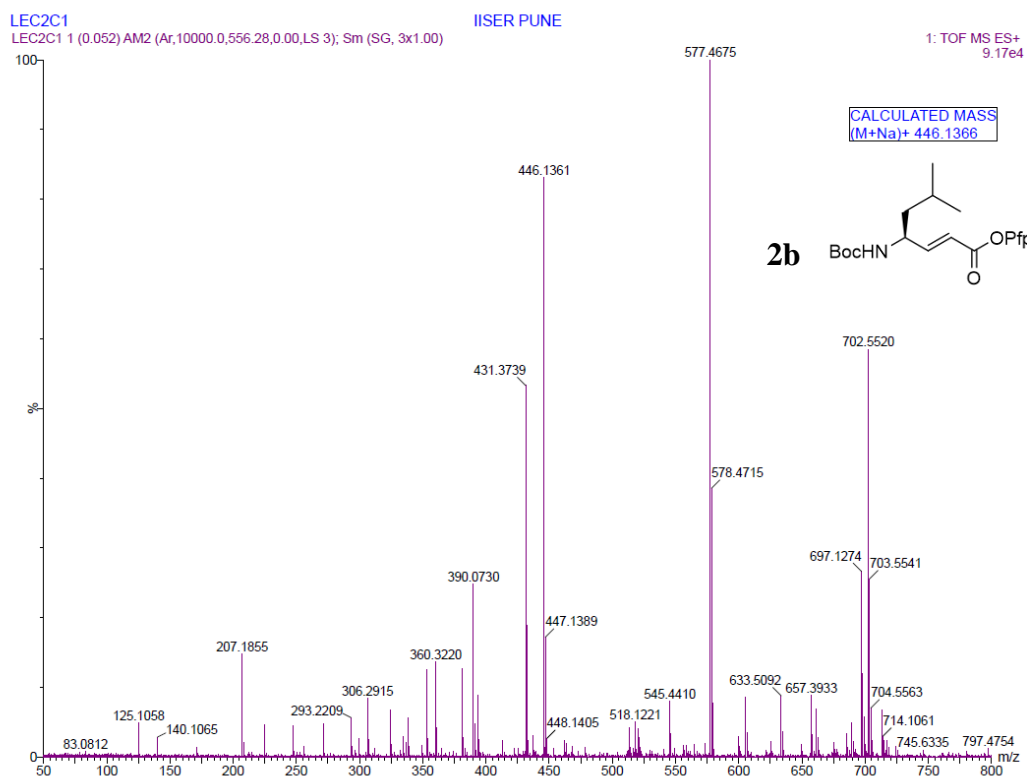

VALPF

VALPF 143 (2.614) AM2 (Ar,20000.0,556.28,0.00,LS 3); Sm (SG, 3x1.00)

IISER PUNE

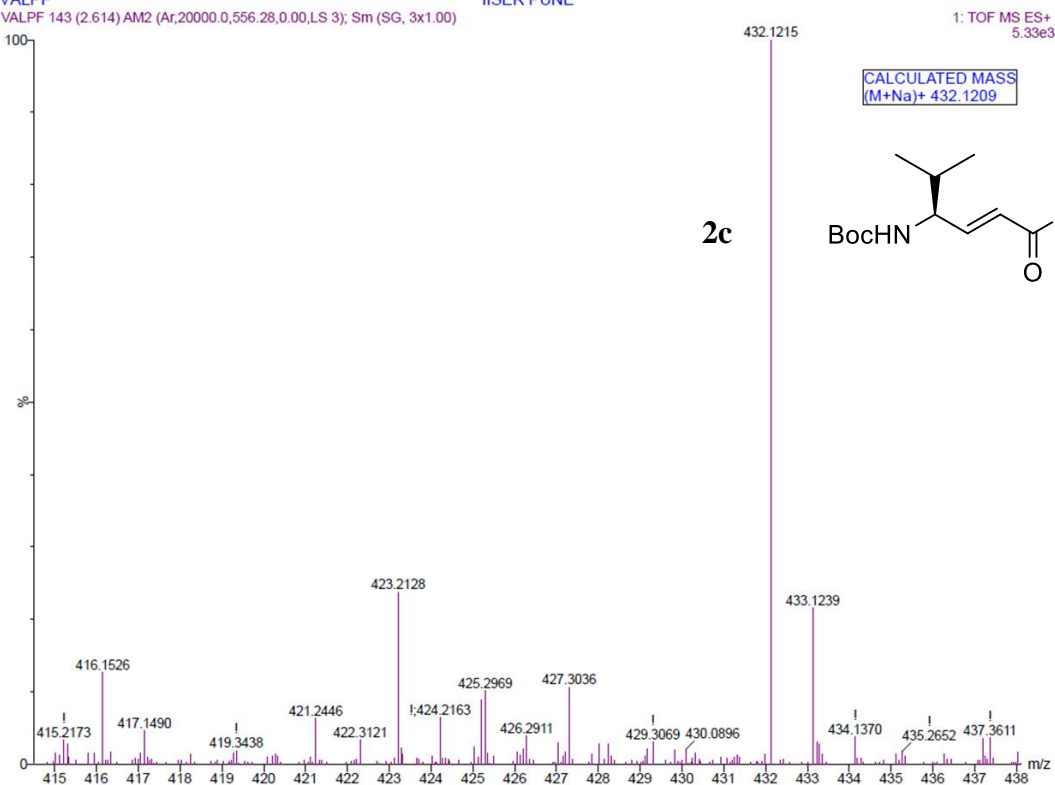

2c

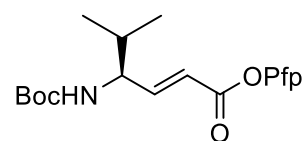

1apf

1apf 1 (0.052) AM2 (Ar,10000.0,556.28,0.00,LS 3); Sm (SG, 3x1.00)

IISER PUNE

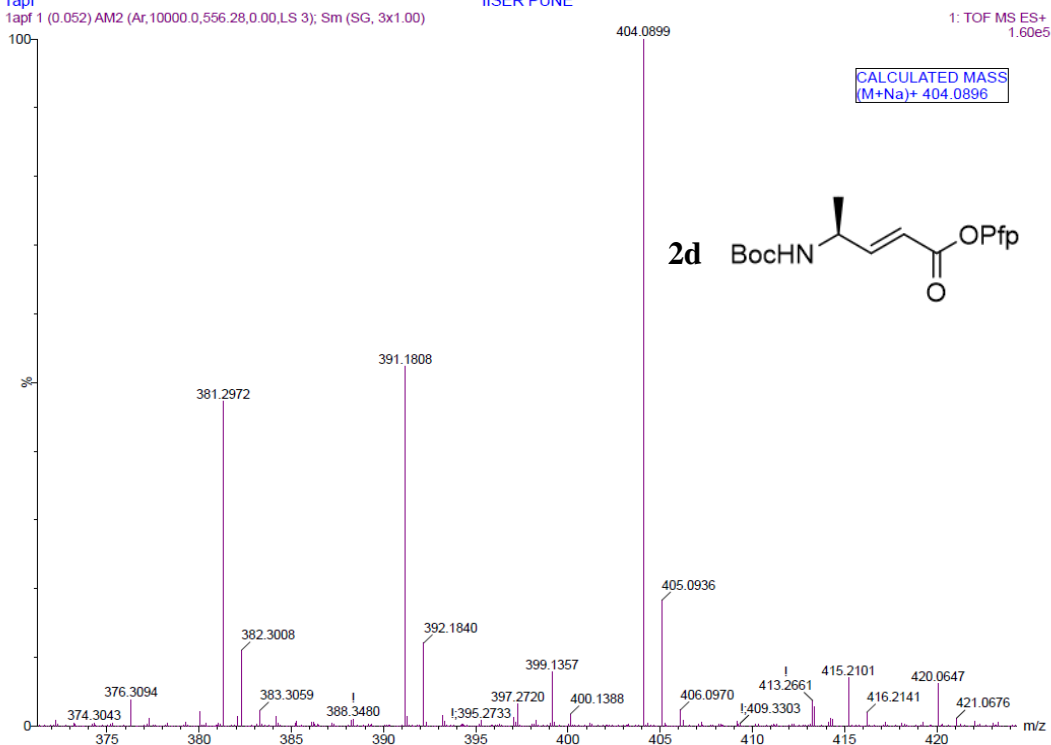

2d

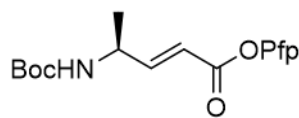

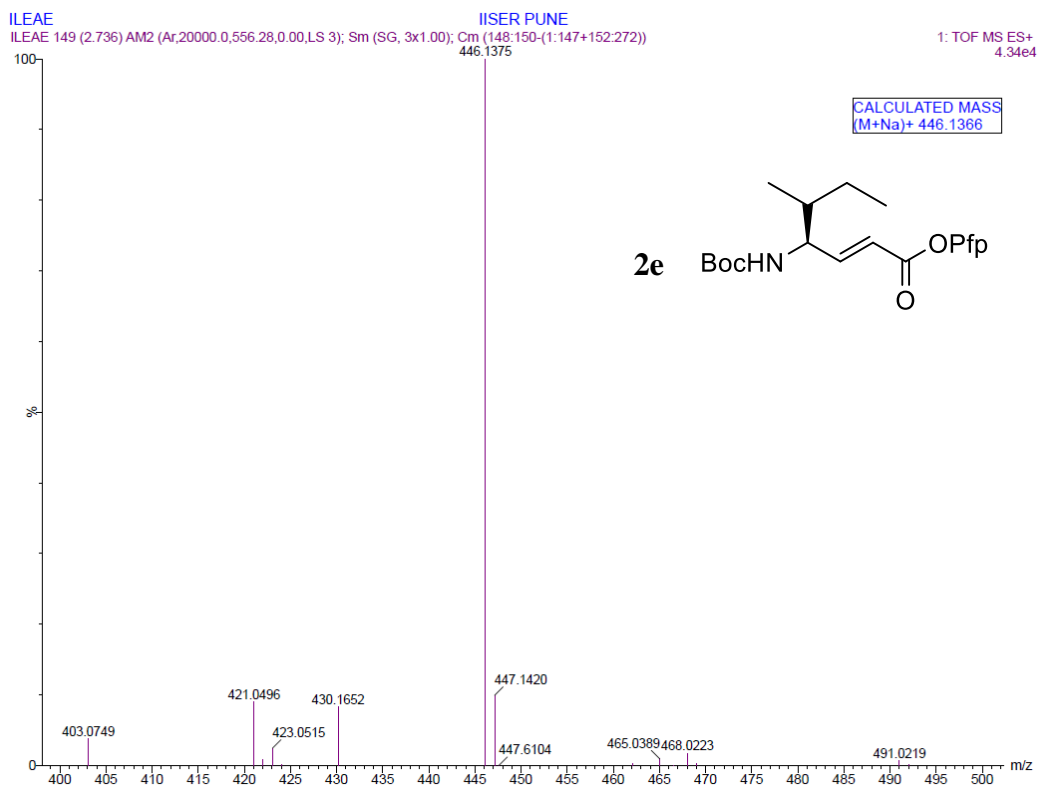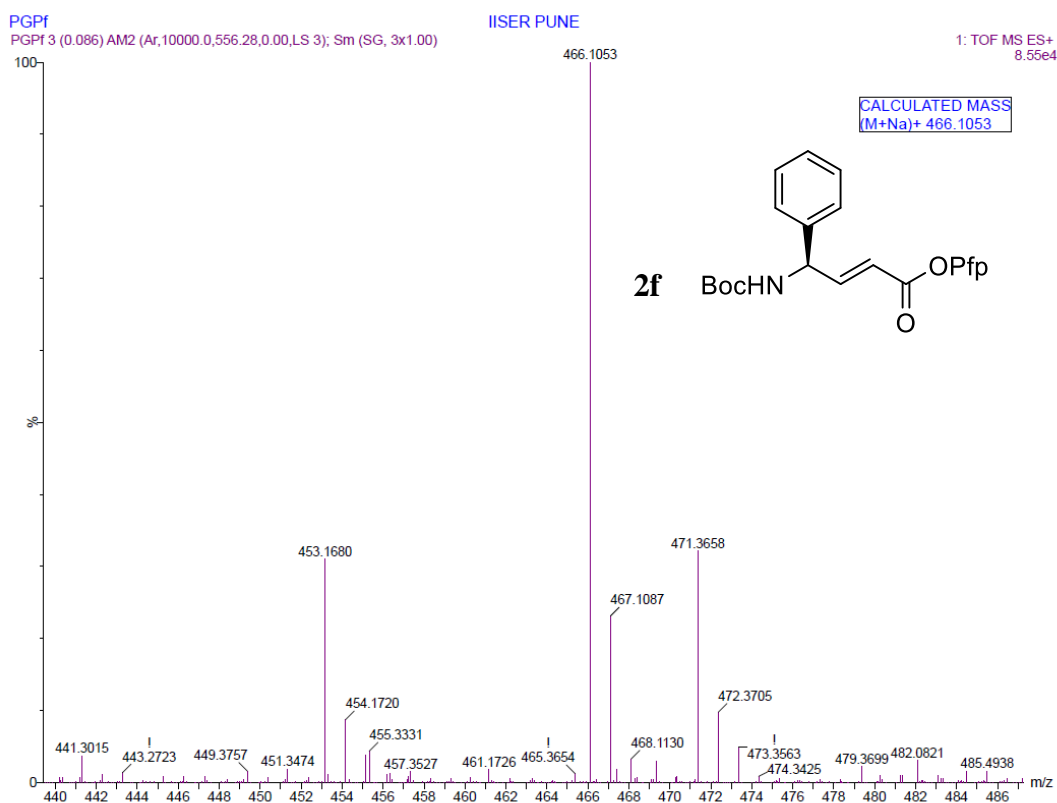

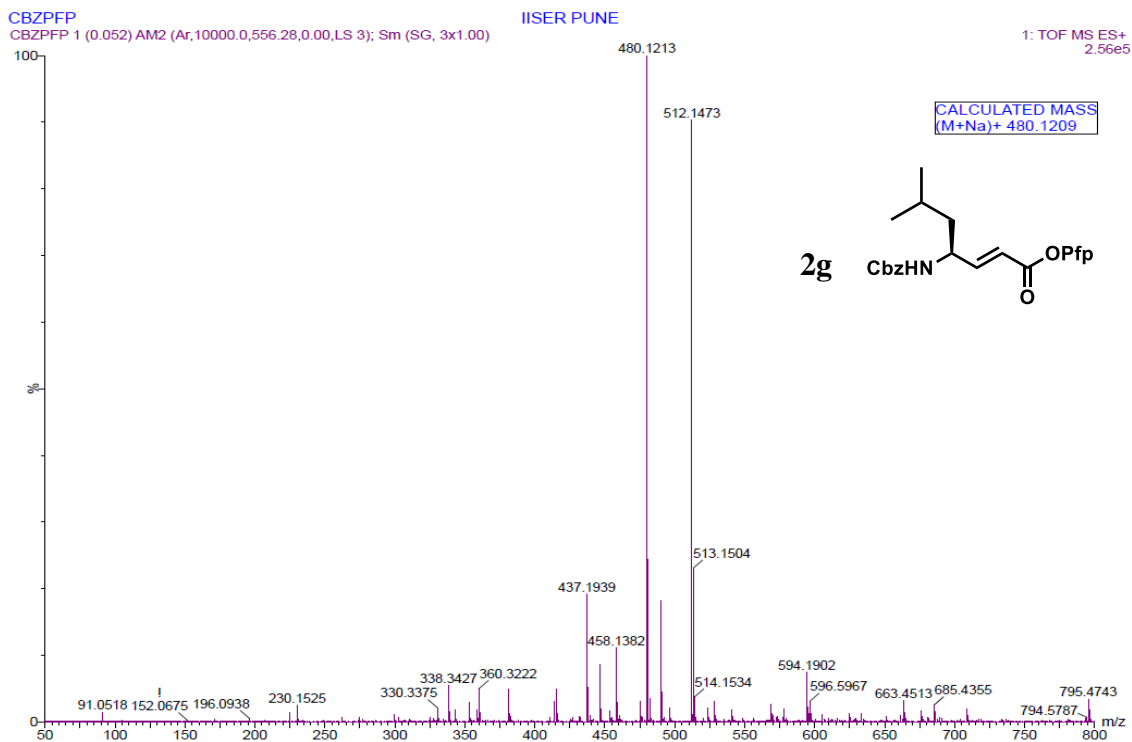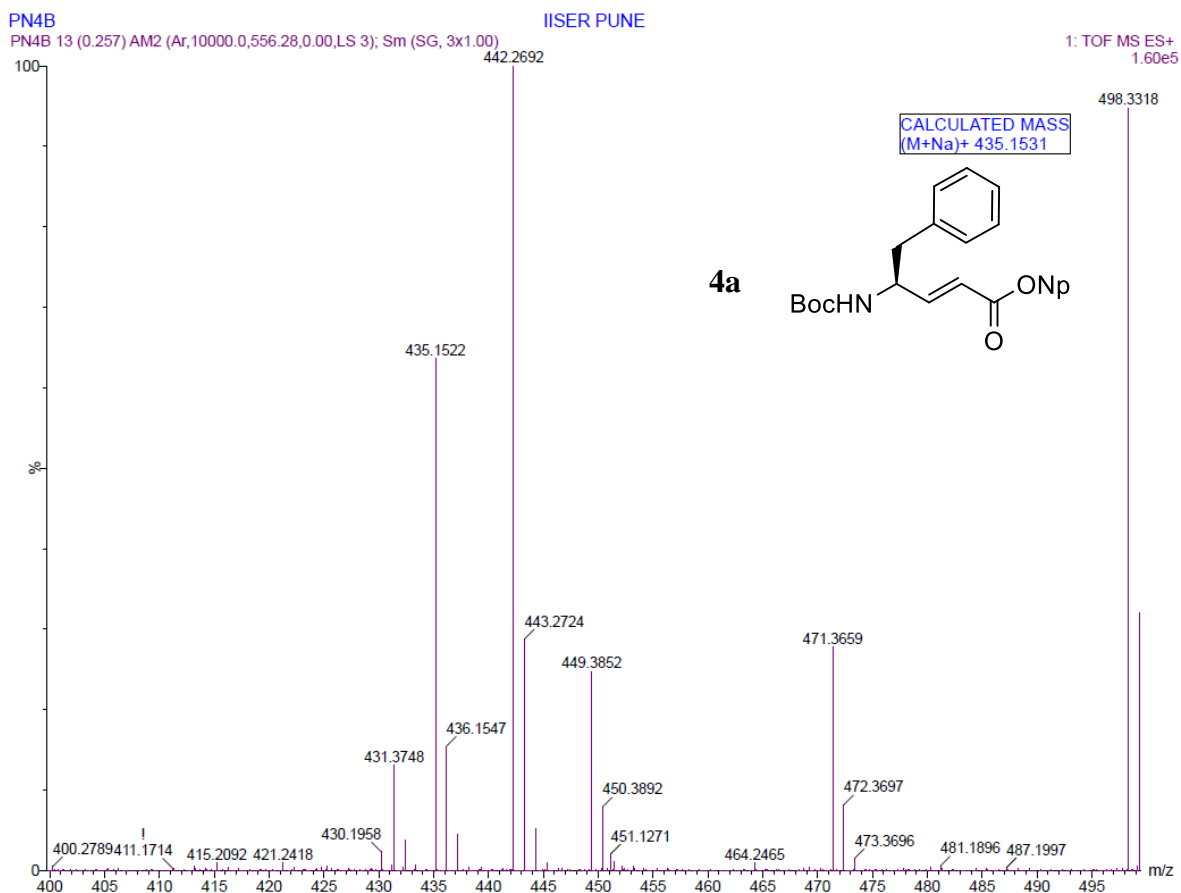

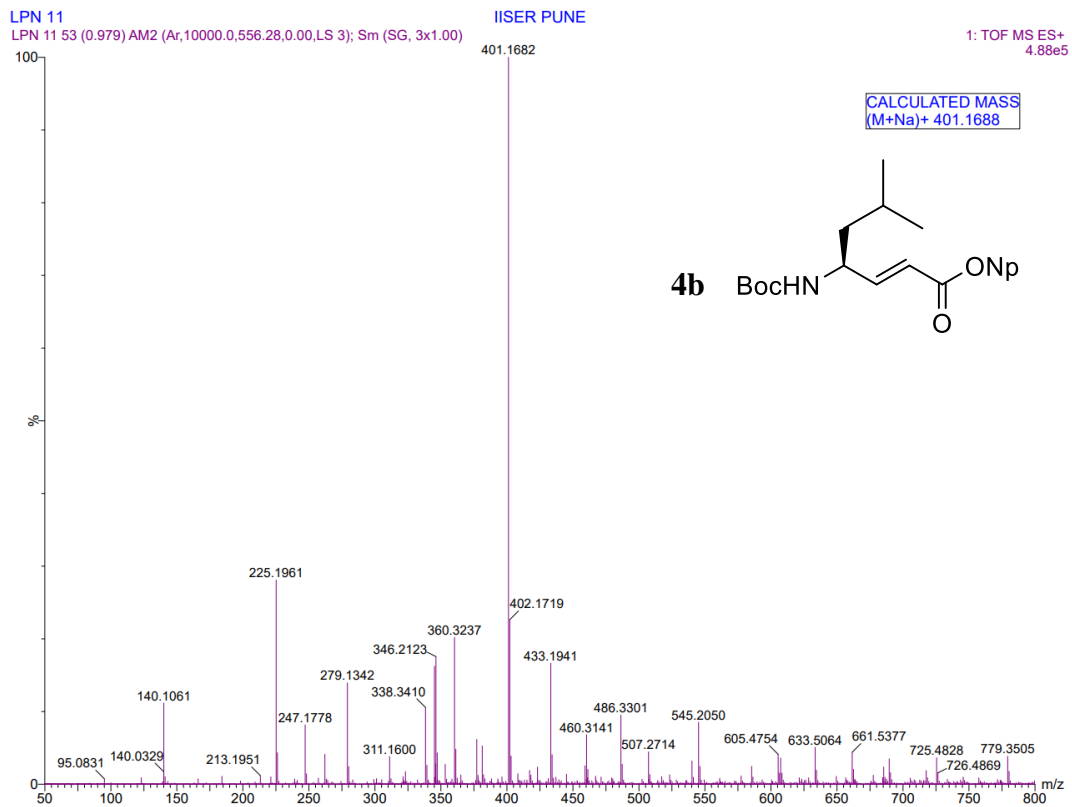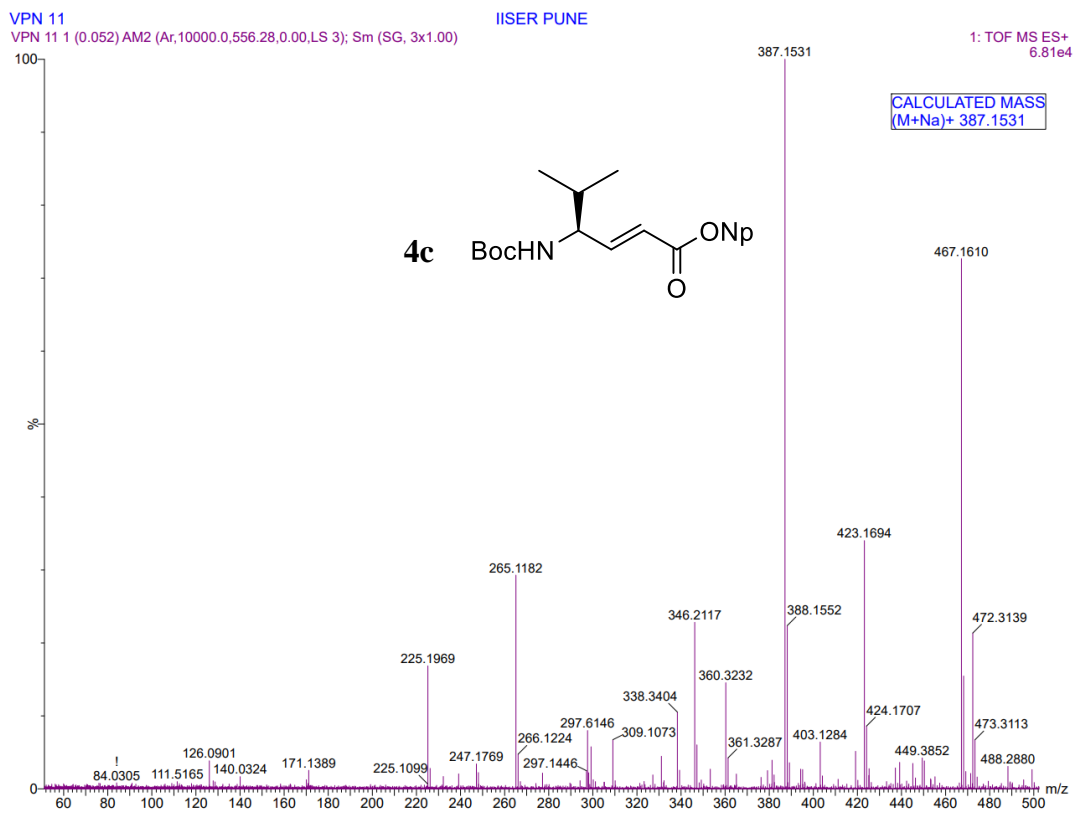

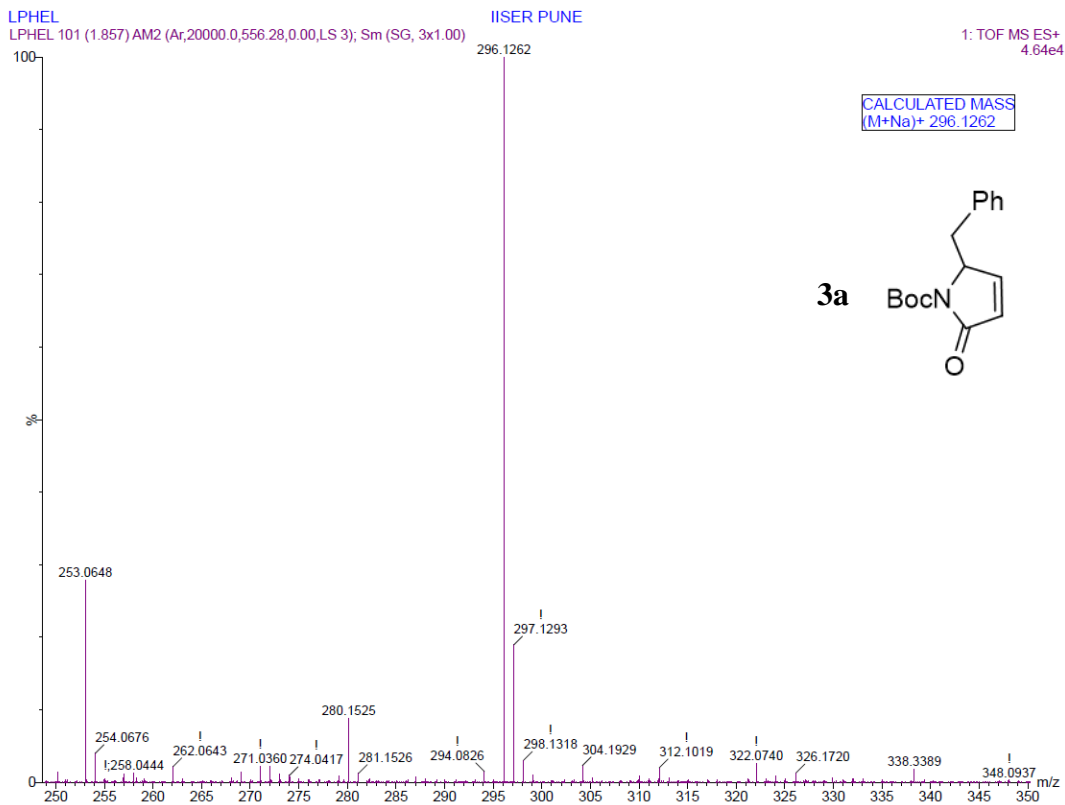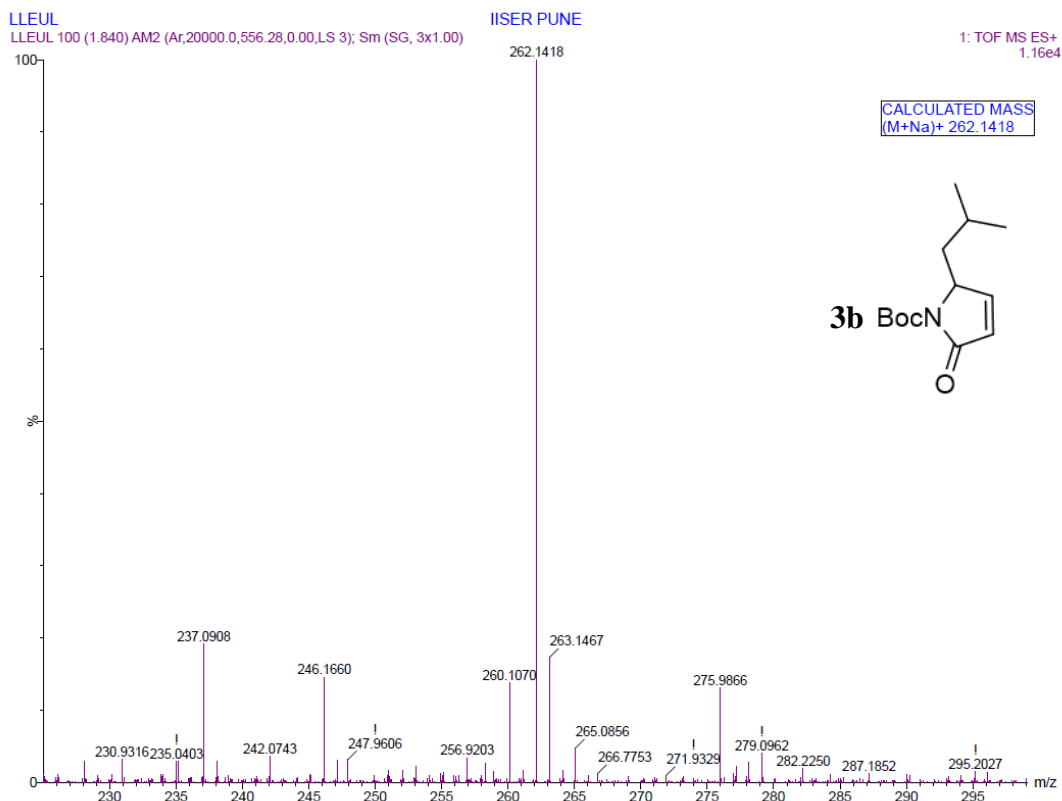

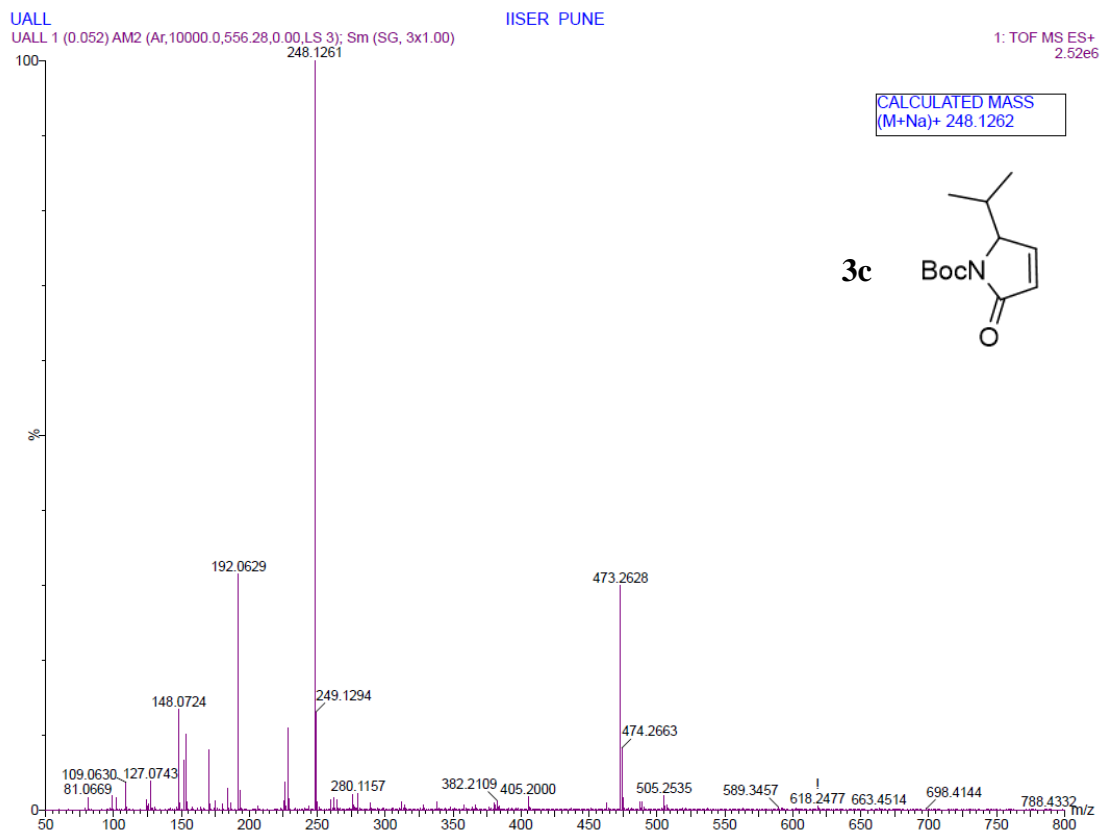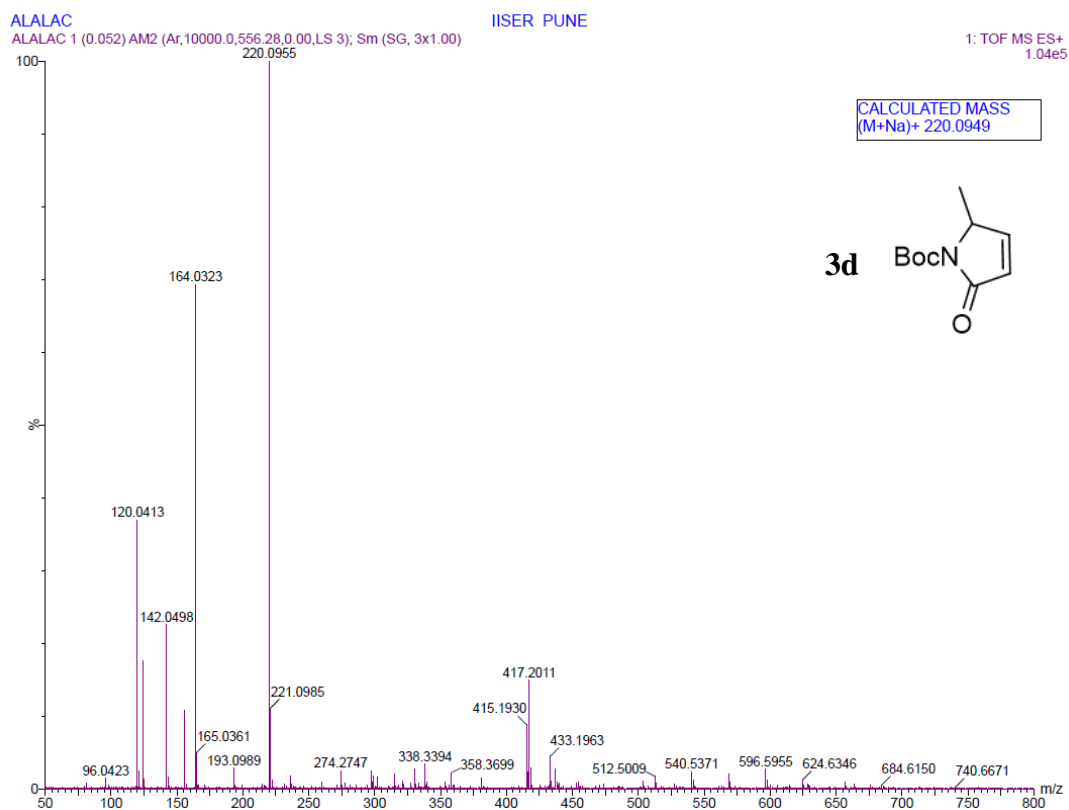



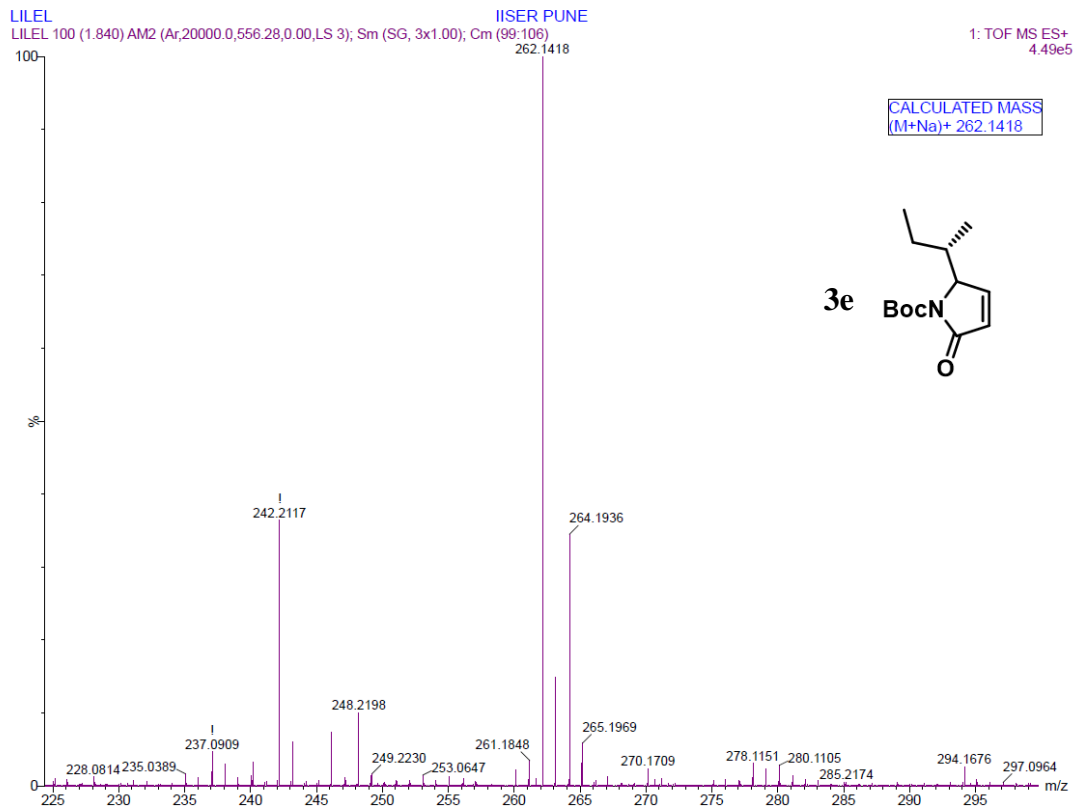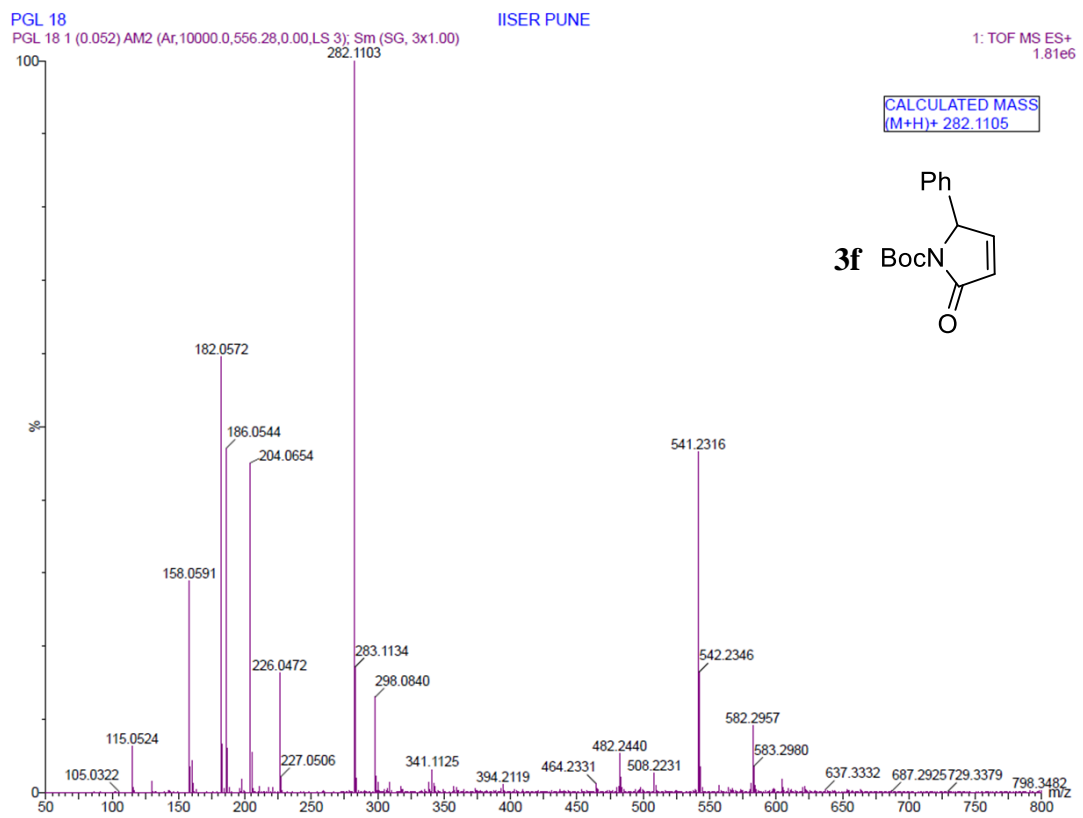

CBZ LAC

CBZ LAC 51 (0.945) AM2 (Ar,10000.0,556.28,0.00,LS 3); Sm (SG, 3x1.00)

IISER PUNE

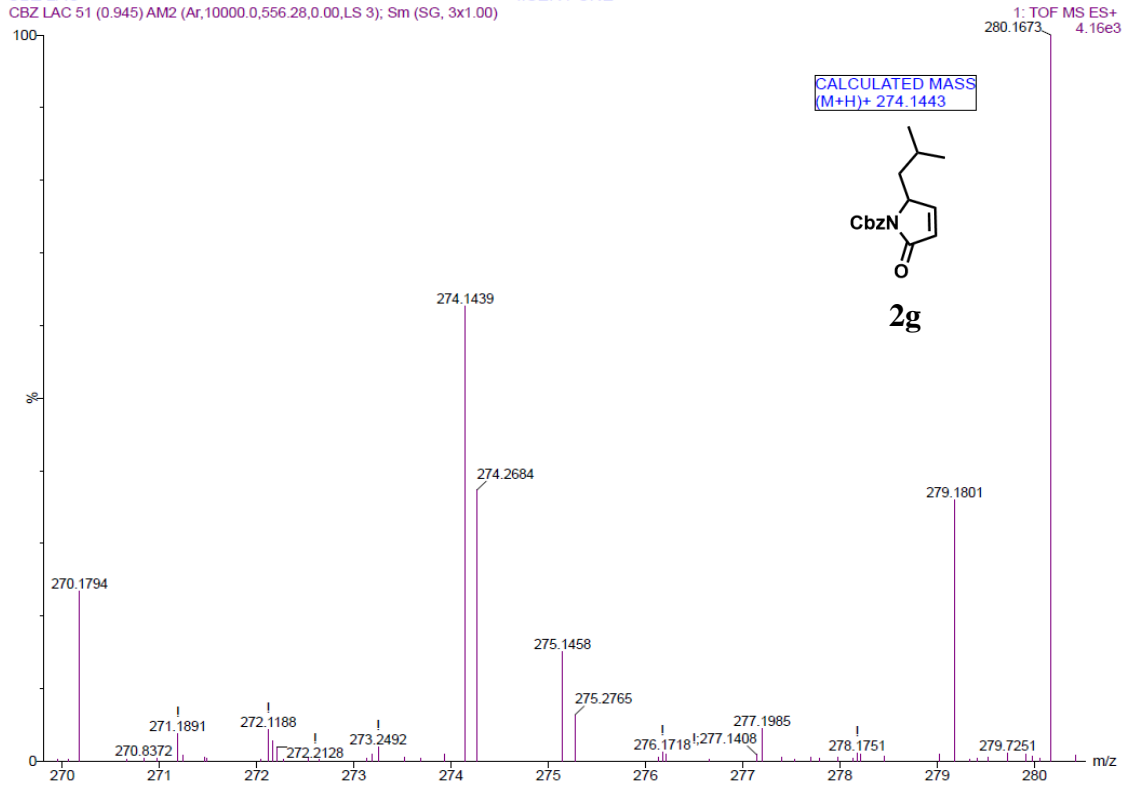

PHEA

PHEA 53 (0.979) AM2 (Ar,10000.0,556.28,0.00,LS 3); Sm (SG, 3x1.00)

IISER PUNE

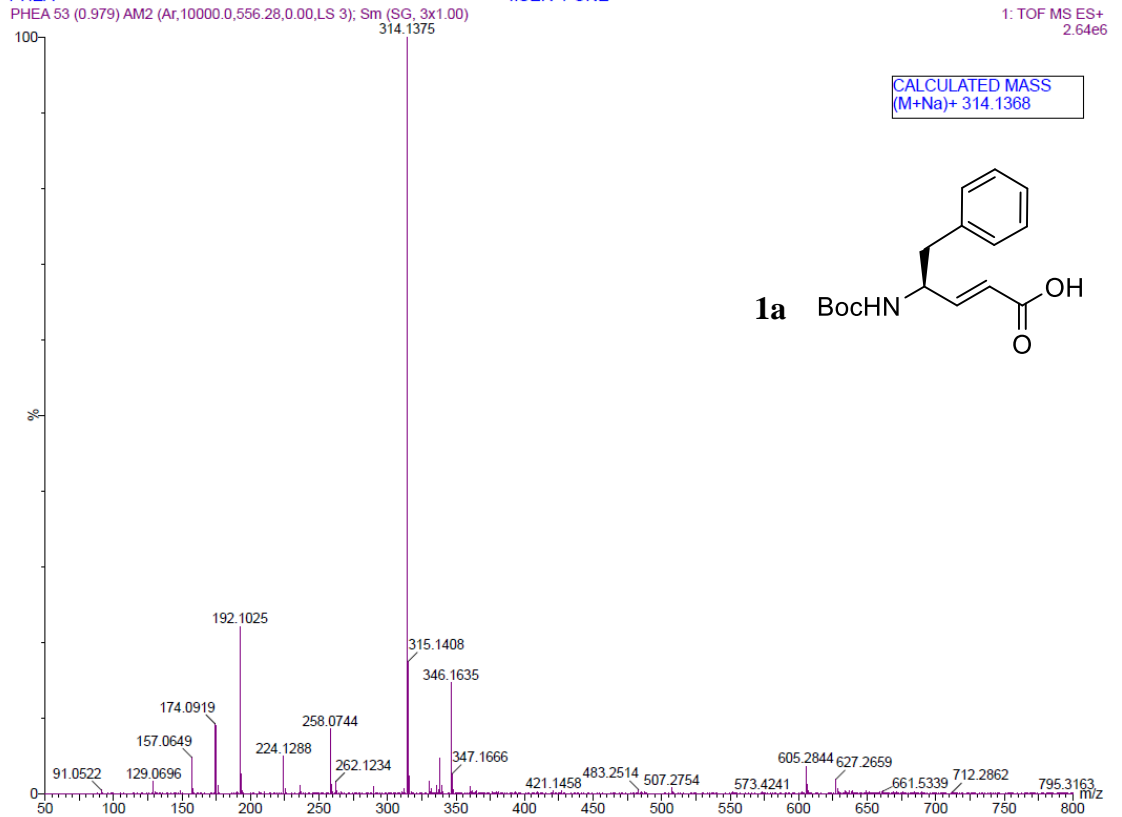

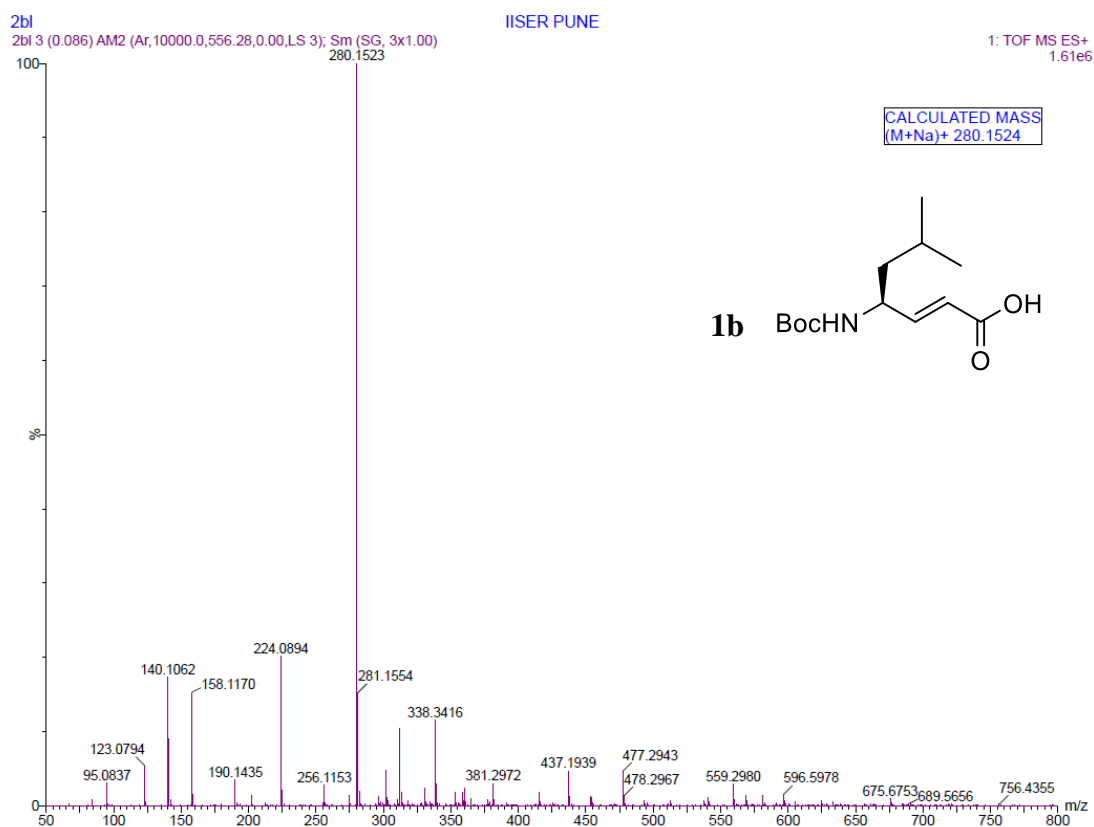

## 9.2. IR Spectra of compounds

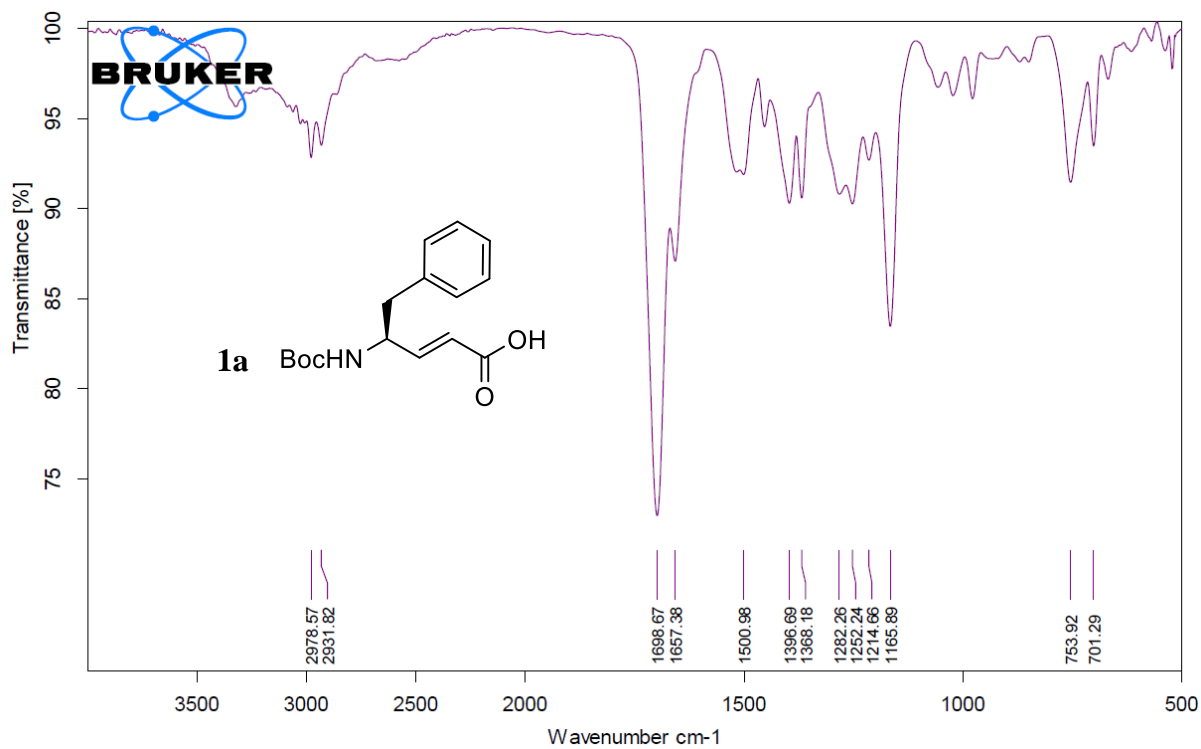

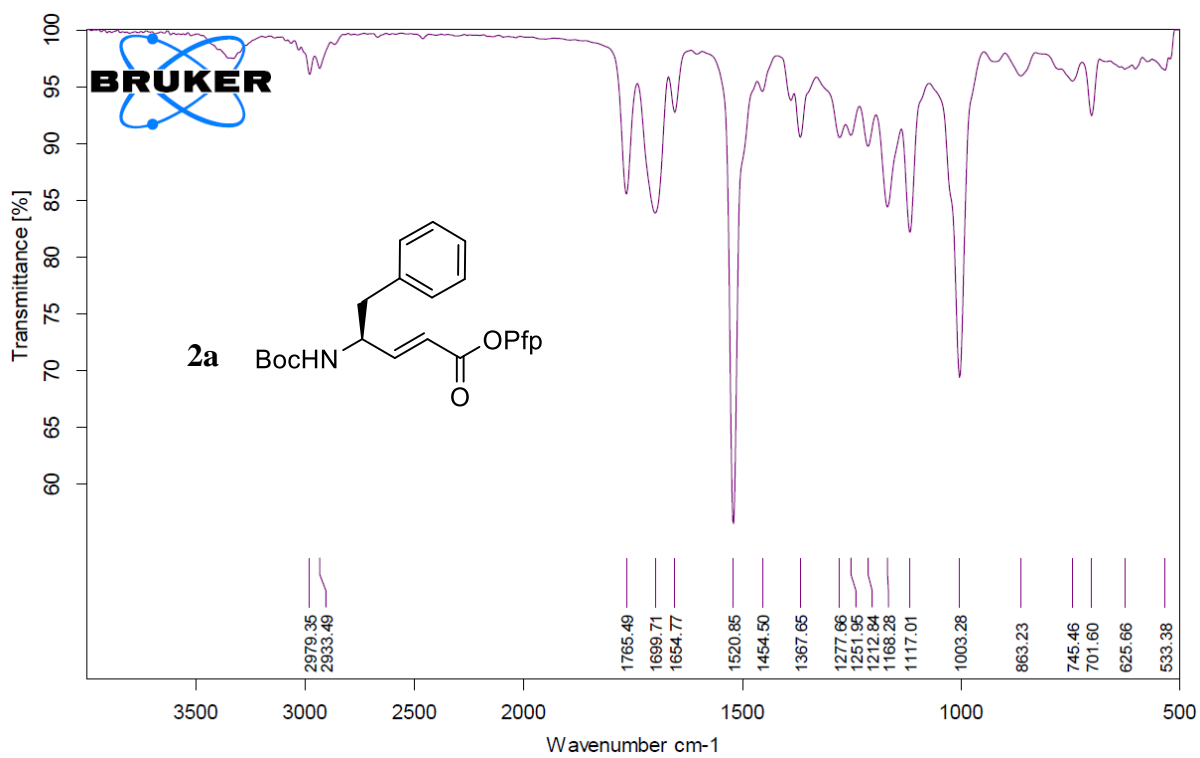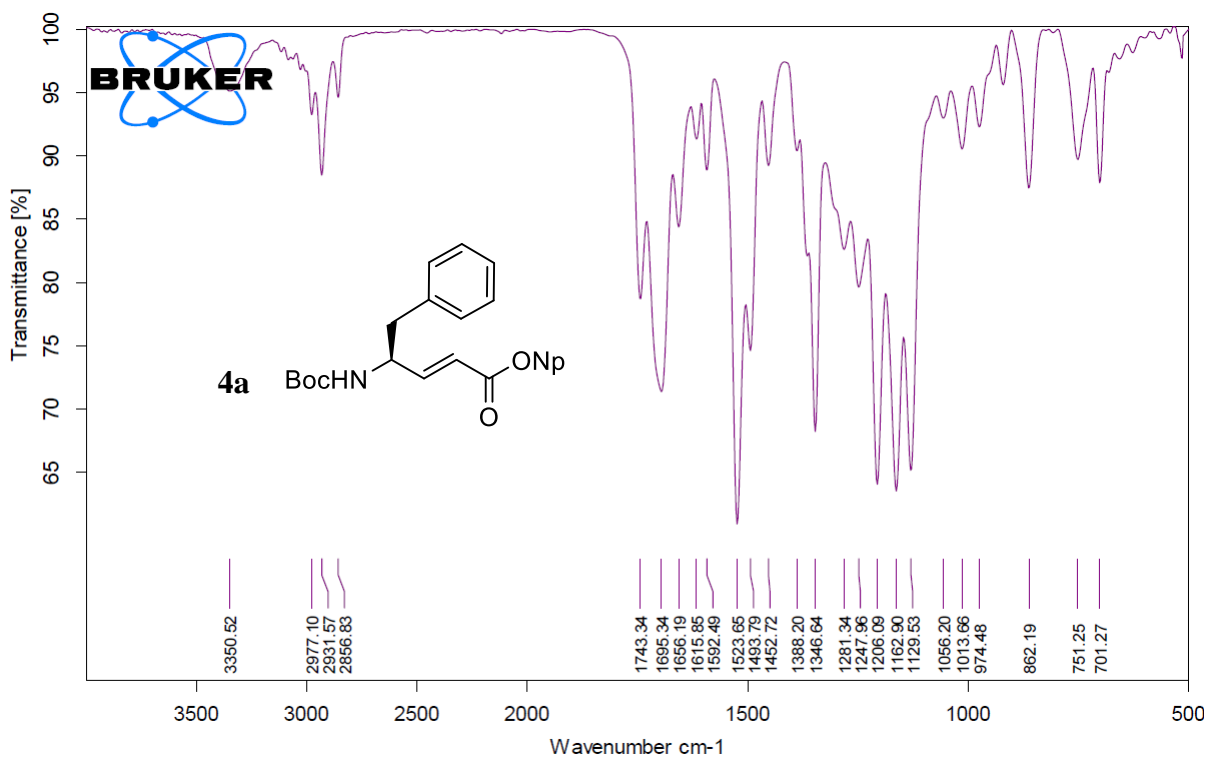

## 10. HPLC Peaks (using chiral column)

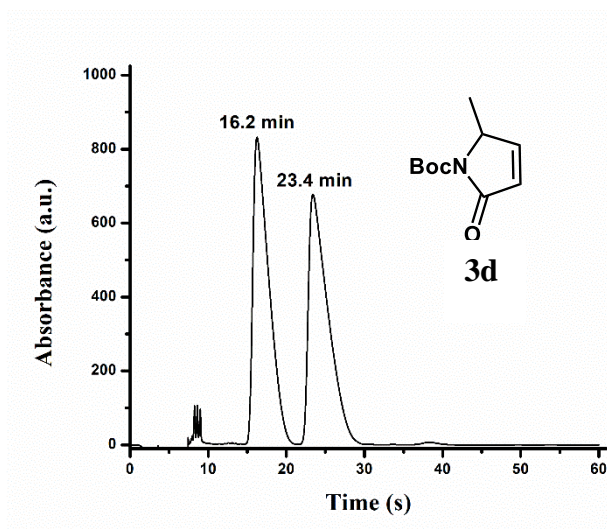

**Fig. 12:** HPLC traces of **3d** using chiral column.

## 11. References

1. S. M. Mali, A. Bandyopadhyay, S. V. Jadhav, M. G. Kumar and H. N. Gopi, *Org. Biomol. Chem.*, 2011, **9**, 6566-6574.
2. H.-Q. Lan, J.-L. Ye, A.-E. Wang, Y.-P. Ruan and P.-Q. Huang, *Chem.—Eur. J.*, 2011, **17**, 958–968.
3. M. Bodanszky, *Nature*, 1955, **175**, 685.
